# Supplementary material for: Synthesis of thiodisaccharides related to 4-thiolactose. Specific structural modifications increase the inhibitory activity against E. coli β-galactosidase
Source: Royal Society of Chemistry journal article supplement (doi:10.1039/d2ob02301f), 2023-01-01

## Electronic Supplementary Information (ESI)

# Synthesis of thiodisaccharides related to 4-thiolactose. Specific structural modifications increase the inhibitory activity against the *E. coli* $\beta$ -galactosidase

Lucas Dada,<sup>a,b</sup> Juan Pablo Colomer,<sup>c,d</sup> Verónica E. Manzano,<sup>a,b\*</sup> Oscar Varela<sup>a,b\*</sup>

<sup>a</sup> Universidad de Buenos Aires. Facultad de Ciencias Exactas y Naturales, Departamento de Química Orgánica, Ciudad Universitaria, Pabellón 2, C1428EHA, Buenos Aires, Argentina

<sup>b</sup> Consejo Nacional de Investigaciones Científicas y Técnicas (CONICET)-UBA, Centro de Investigación en Hidratos de Carbono (CIHIDECAR)

<sup>c</sup> Instituto de Investigaciones en Físico-Química de Córdoba (INFIQC)

<sup>d</sup> Departamento de Química Orgánica, Universidad Nacional de Córdoba, Facultad Ciencias Químicas, Ciudad Universitaria, Edificio de Ciencias II, Córdoba, Argentina

\*Corresponding Author. E mail: [veromanz@qo.fcen.uba.ar](mailto:veromanz@qo.fcen.uba.ar), [varela@qo.fcen.uba.ar](mailto:varela@qo.fcen.uba.ar)

### Contents

|                                                                                                           |         |
|-----------------------------------------------------------------------------------------------------------|---------|
| General Information _____                                                                                 | S2      |
| Determination of the configuration of <b>6</b> , <b>7</b> , <b>10–12</b> based on NMR spectral data _____ | S2-S3   |
| Coupling Constant values for ulose <b>11</b> and <b>12</b> _____                                          | S3      |
| Effect of concentration on the enzymatic activity for compounds <b>1</b> and <b>18</b> _____              | S3      |
| <sup>1</sup> H and <sup>13</sup> C NMR Spectra of Compounds <b>4–8</b> , <b>10–25</b> _____               | S4-S45  |
| NOESY spectra of compounds Compounds <b>17–19</b> , <b>21–23</b> , <b>25</b> _____                        | S46-S52 |

## General Information

Column chromatography was carried out with silica gel 60 (230–400 mesh). Analytical thin-layer chromatography (TLC) was performed on silica gel 60 F<sub>254</sub> aluminum-supported plates (layer thickness 0.2 mm). The spots were visualized by exposure to UV light and by charring with sulfuric acid (5% v/v in EtOH, containing 0.5% *p*-anisaldehyde). Optical rotations were measured at 25 °C in a 1 dm cell, in the solvent indicated. Nuclear magnetic resonance (NMR) spectra were recorded at 500 MHz (<sup>1</sup>H) or 125.7 MHz (<sup>13</sup>C). Chemical shifts were calibrated to tetramethylsilane or to a residual solvent peak. Assignments of <sup>1</sup>H and <sup>13</sup>C NMR spectra were assisted by 2D <sup>1</sup>H-COSY or NOESY, and 2D <sup>1</sup>H-<sup>13</sup>C HSQC or HMBC experiments. High-resolution mass spectra (HRMS) were obtained using the electrospray ionization (ESI) technique and Q-TOF detection.

### Determination of the configuration of thiodisaccharides based on NMR spectral data

The structure of the 3-deoxy-4-thio-hexopyranoside moiety of thiodisaccharides was deduced on the basis of their <sup>1</sup>H-NMR spectra, as follows.

**Thiodisaccharide 6:** The <sup>1</sup>H-NMR spectrum of **6** showed the H-1 signal as a doublet at 4.93 ppm with a coupling constant value ( $J_{1,2} = 3.7$  Hz), typical of an axial-equatorial arrangement. The coupling of H-2 with H-3ax ( $J_{2,3ax} = 12.0$  Hz) was characteristic of *trans* diaxial protons, while that with H-3eq ( $J_{2,3eq} = 3.6$  Hz) agreed with their axial-equatorial orientation. Hence, an *R* configuration was assigned to the new stereocenter at C-2. Similarly, the coupling constant values  $J_{3eq,4}$  (2.8 Hz),  $J_{3ax,4}$  (2.8 Hz) and  $J_{4,5}$  (2.5 Hz) were consistent with the *R* configuration for C-4.

**Thiodisaccharide 7:** The <sup>1</sup>H NMR spectrum of **7** revealed large *J* values for the coupling of H-4 with H-3ax ( $J_{3ax,4} = 12.0$  Hz) and H-5 ( $J_{4,5} = 11.5$  Hz) in agreement with a *trans*-diaxial orientation for all these protons, while H-4 and H-3eq ( $J_{3eq,4} = 5.6$  Hz) maintained an axial-equatorial disposition. Comparison of the <sup>1</sup>H-NMR spectra of **4** and **7** revealed an upfield shifting of the H-4 signal from 3.70 ppm in **4** to 3.32 ppm in **7**. This could be attributed to the change in orientation of H-4 from an equatorial (in **4**) to an axial (in **7**) arrangement, which generally implies signal protection in such six-membered rings.<sup>1</sup>

**Thiodisaccharide 10:** The <sup>1</sup>H-NMR spectrum of this compound showed a broad singlet (4.97 ppm) for H-2 and the downfield vinyl signals for H-4 and H-5 at 6.22 and 6.99 ppm, respectively. The coupling constant analysis suggested the enone adopted an <sup>o</sup>*E* conformation, since the small coupling constant value for the vinyl H-5 and allylic H-6 protons ( $J_{5,6} = 1.6$  Hz) suggested an almost perpendicular arrangement among them. Furthermore, H-4 exhibited long-range couplings with H-2 ( ${}^4J_{2,4} = 0.3$  Hz) and with H-6 ( ${}^4J_{4,6} = 2.5$  Hz). All these *J* values were in agreement with those predicted by the Garbisch equation for the <sup>o</sup>*E* conformation of **10**.<sup>2</sup>

**Thiodisaccharides 11 and 12:** The configuration at C-4 in **11** and **12** was determined according to relevant coupling constants values, which are summarized in Table S2. The *p*-nitrobenzyl derivative **11**, similar to analogue **4**, showed relatively small coupling constant values for H-4 with H-3 and H-5 and a long-range coupling between H-1 and H-3<sub>eq</sub>, confirming the *R* configuration for C-4. The isomer **12** had opposite configuration at C-4, according to the large *J* values of H-4 with H-3<sub>ax</sub> and H-5.

| Compound  | Coupling constant (Hz) |             |           |                 |             |
|-----------|------------------------|-------------|-----------|-----------------|-------------|
|           | $J_{3eq,4}$            | $J_{3ax,4}$ | $J_{4,5}$ | ${}^4J_{1,3eq}$ | $J_{1',2'}$ |
| <b>11</b> | 2.4                    | 4.9         | 2.4       | 0.9             | 10.0        |
| <b>12</b> | 5.4                    | 12.0        | 10.7      | -               | 9.8         |

**Table S2:** Coupling constant values for uloses **11** and **12**

**Effect of Concentration of Thioglycomimetics 1 and 18 on the enzymatic activity of the  $\beta$ -galactosidase from *E. coli*.**

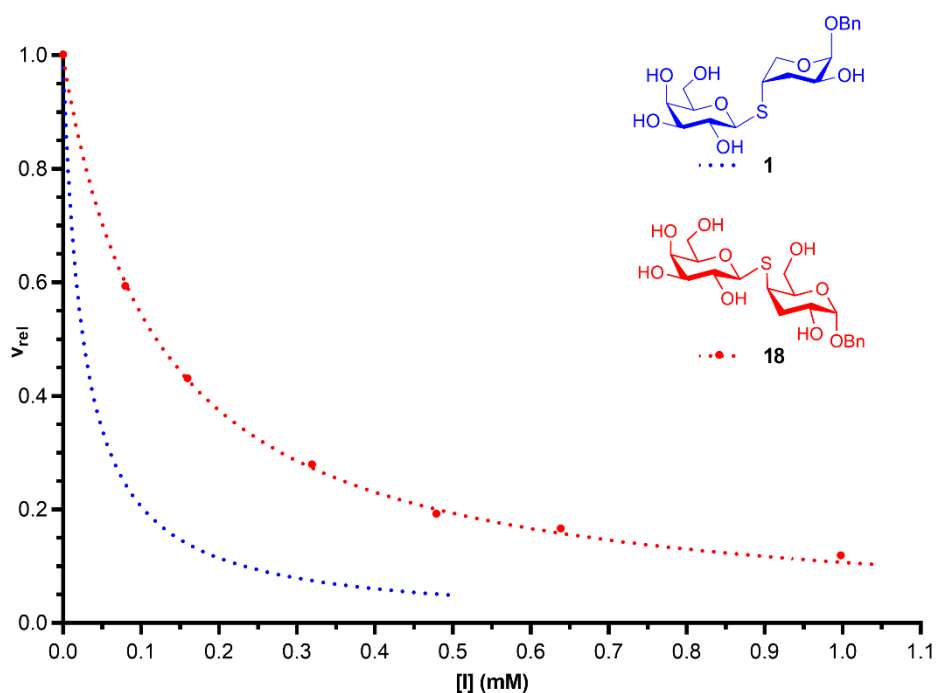

## References

- 1 R. U. Lemieux, R. K. Kullnig, H. J. Bernstein and W. G. Schneider, *J. Am. Chem. Soc.*, 1958, **80**, 6098–6105.
- 2 E. W. Garbisch, *J. Am. Chem. Soc.*, 1964, **86**, 5561–5564.

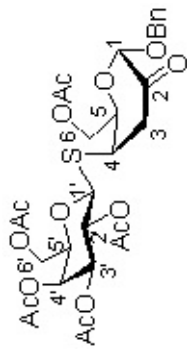

S-4

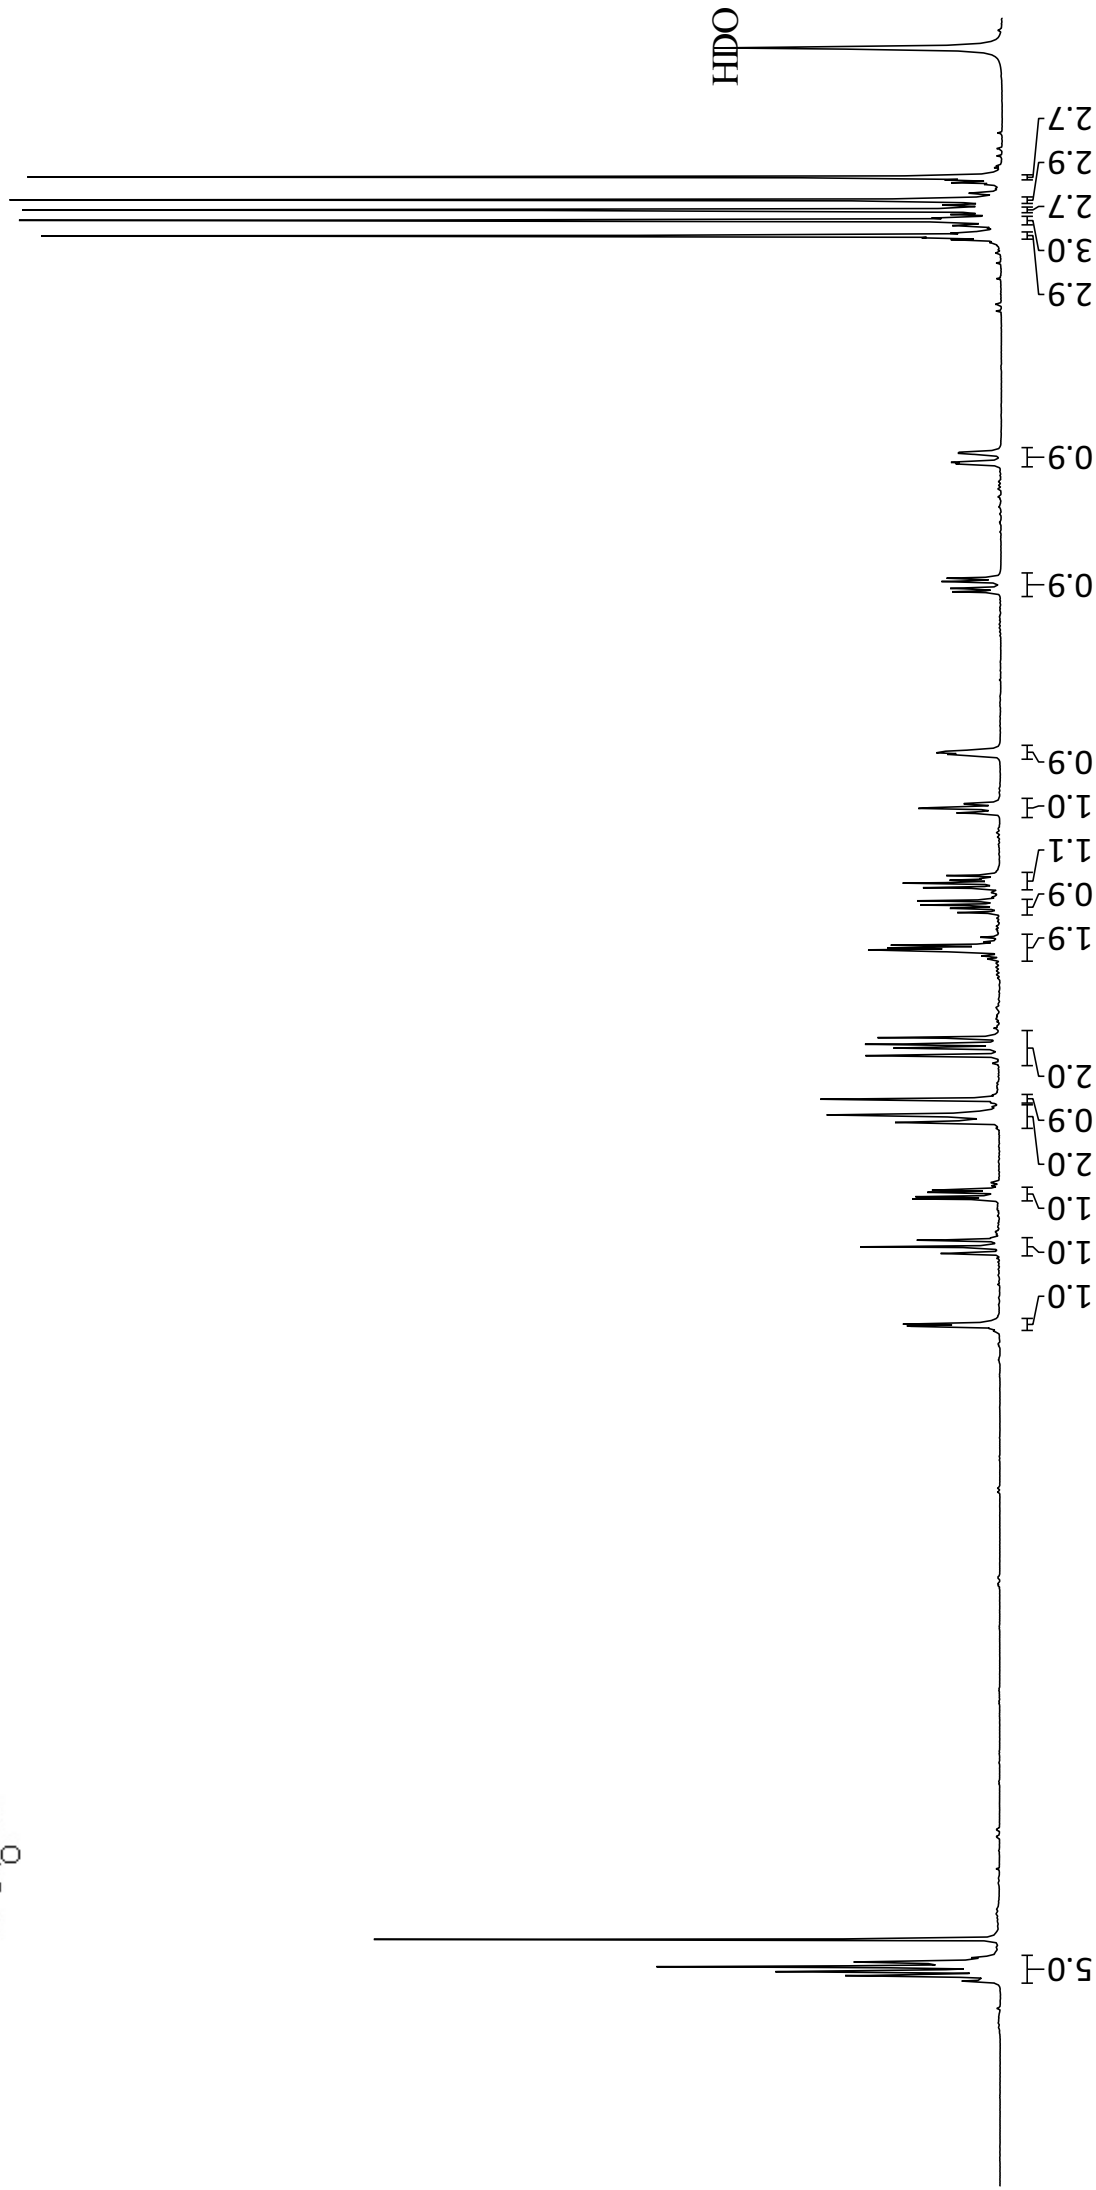

<sup>1</sup>H-NMR Spectrum of compound 4 (500 MHz, CDCl<sub>3</sub>).

<sup>13</sup>C-NMR Spectrum of compound 4 (125.7 MHz, CDCl<sub>3</sub>).

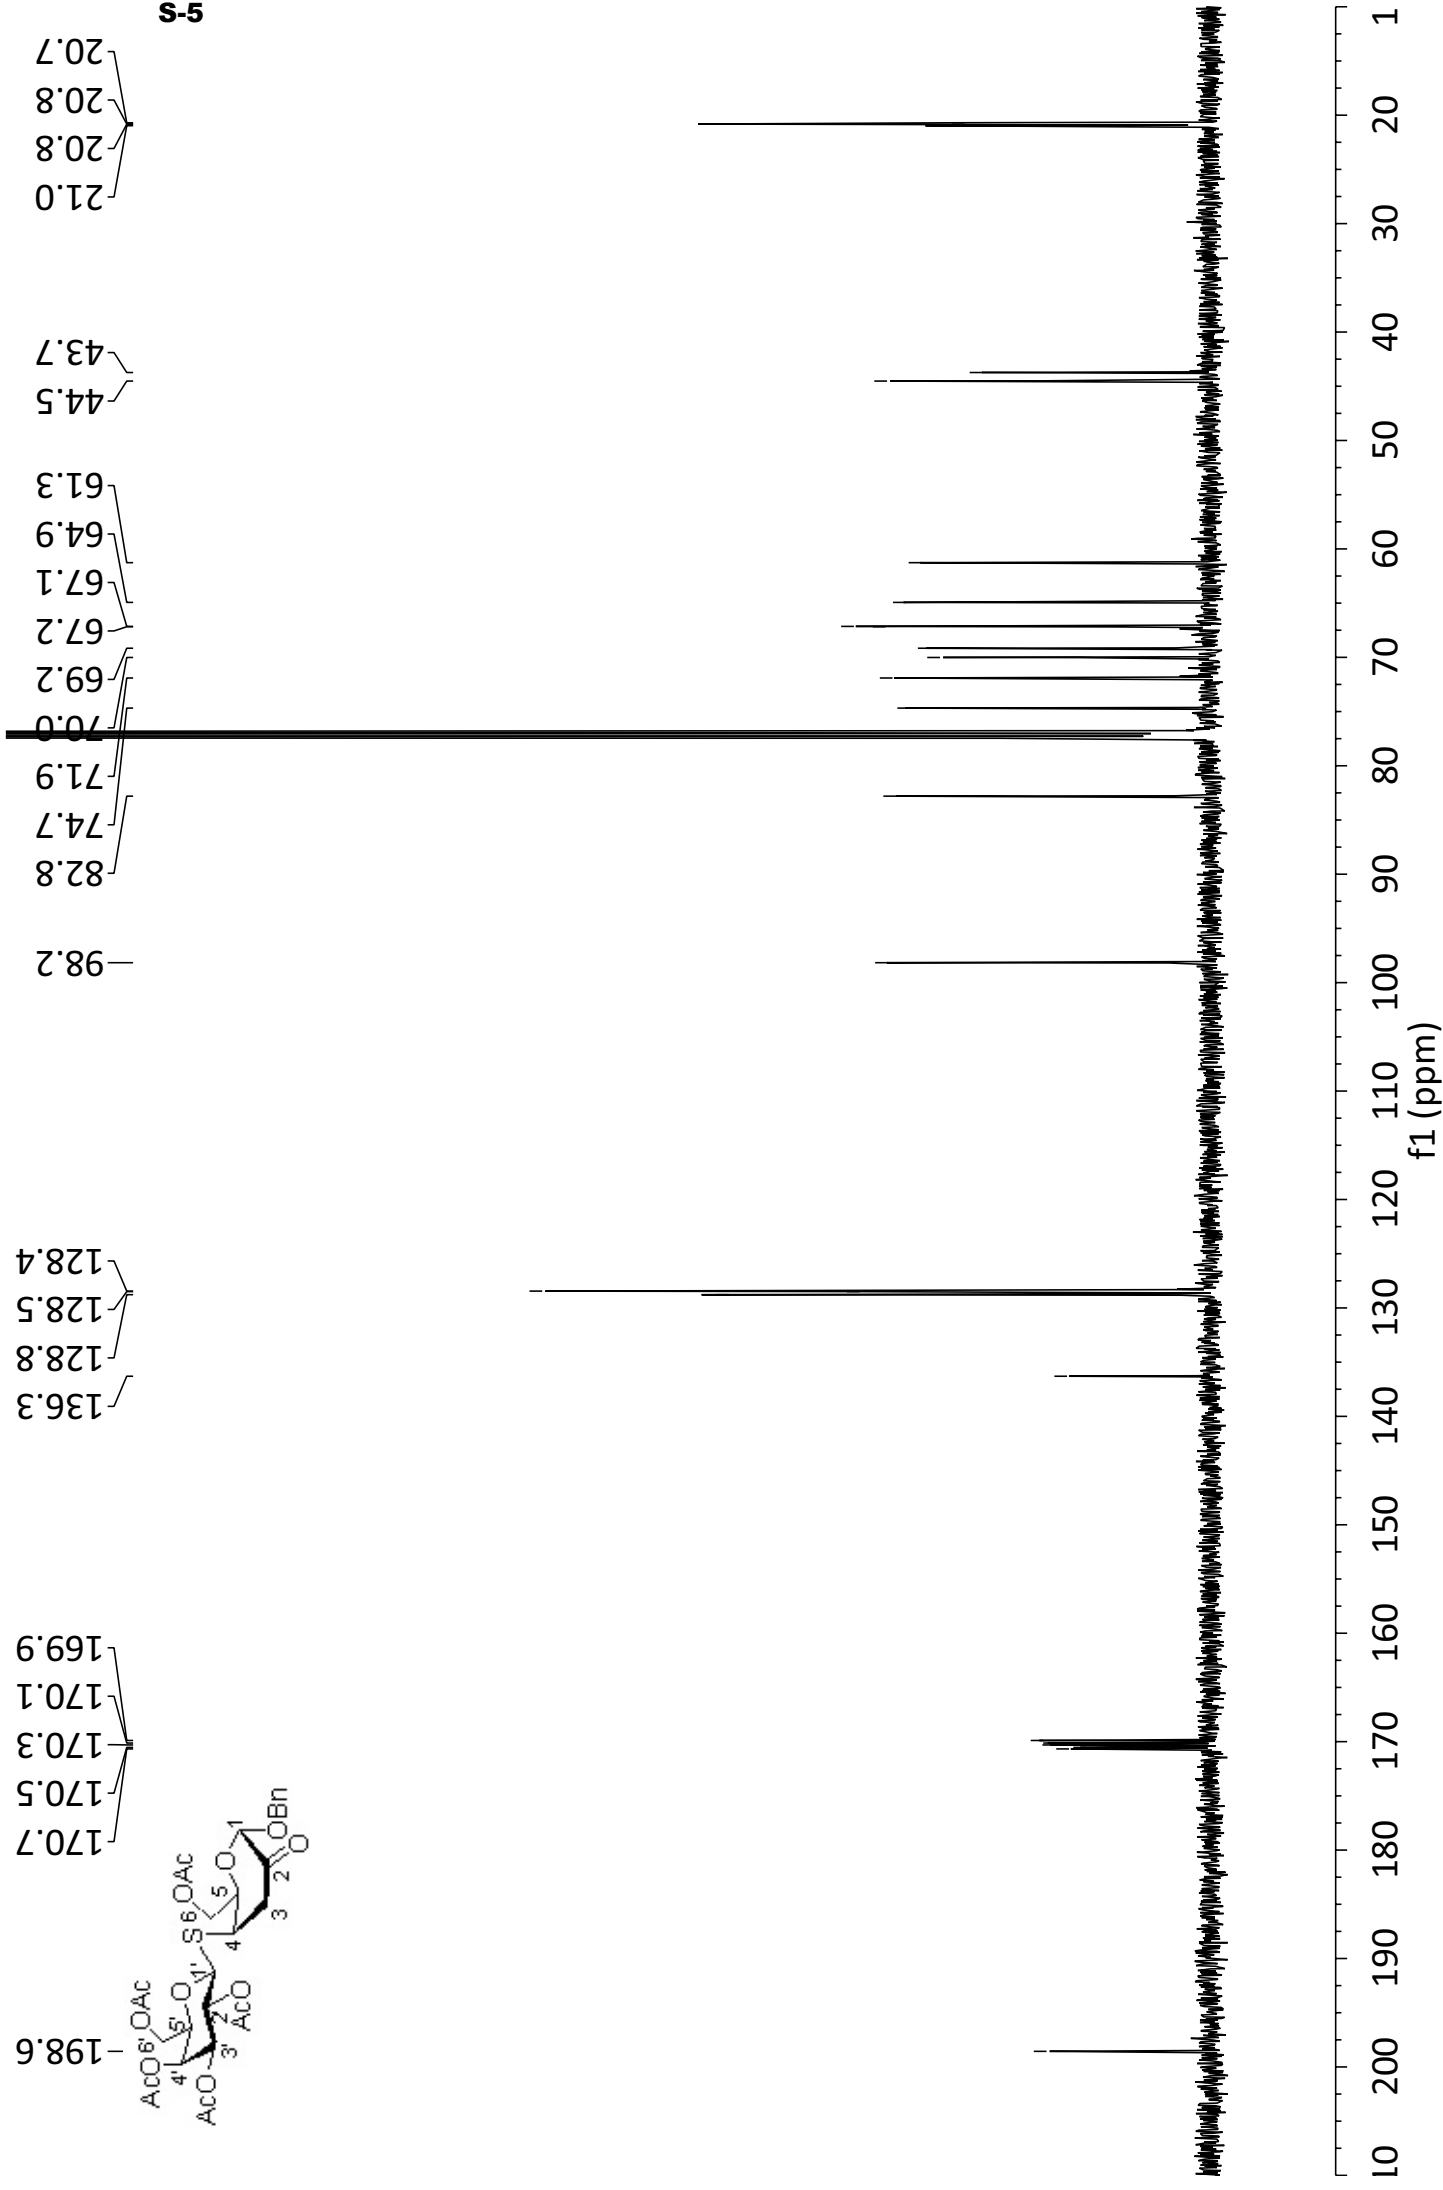

5-5



<sup>13</sup>C-NMR Spectrum of compound **5** (125.7 MHz, CDCl<sub>3</sub>).

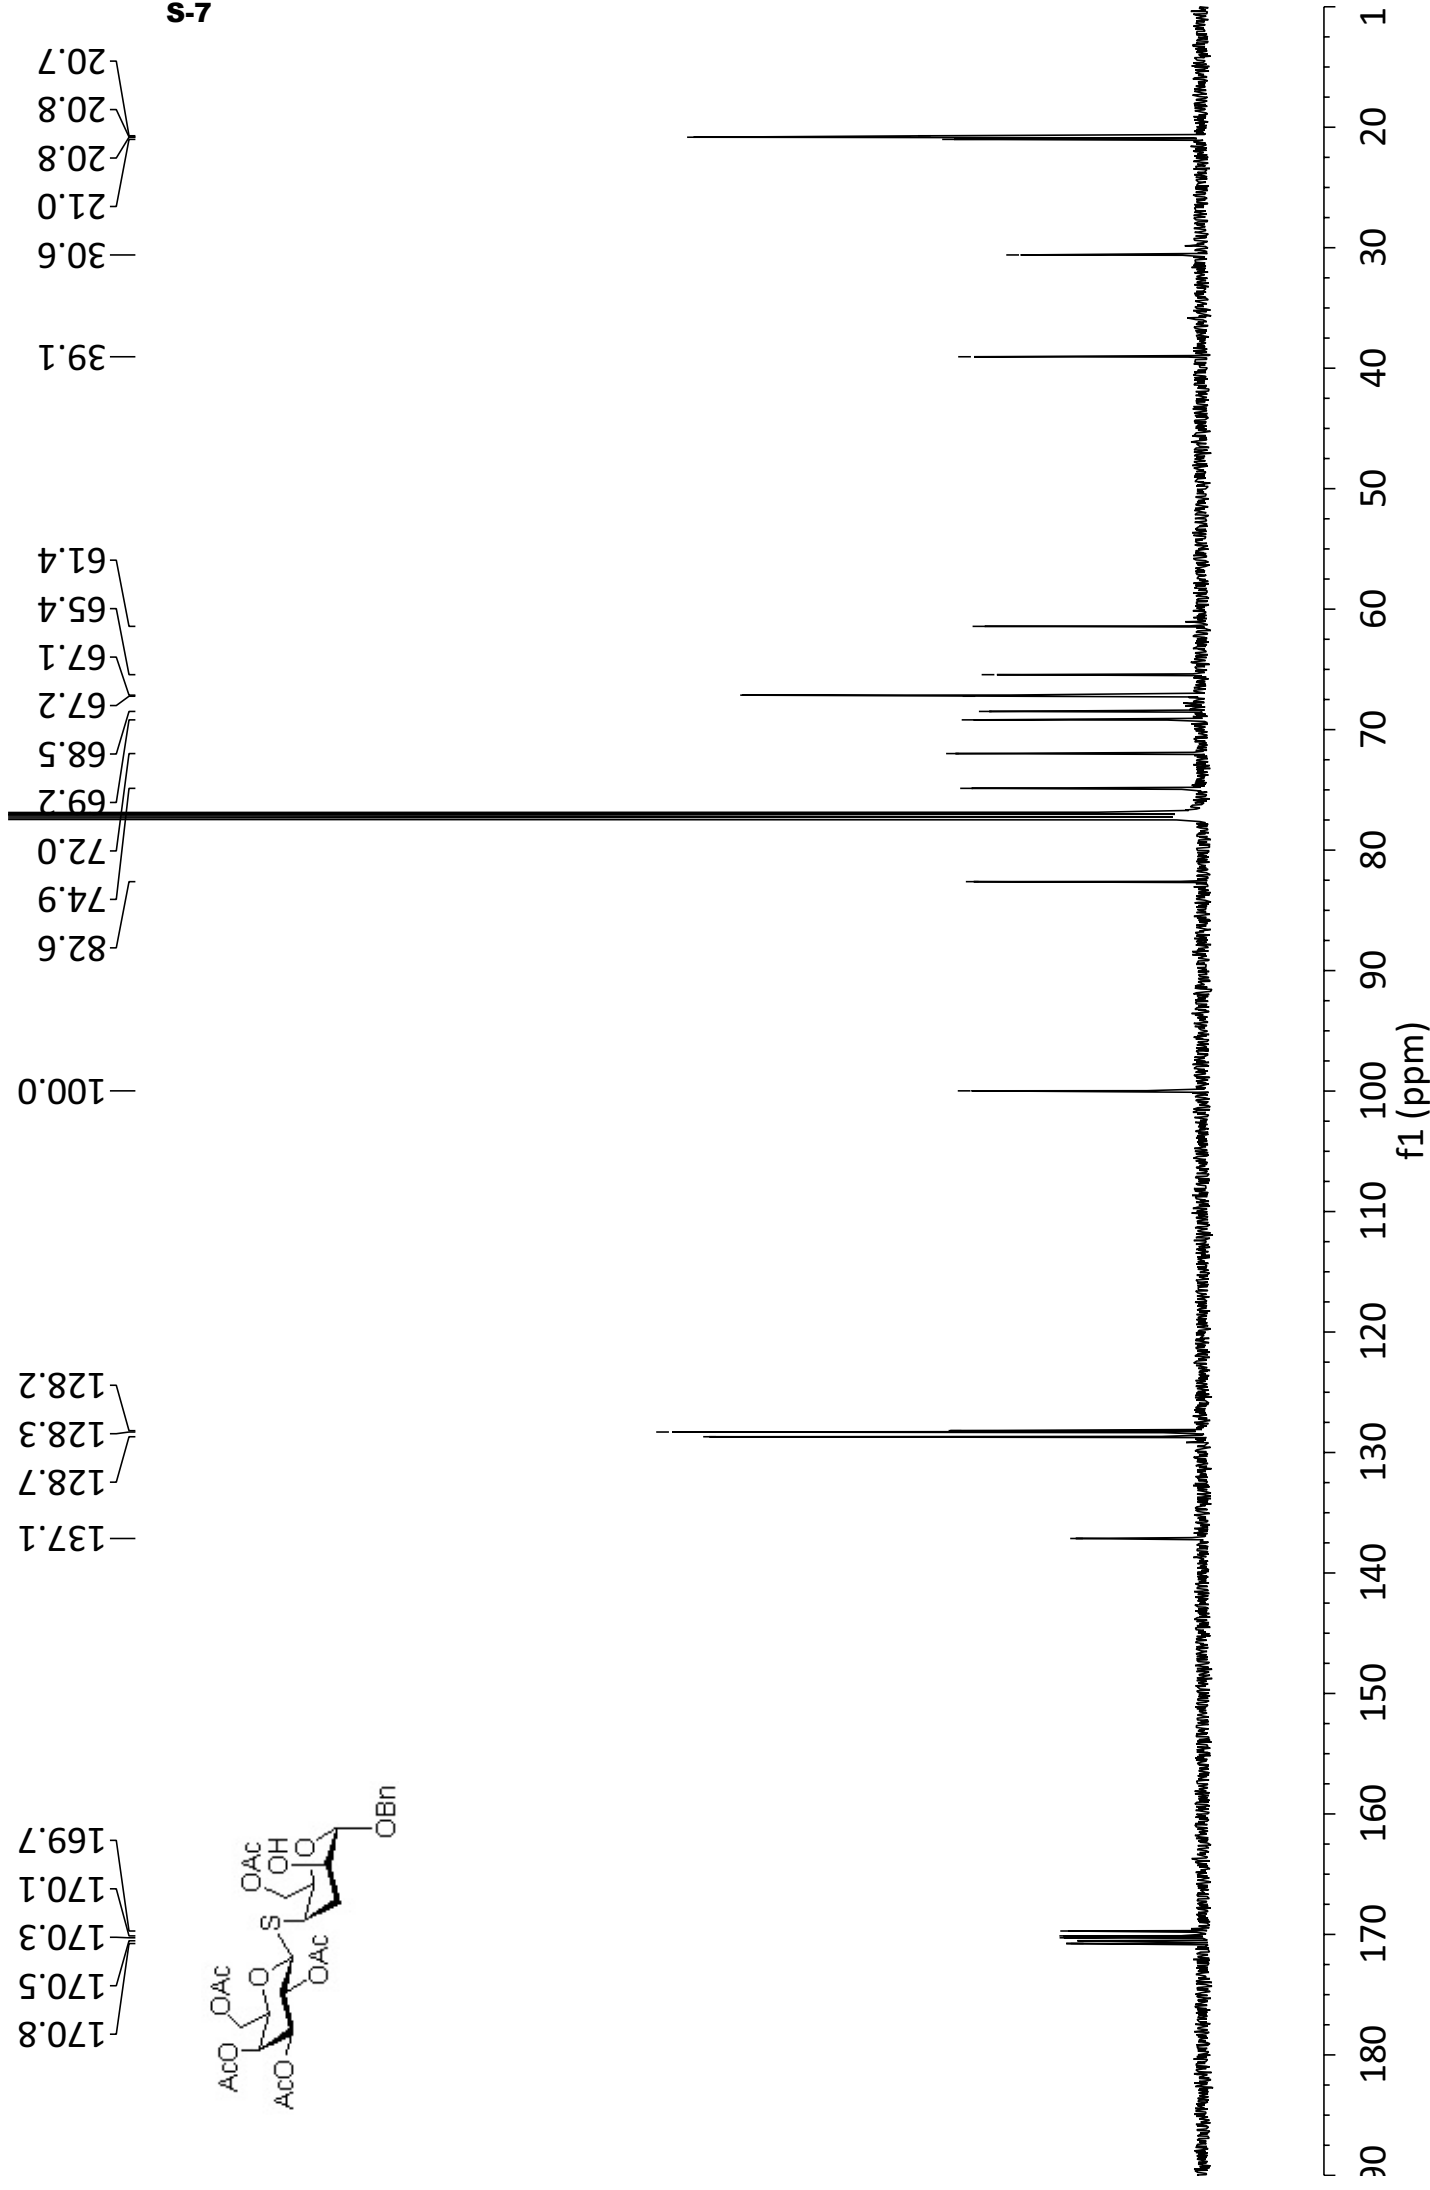

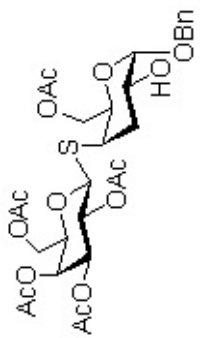

S-8

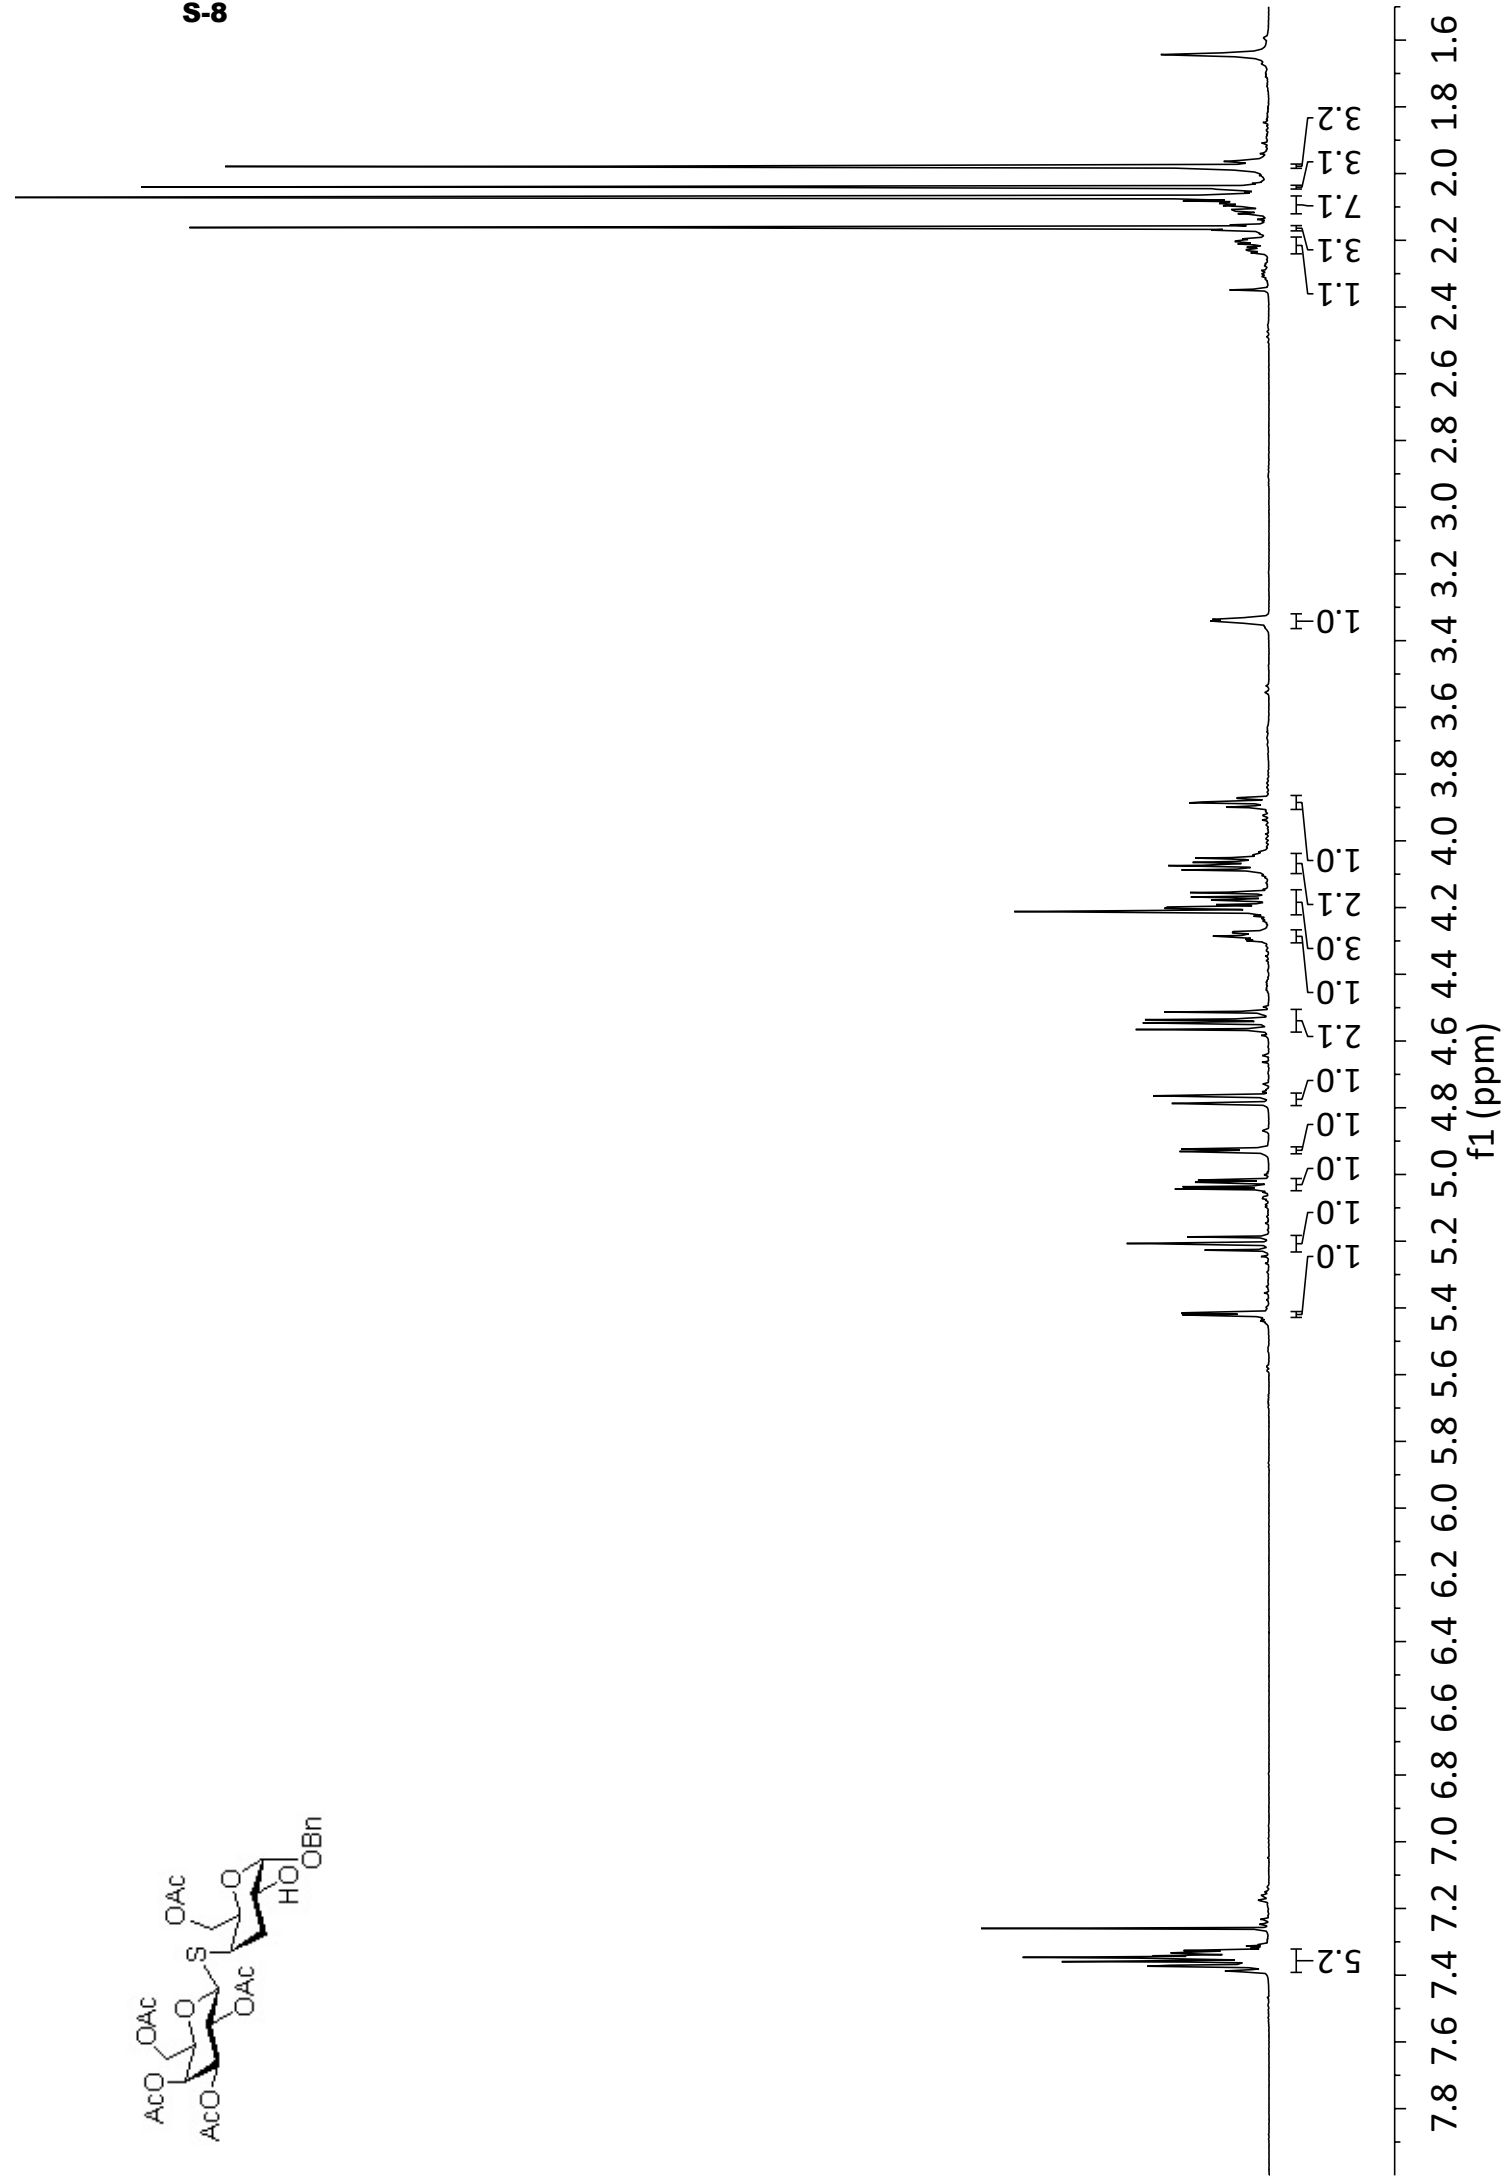

<sup>1</sup>H-NMR Spectrum of compound 6 (500 MHz, CDCl<sub>3</sub>).



<sup>13</sup>C-NMR Spectrum of compound **6** (125.7 MHz, CDCl<sub>3</sub>).

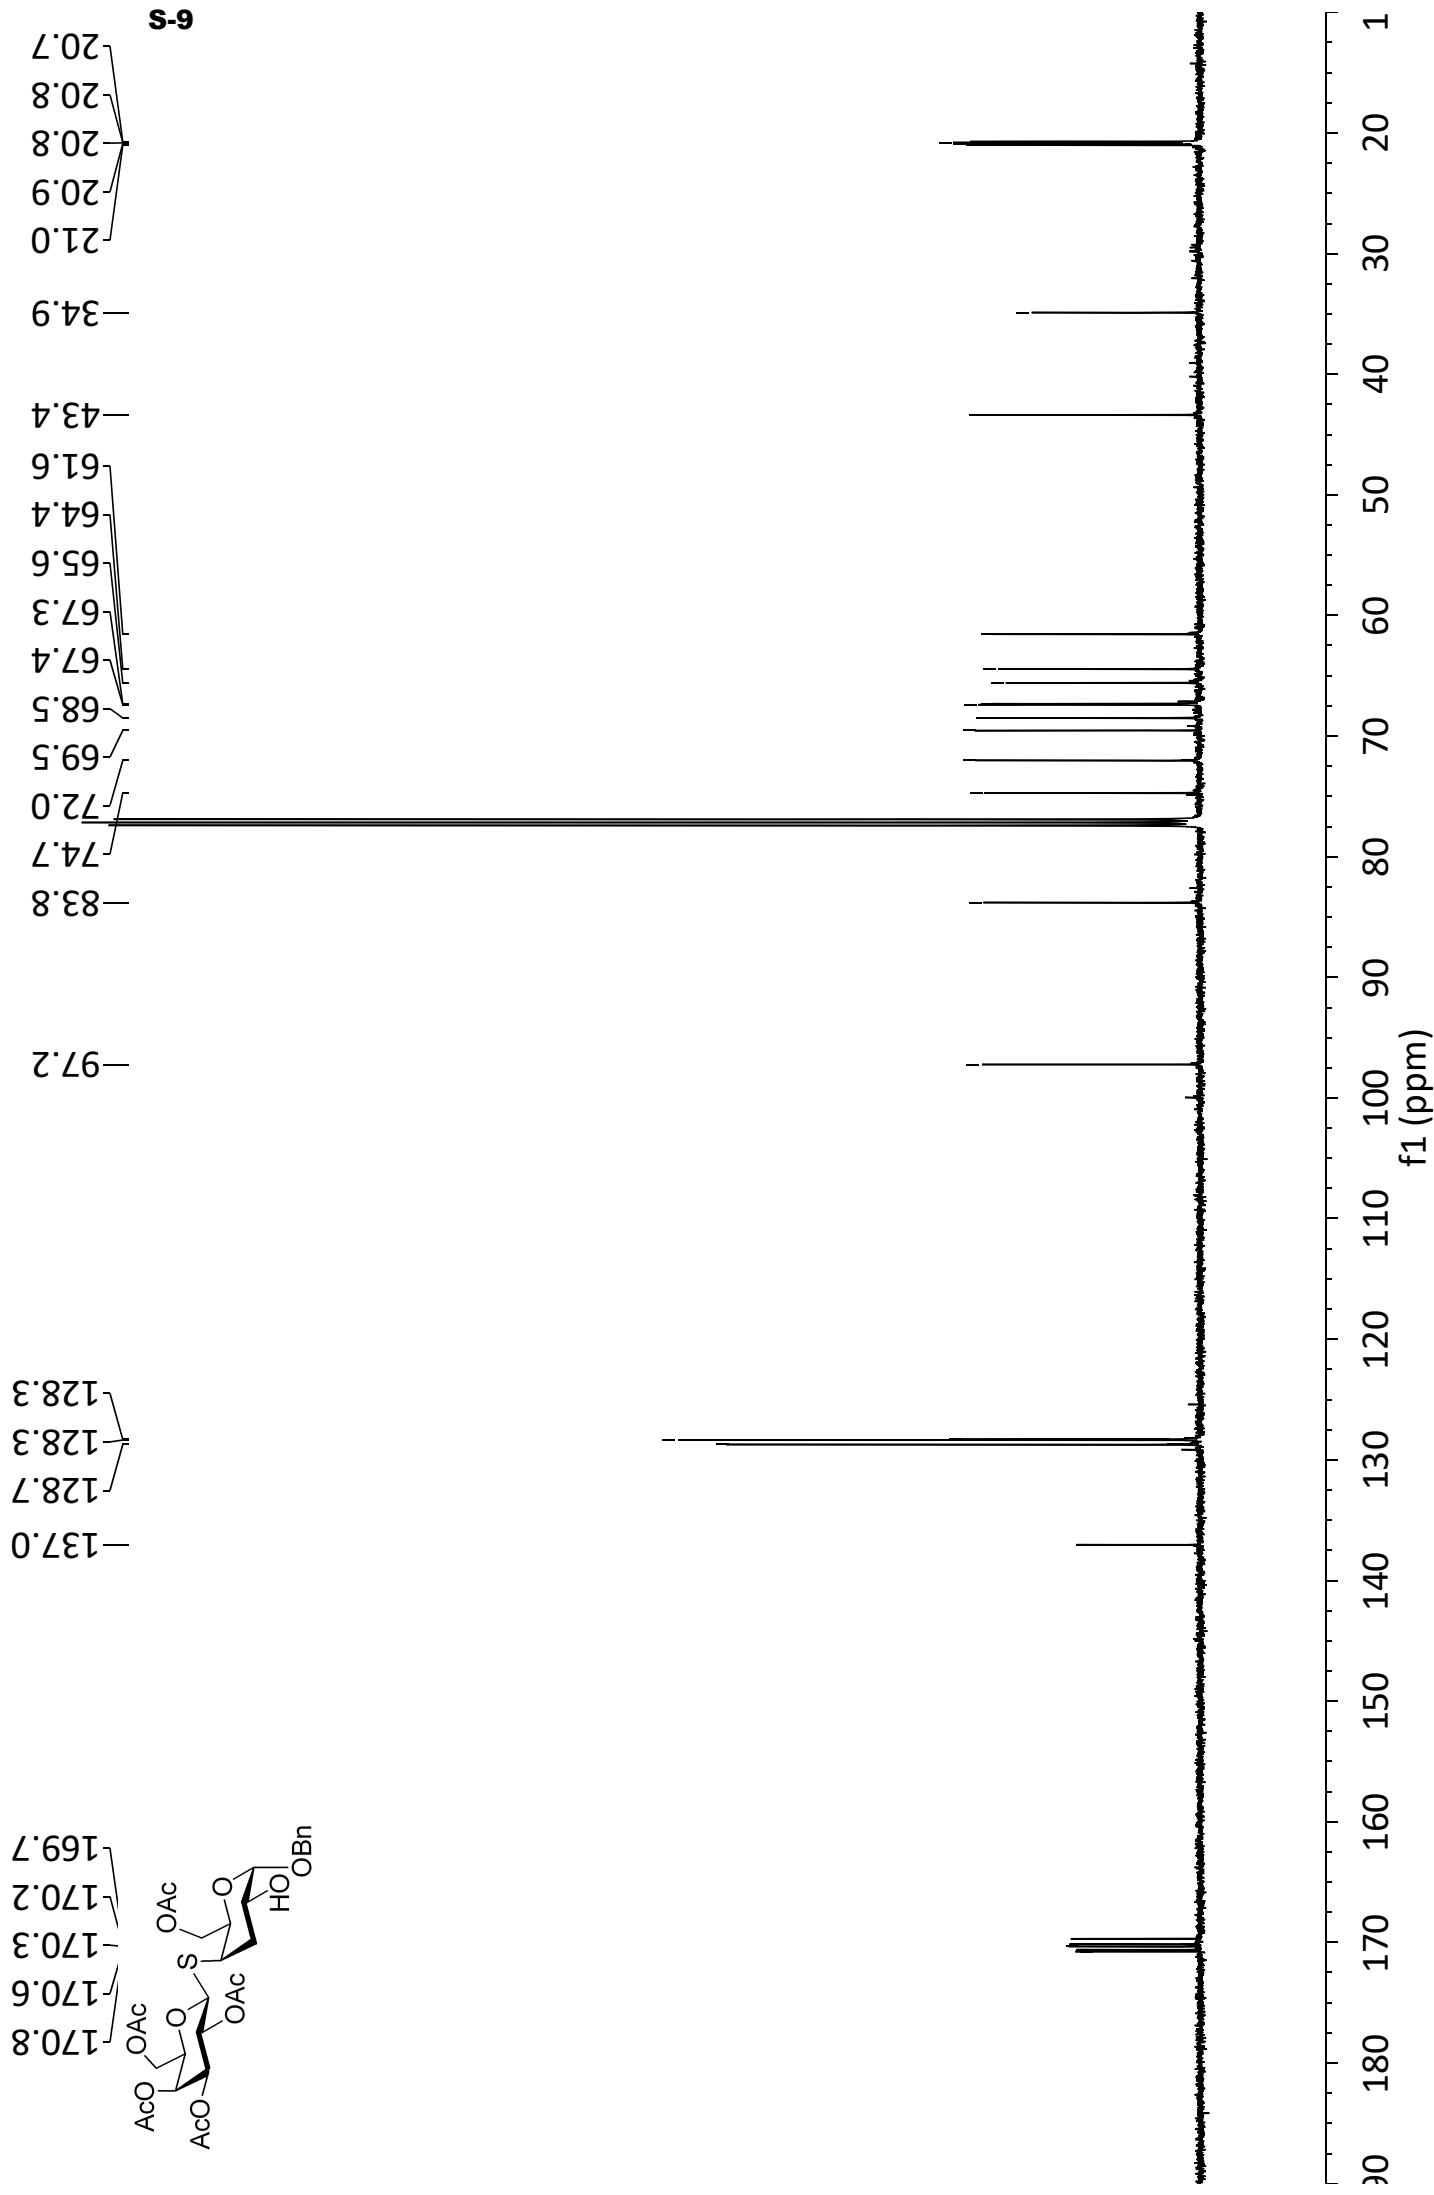

**6-s**

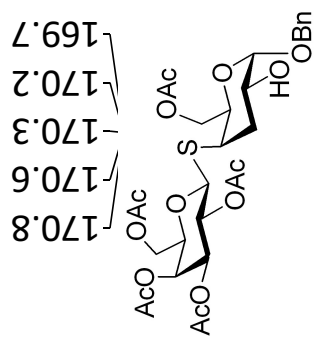



<sup>13</sup>C-NMR Spectrum of compound 7 (125.7 MHz, CDCl<sub>3</sub>).

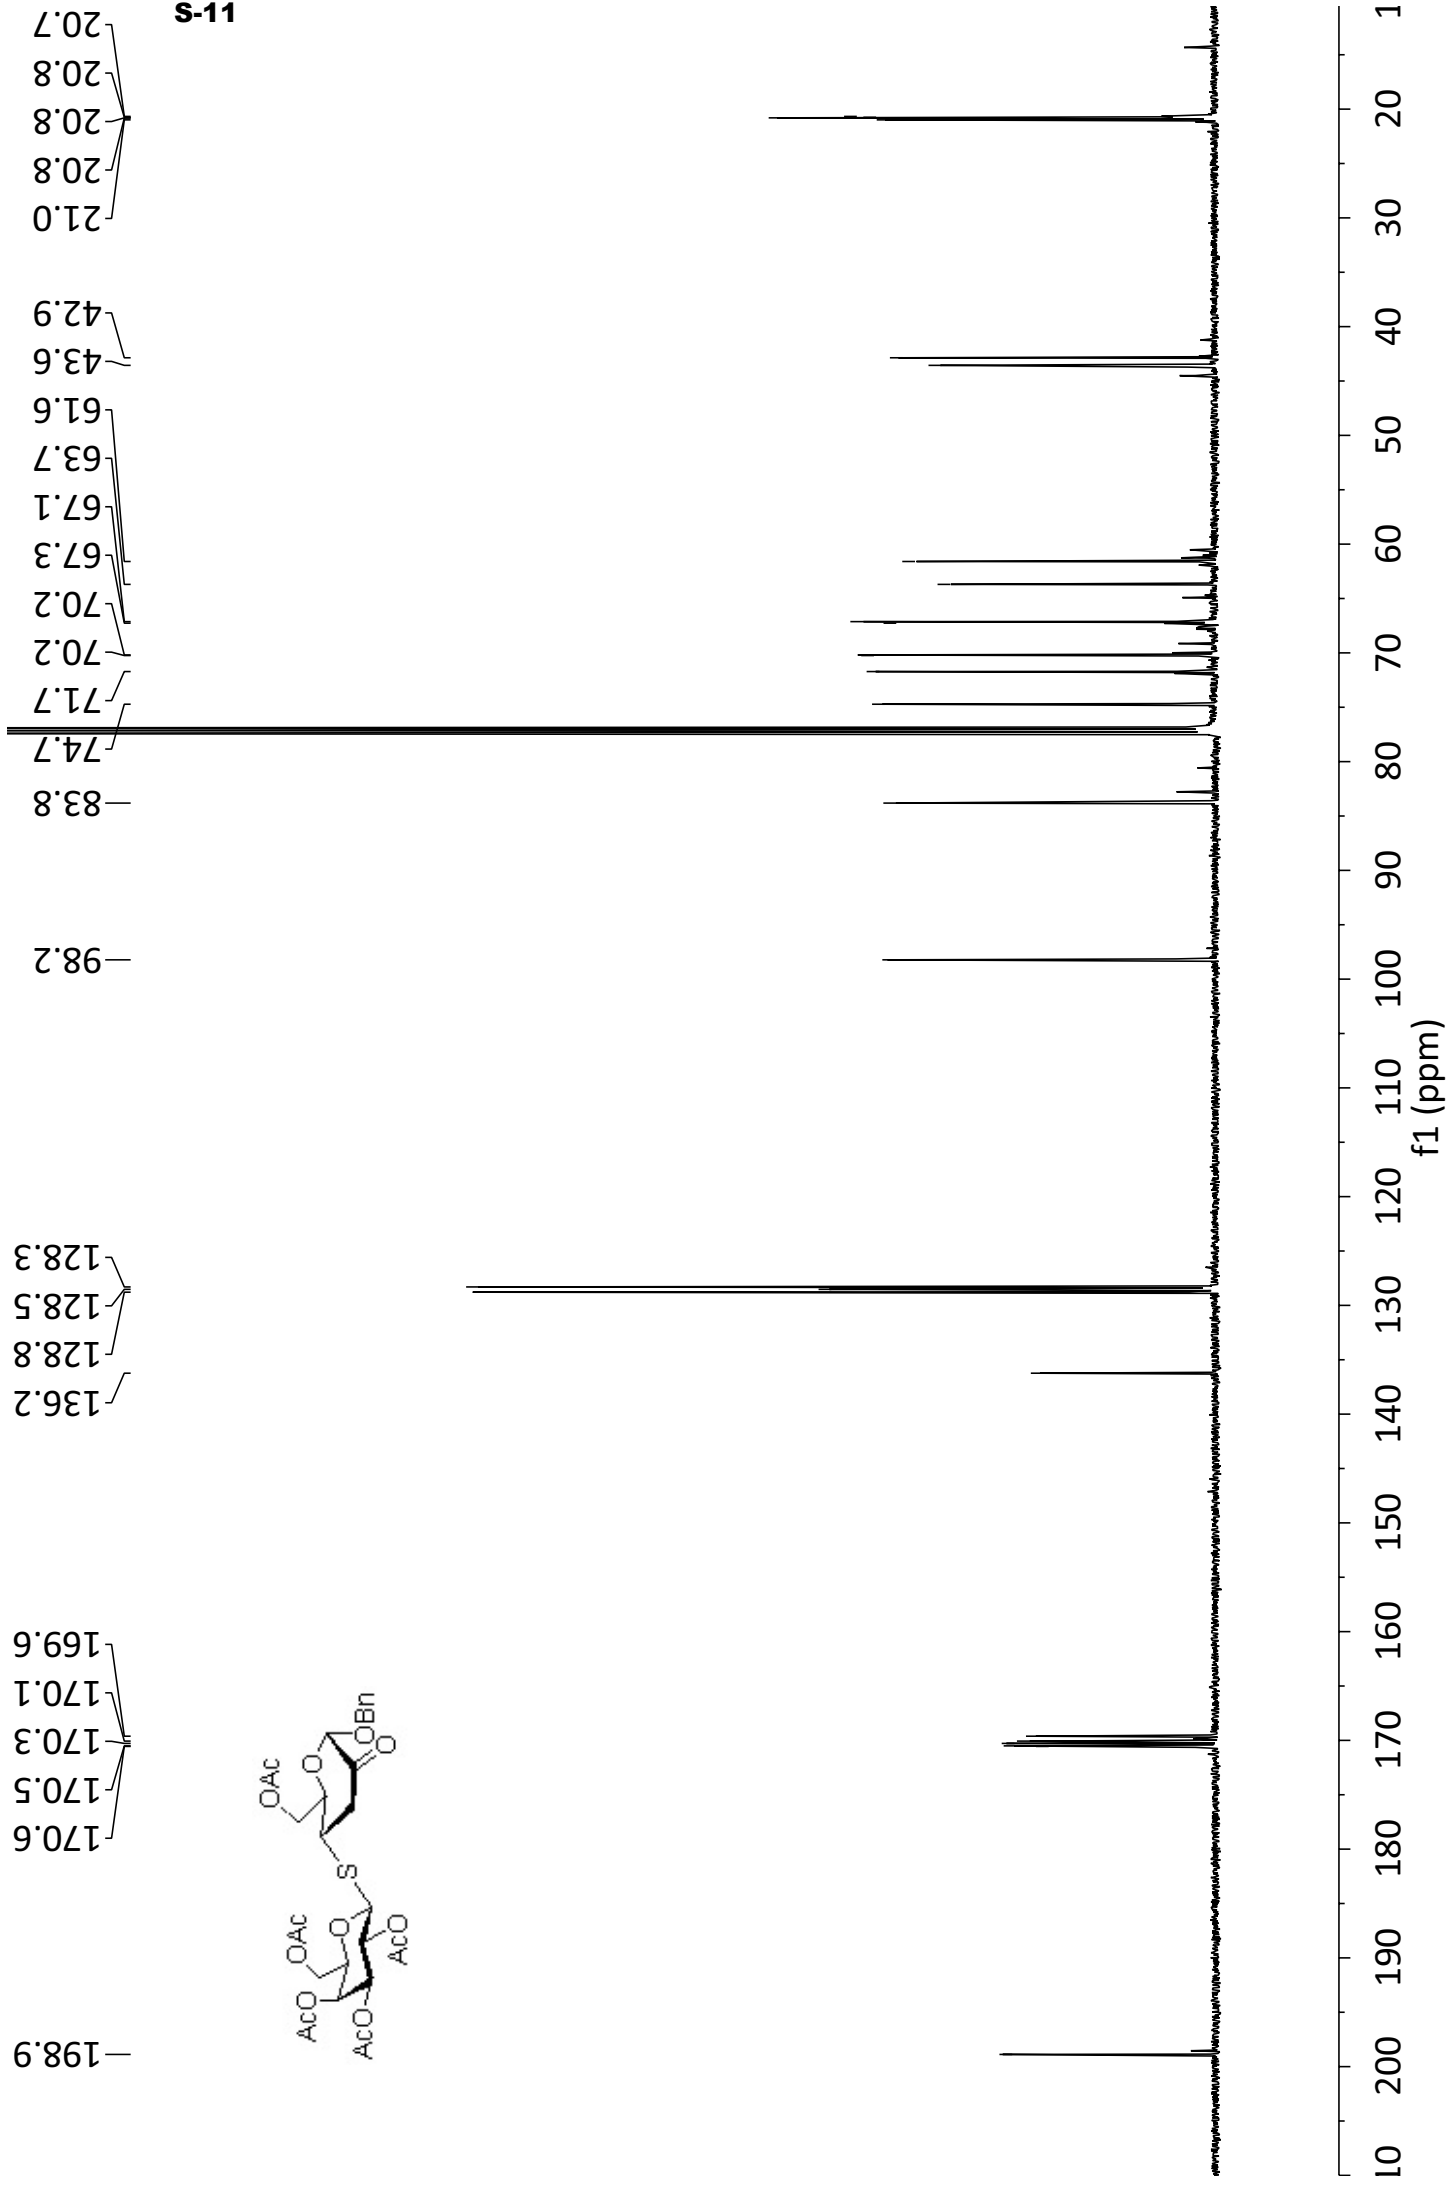

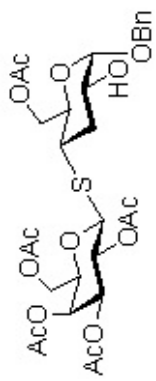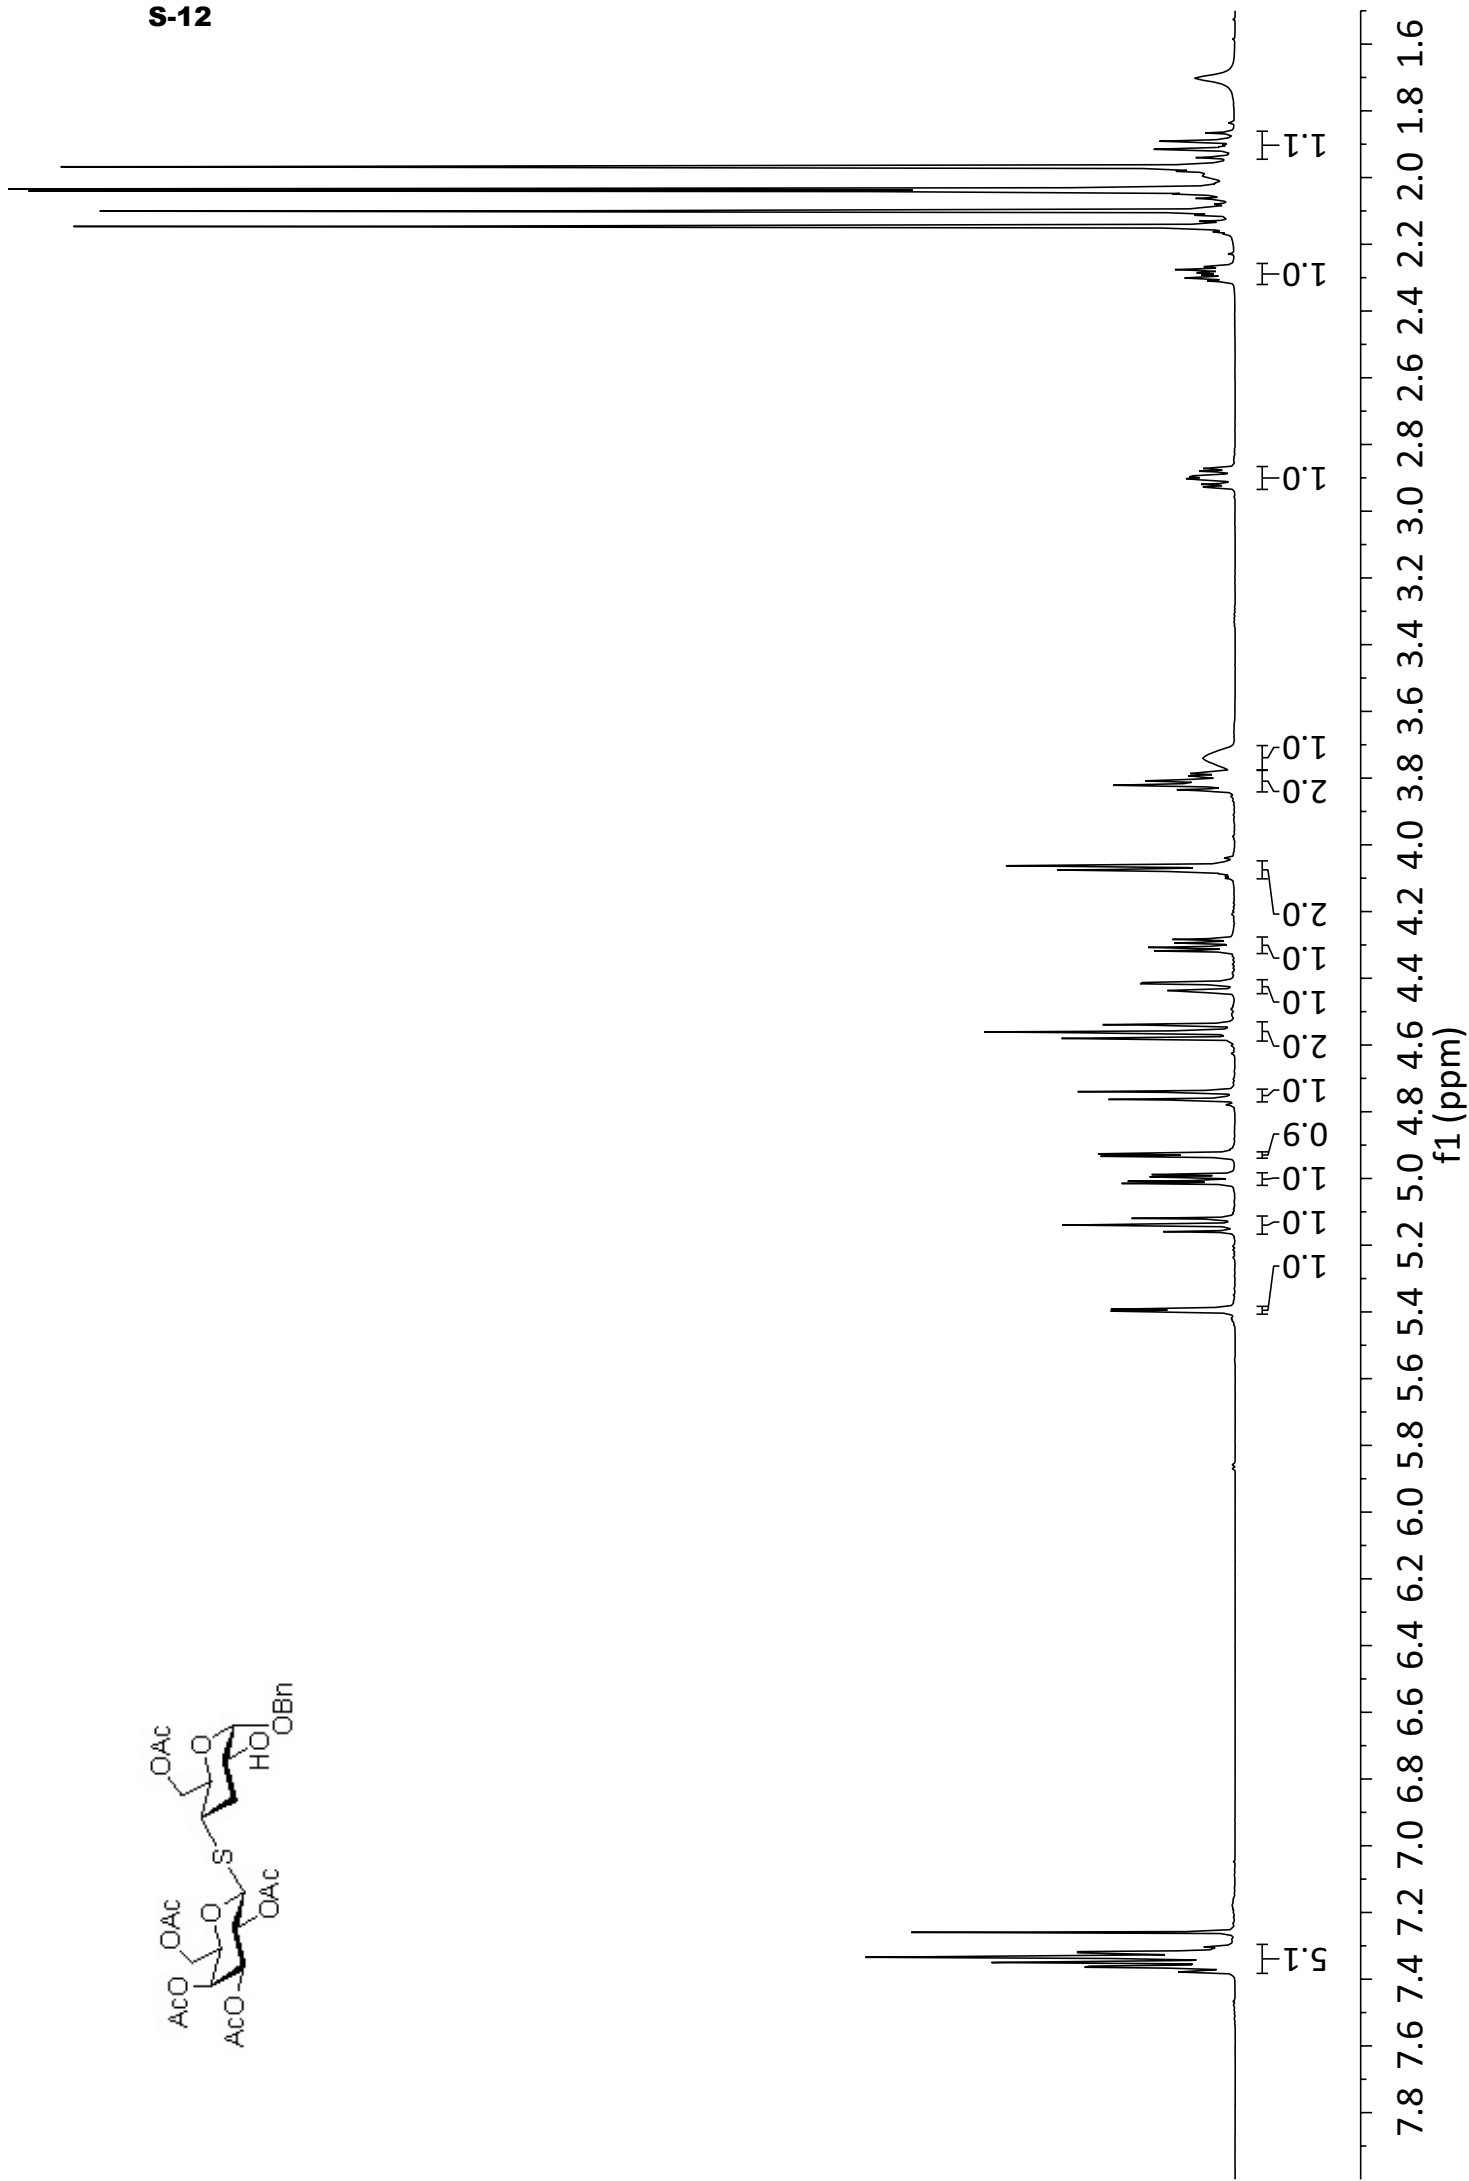

<sup>13</sup>C-NMR Spectrum of compound **8** (125.7 MHz, CDCl<sub>3</sub>).

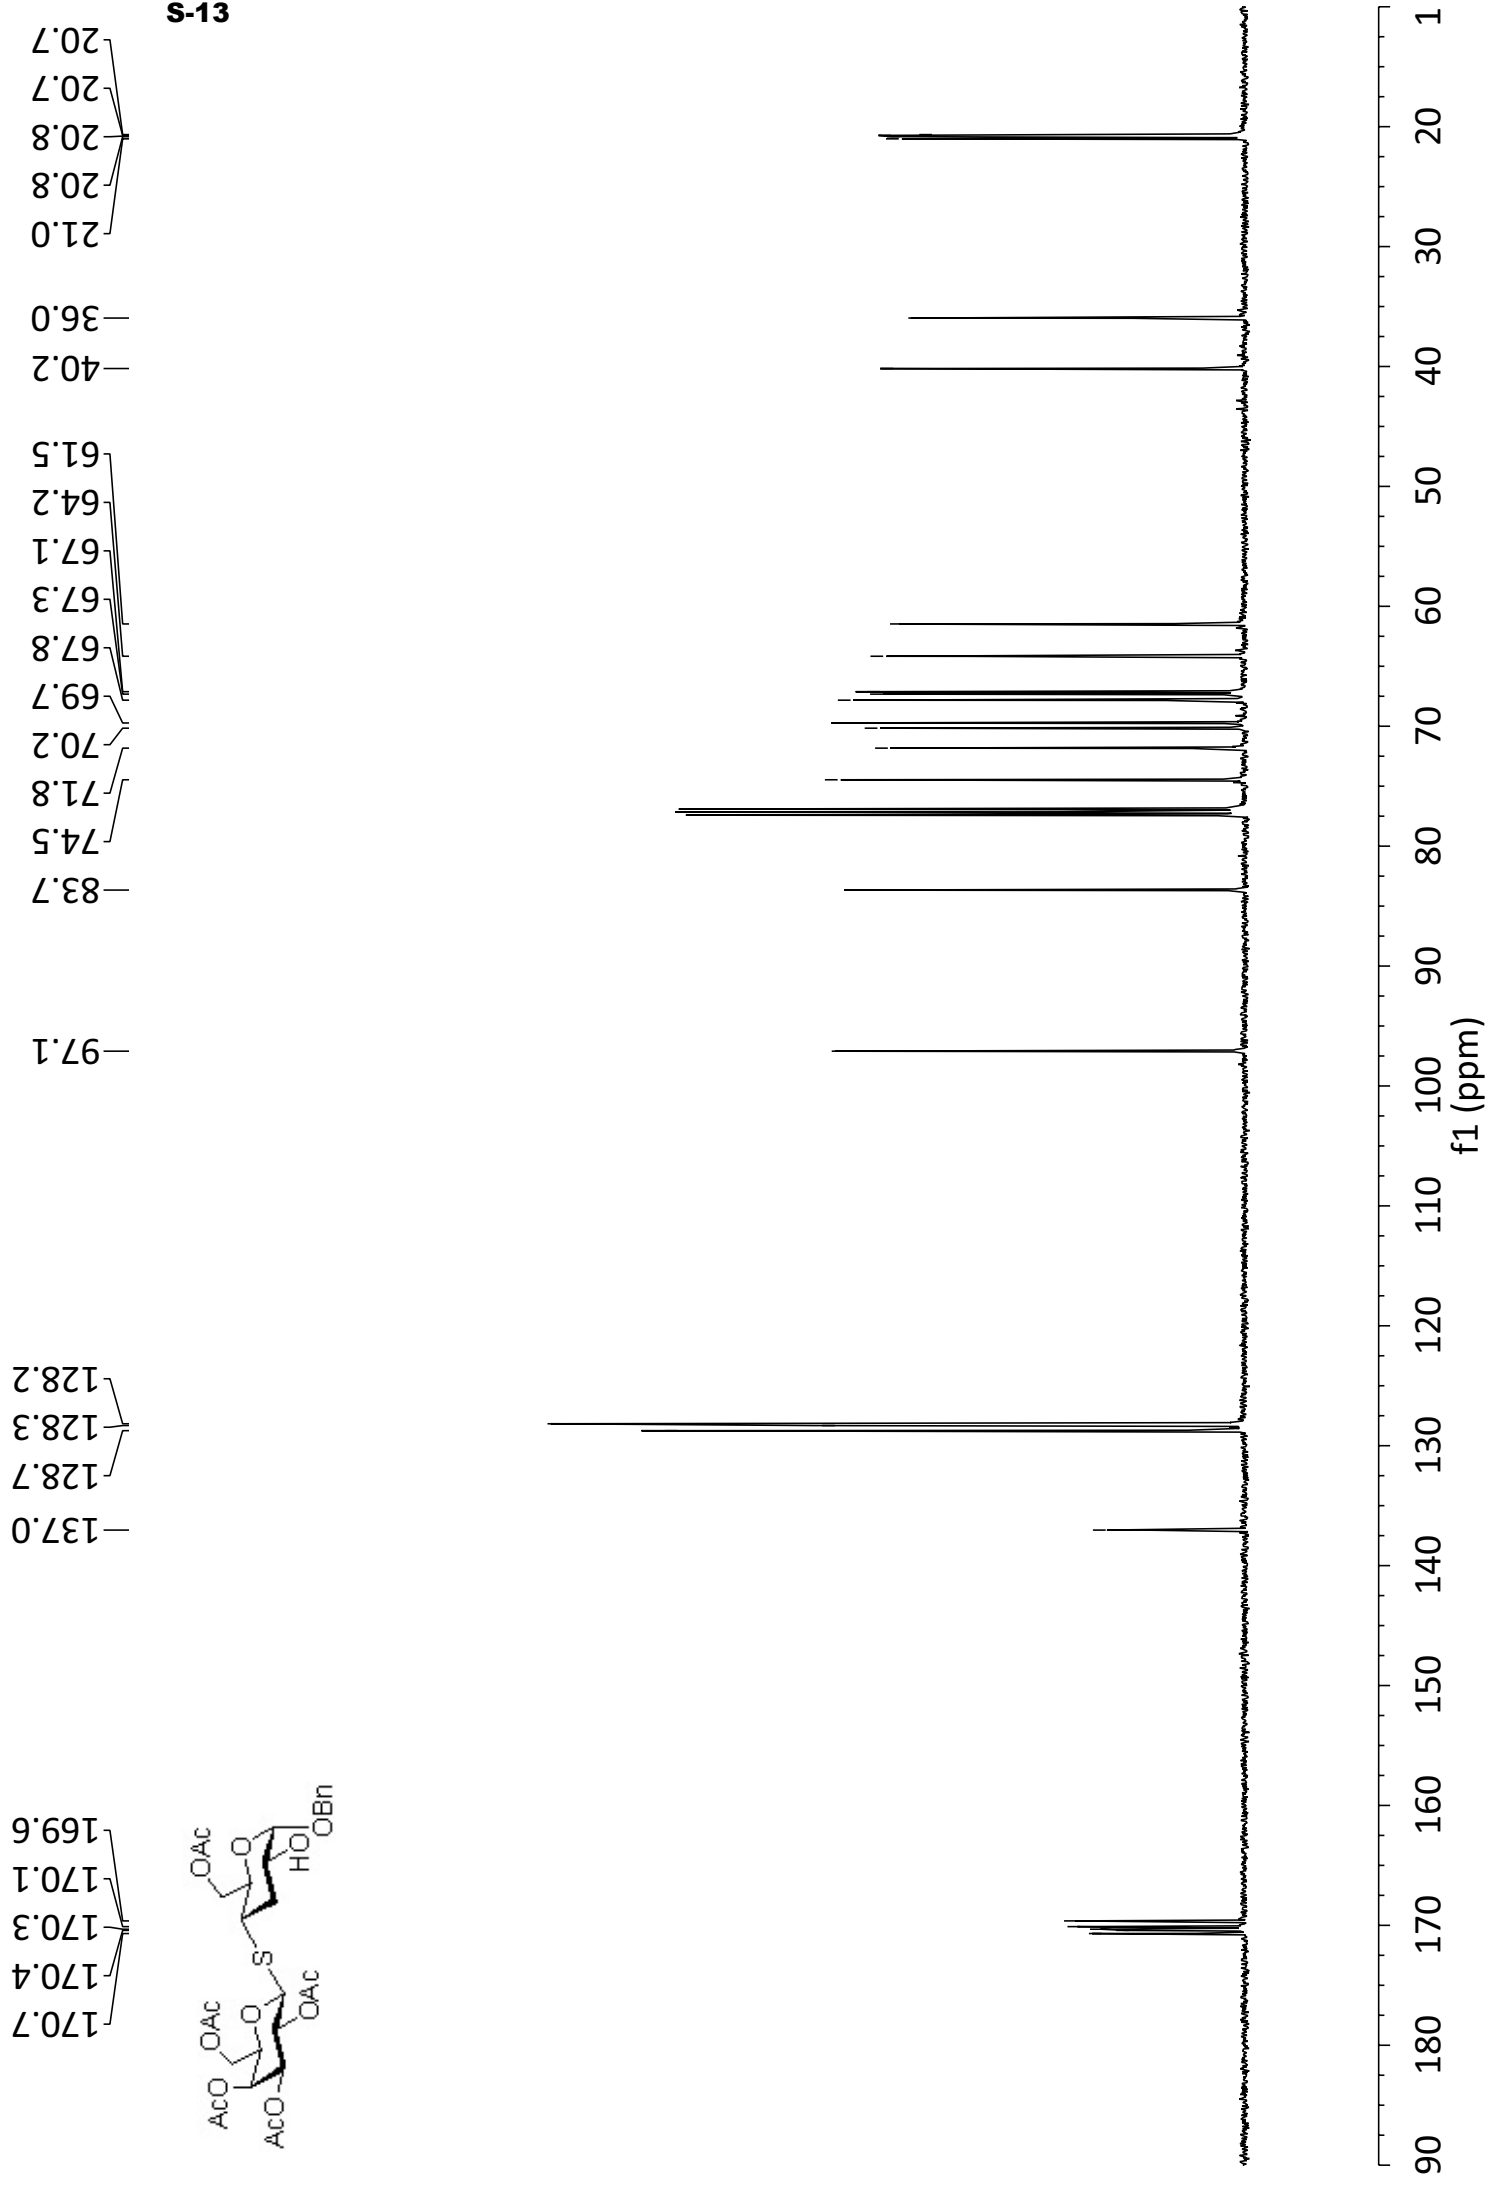

S-13

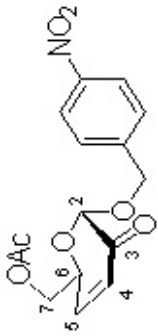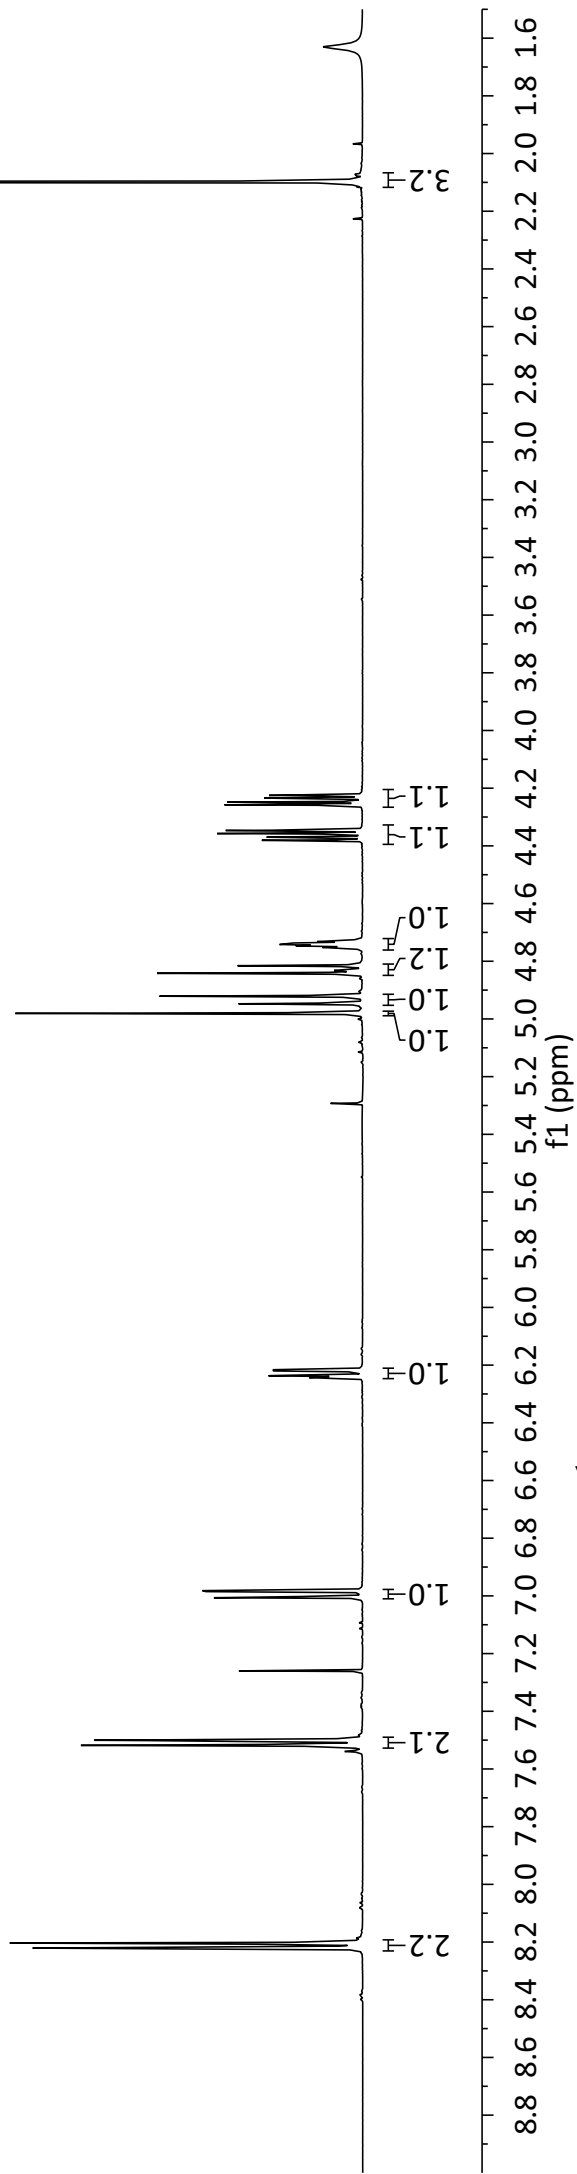

<sup>1</sup>H-NMR Spectrum of compound **10** (500 MHz, CDCl<sub>3</sub>).

<sup>13</sup>C-NMR Spectrum of compound **10** (125.7 MHz, CDCl<sub>3</sub>).

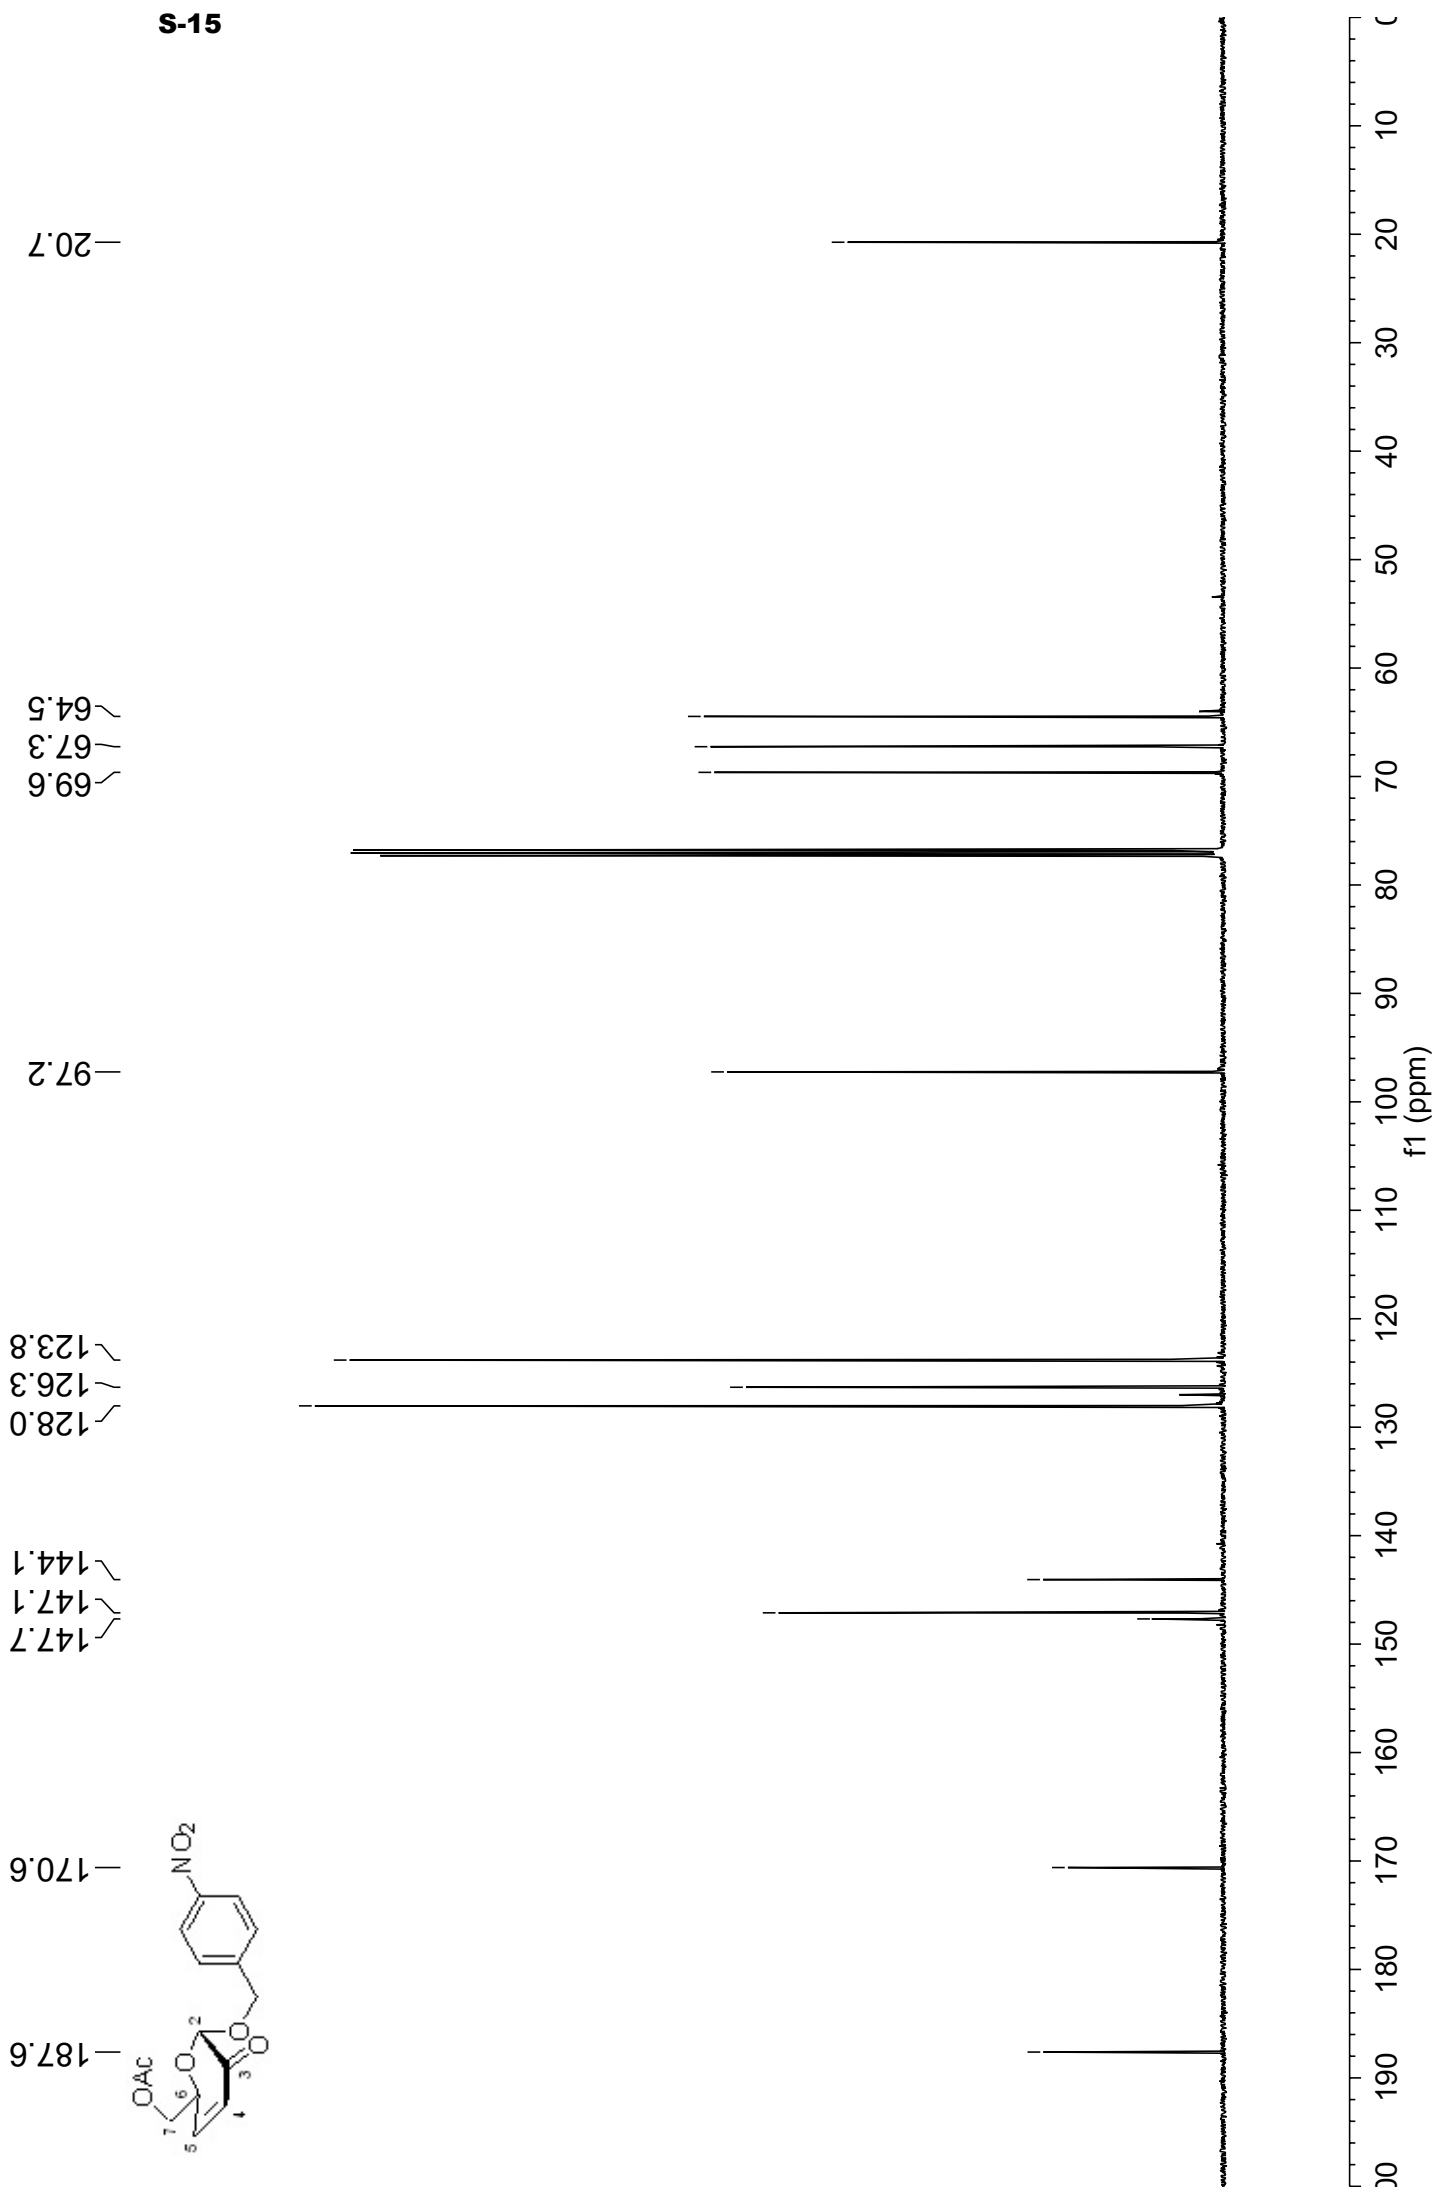

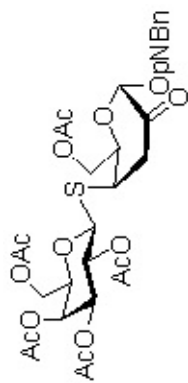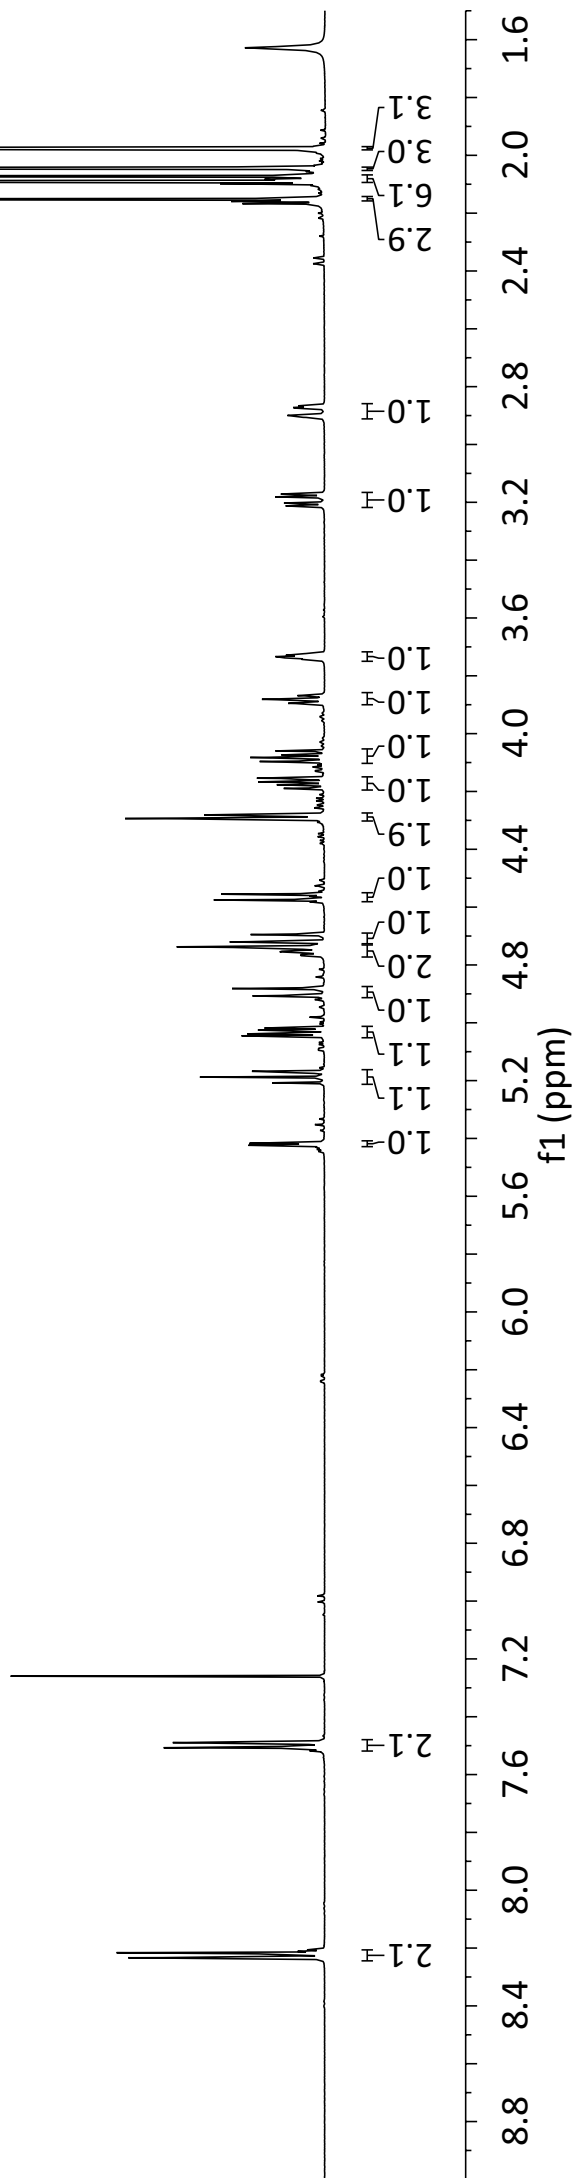



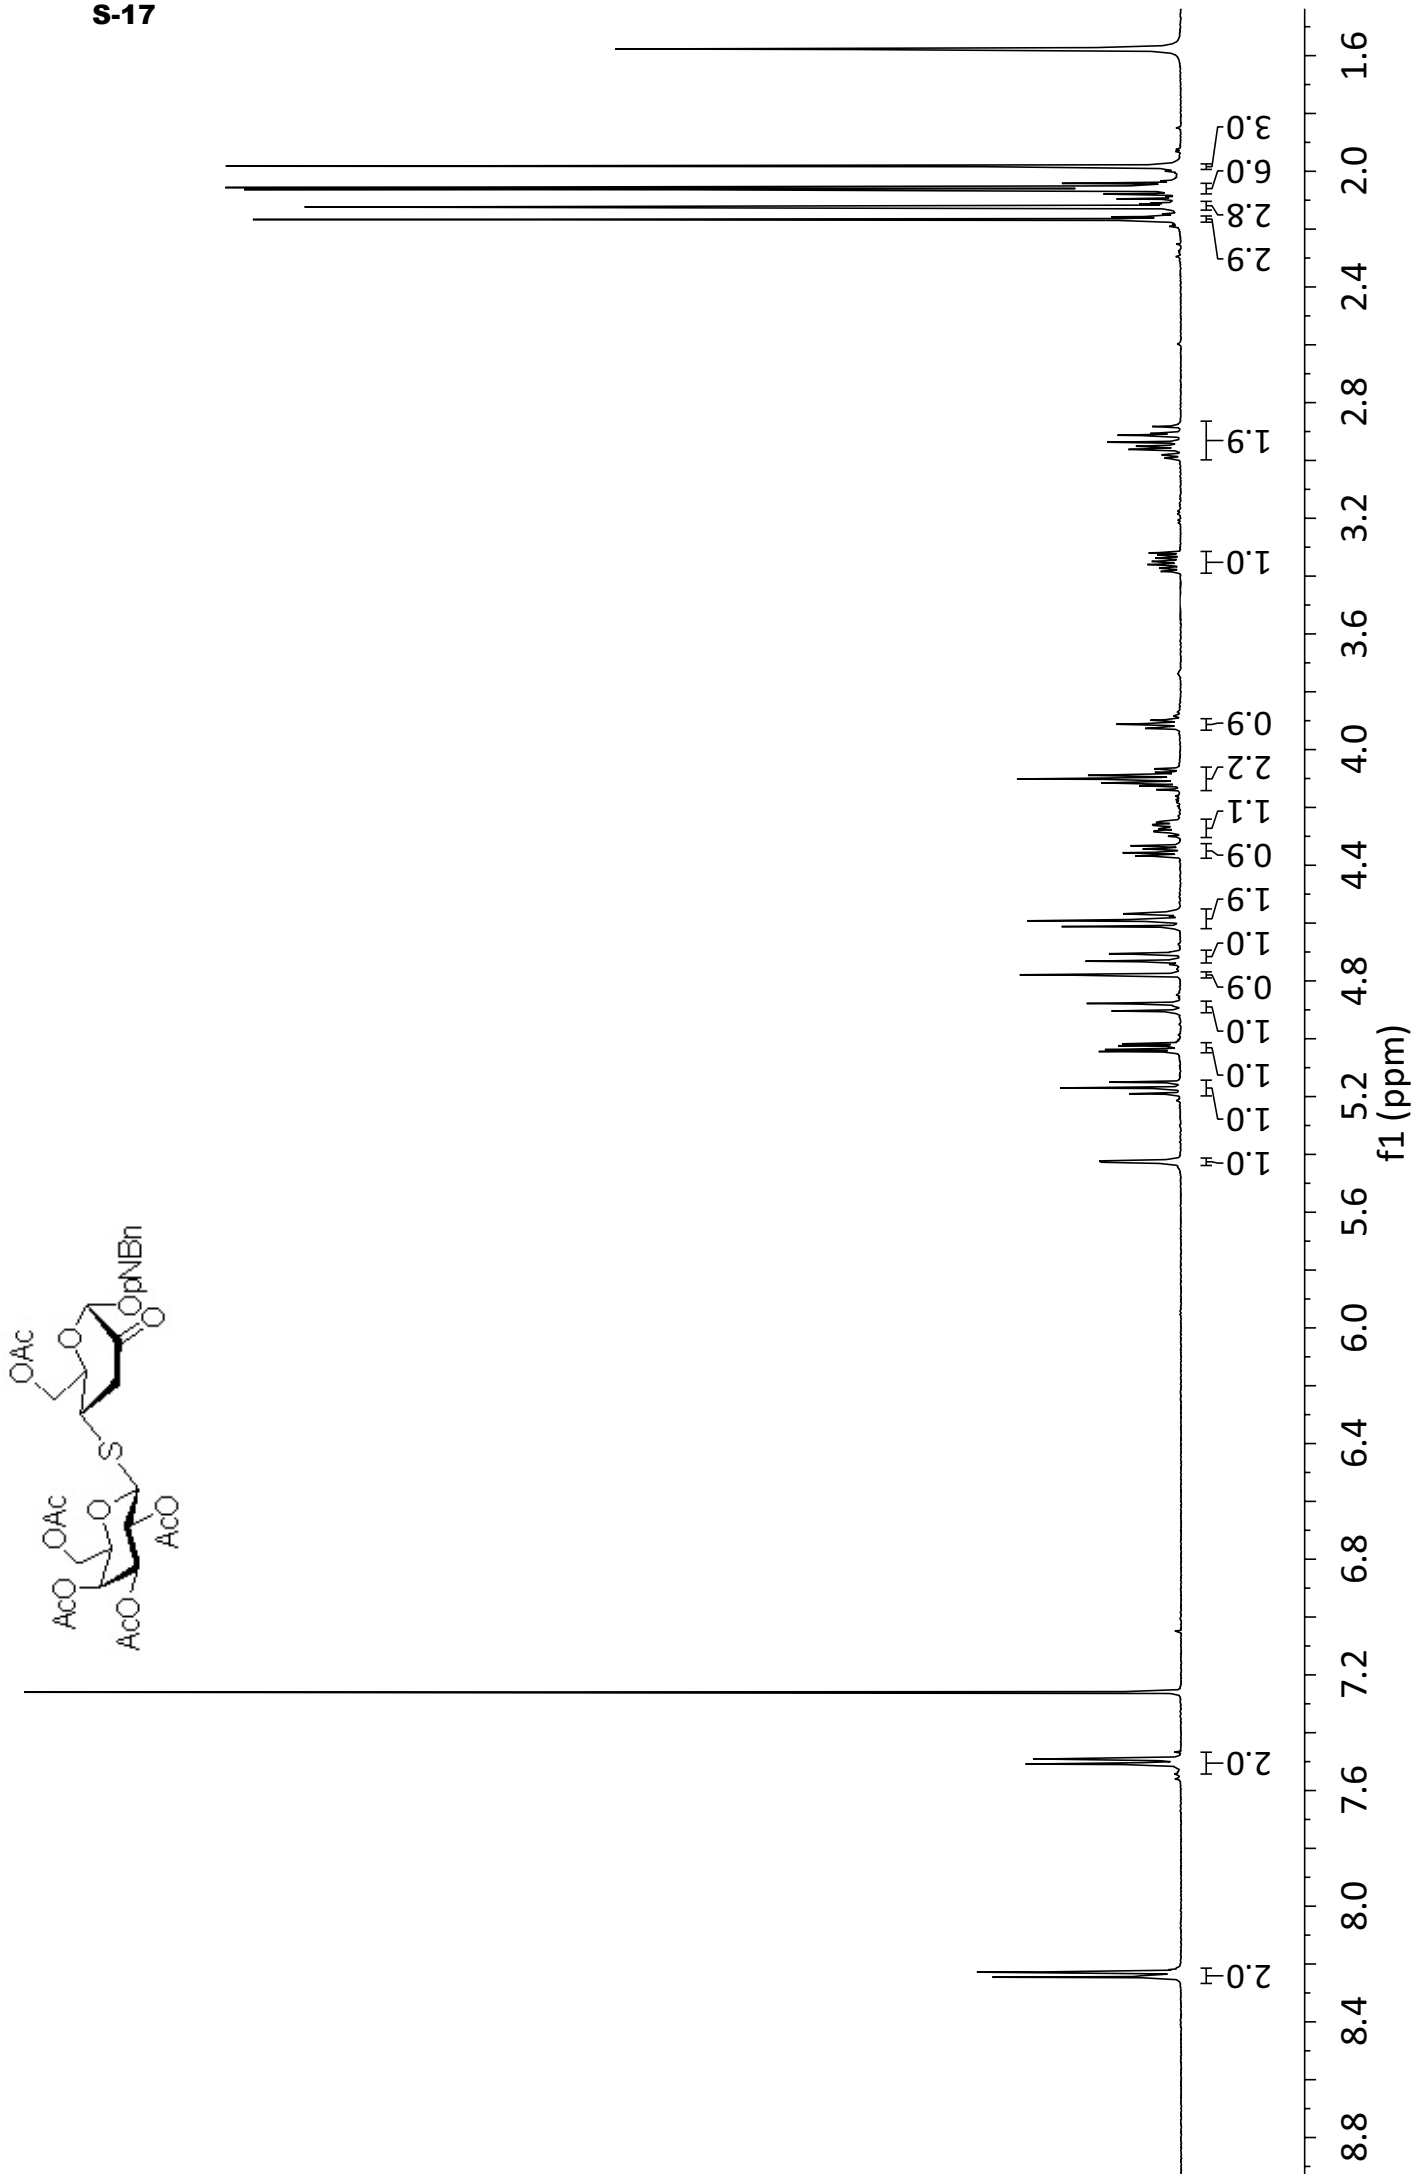

<sup>1</sup>H-NMR Spectrum of compound **12** (500 MHz, CDCl<sub>3</sub>).

<sup>13</sup>C-NMR Spectrum of compound **11** (125.7 MHz, CDCl<sub>3</sub>).

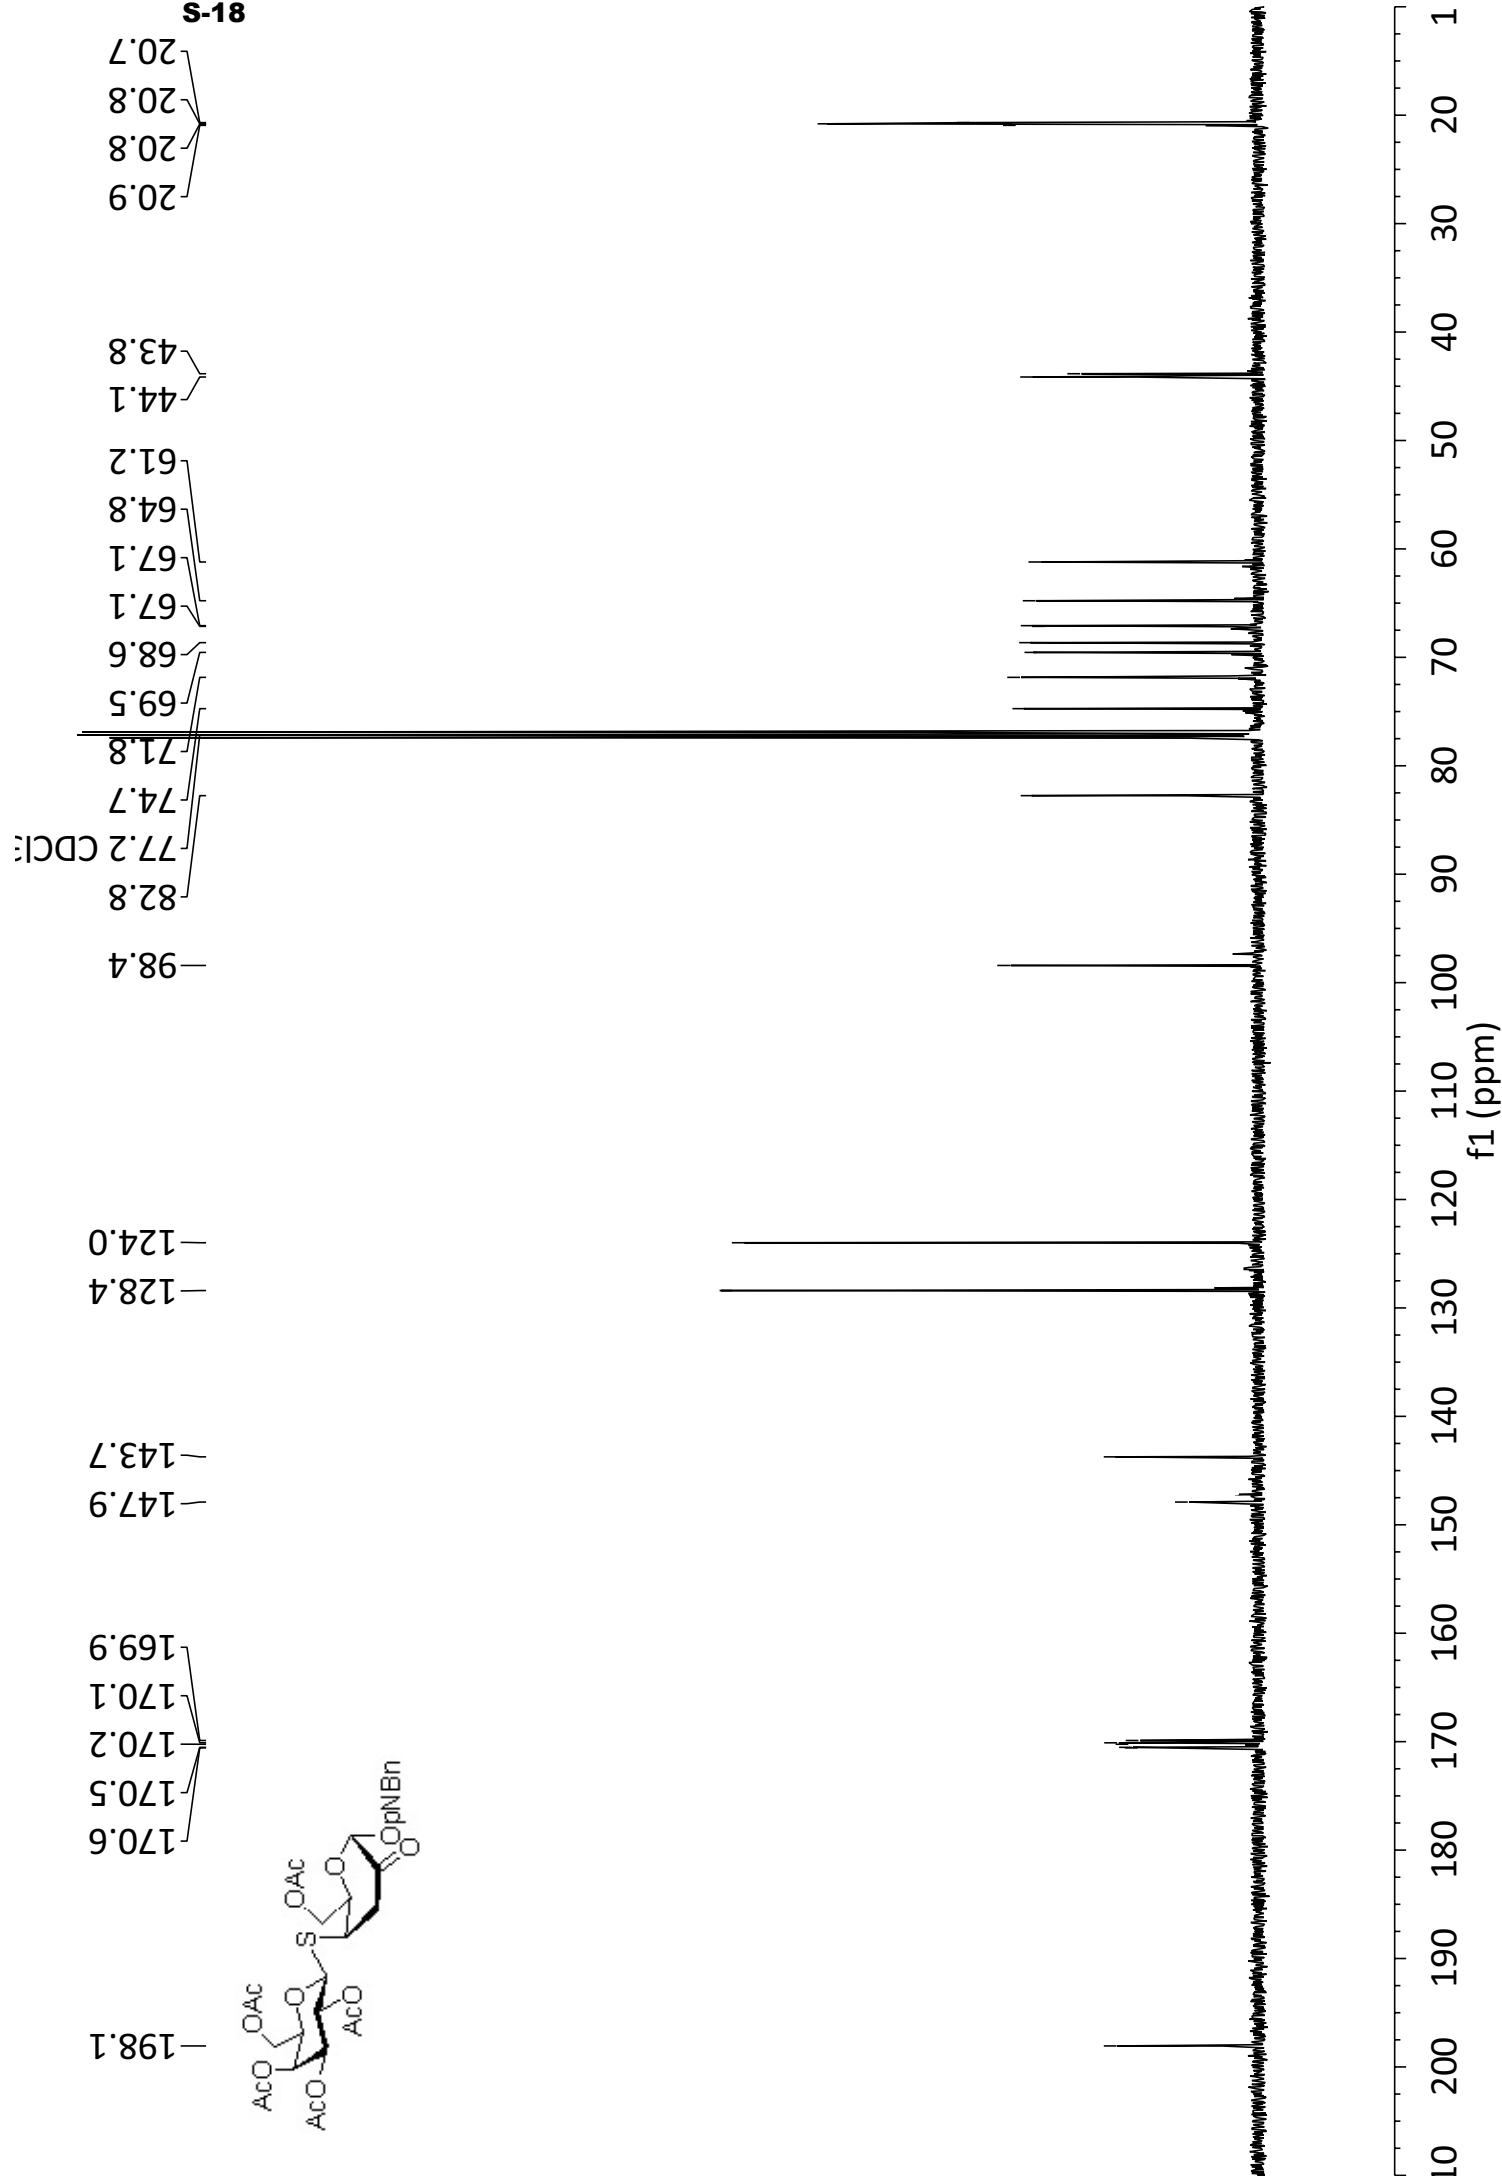

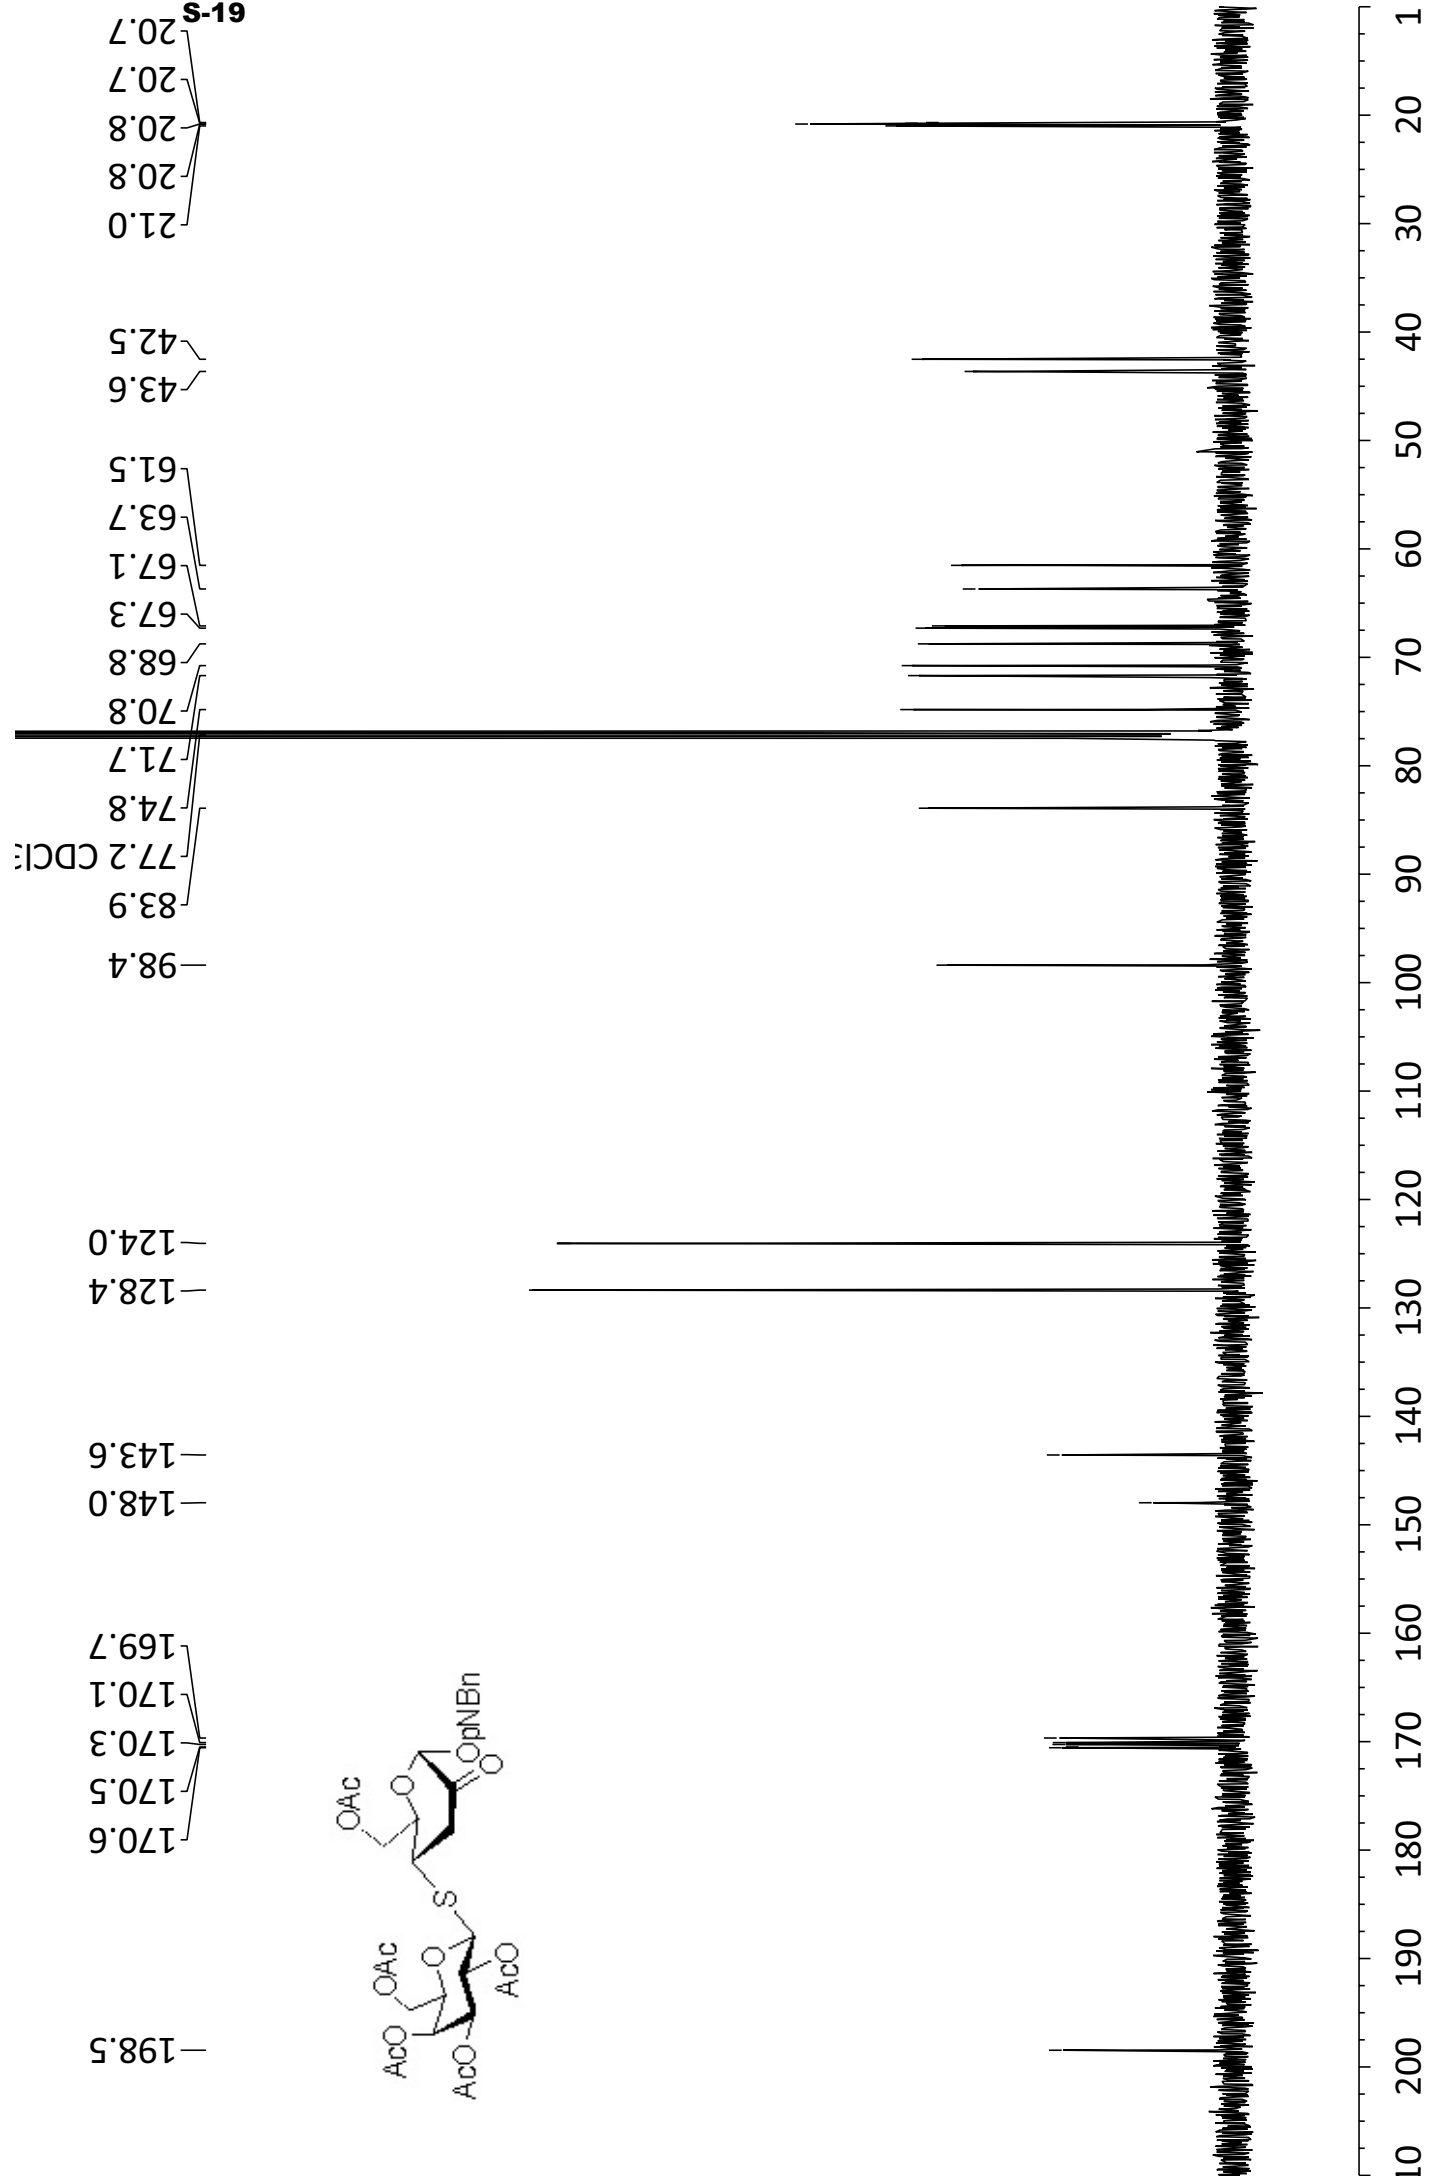

<sup>13</sup>C-NMR Spectrum of compound **12** (125.7 MHz, CDCl<sub>3</sub>).



<sup>13</sup>C-NMR Spectrum of compound **13** (125.7 MHz, CDCl<sub>3</sub>).

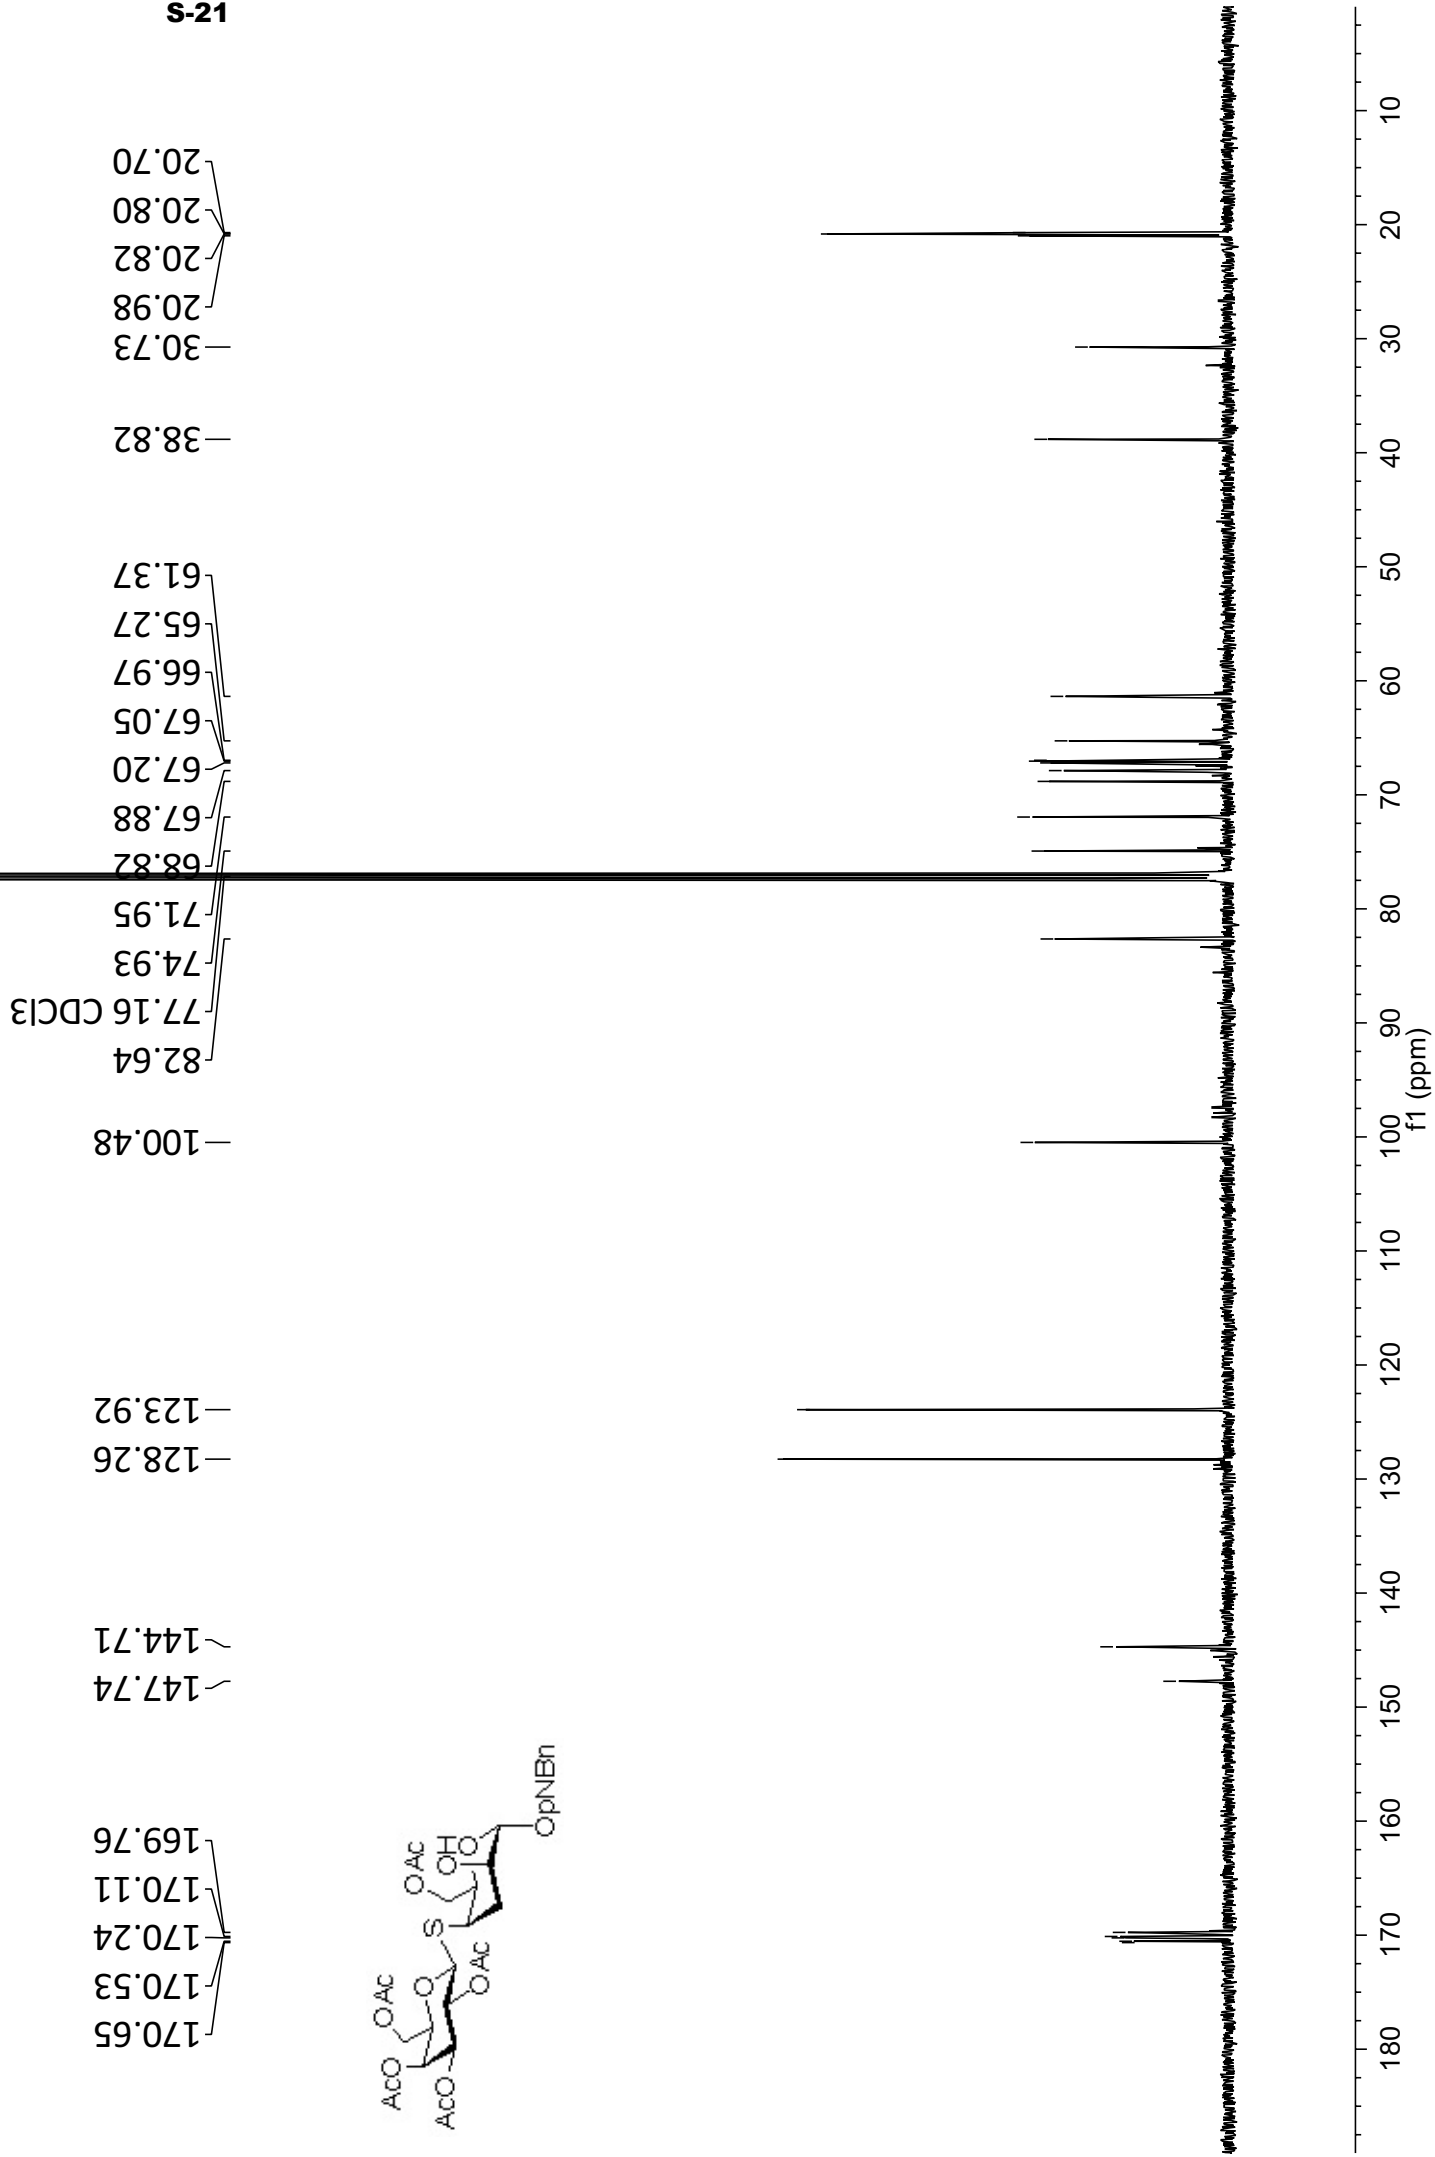

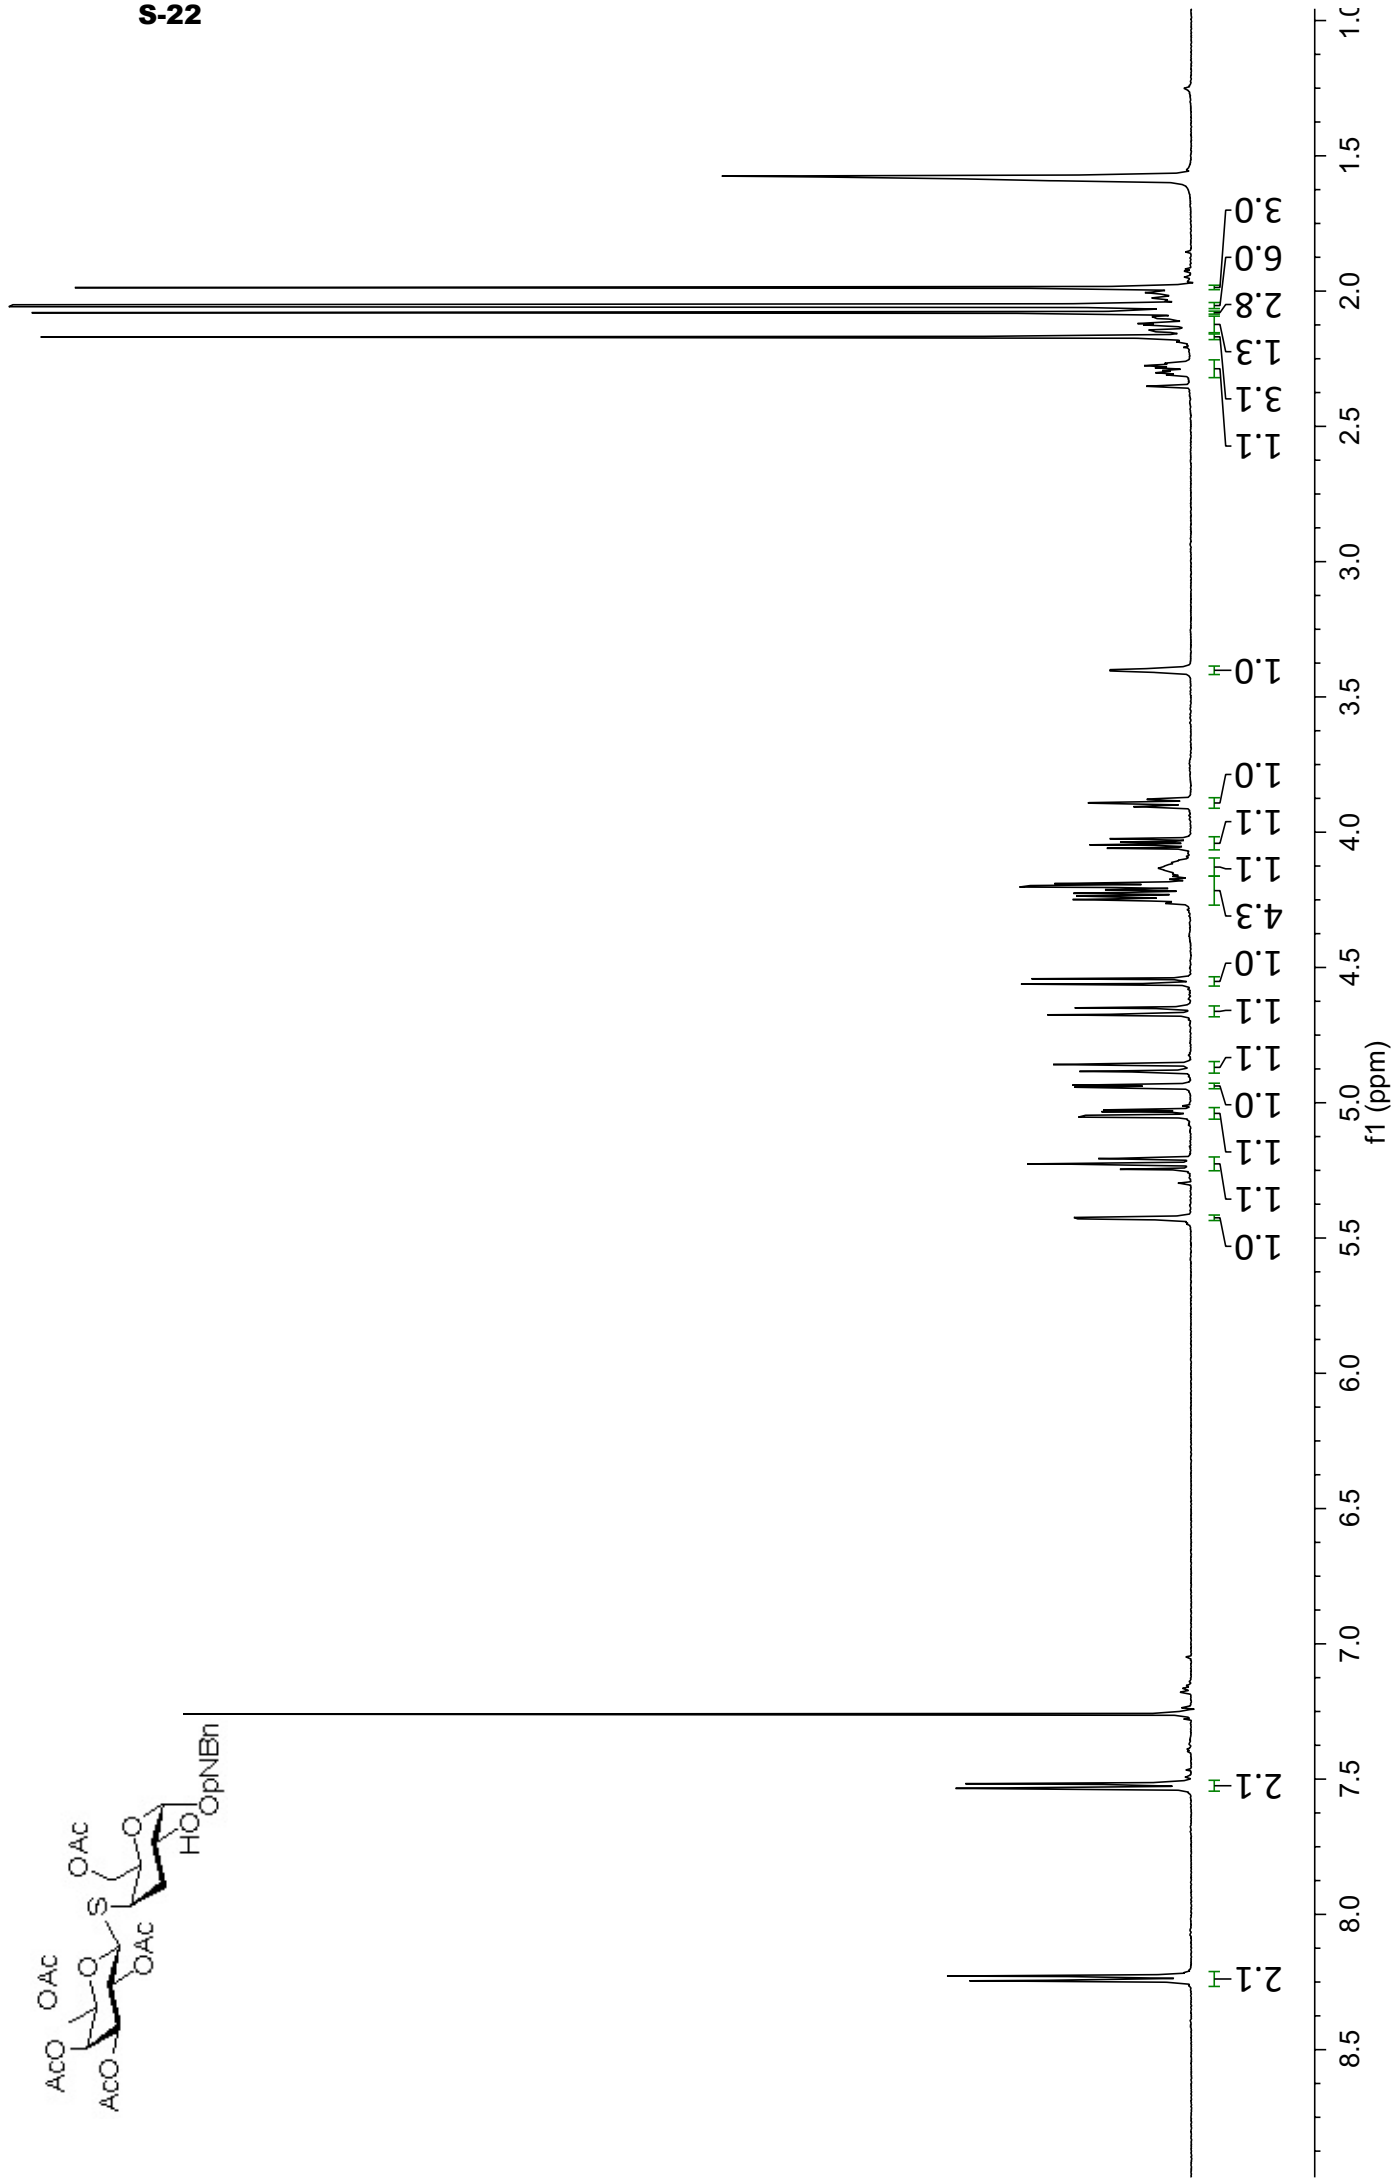

**<sup>1</sup>H-NMR** Spectrum of compound **14** (500 MHz, CDCl<sub>3</sub>).

**<sup>1</sup>H-NMR Spectrum of compound 14 (500 MHz, CDCl<sub>3</sub>).**

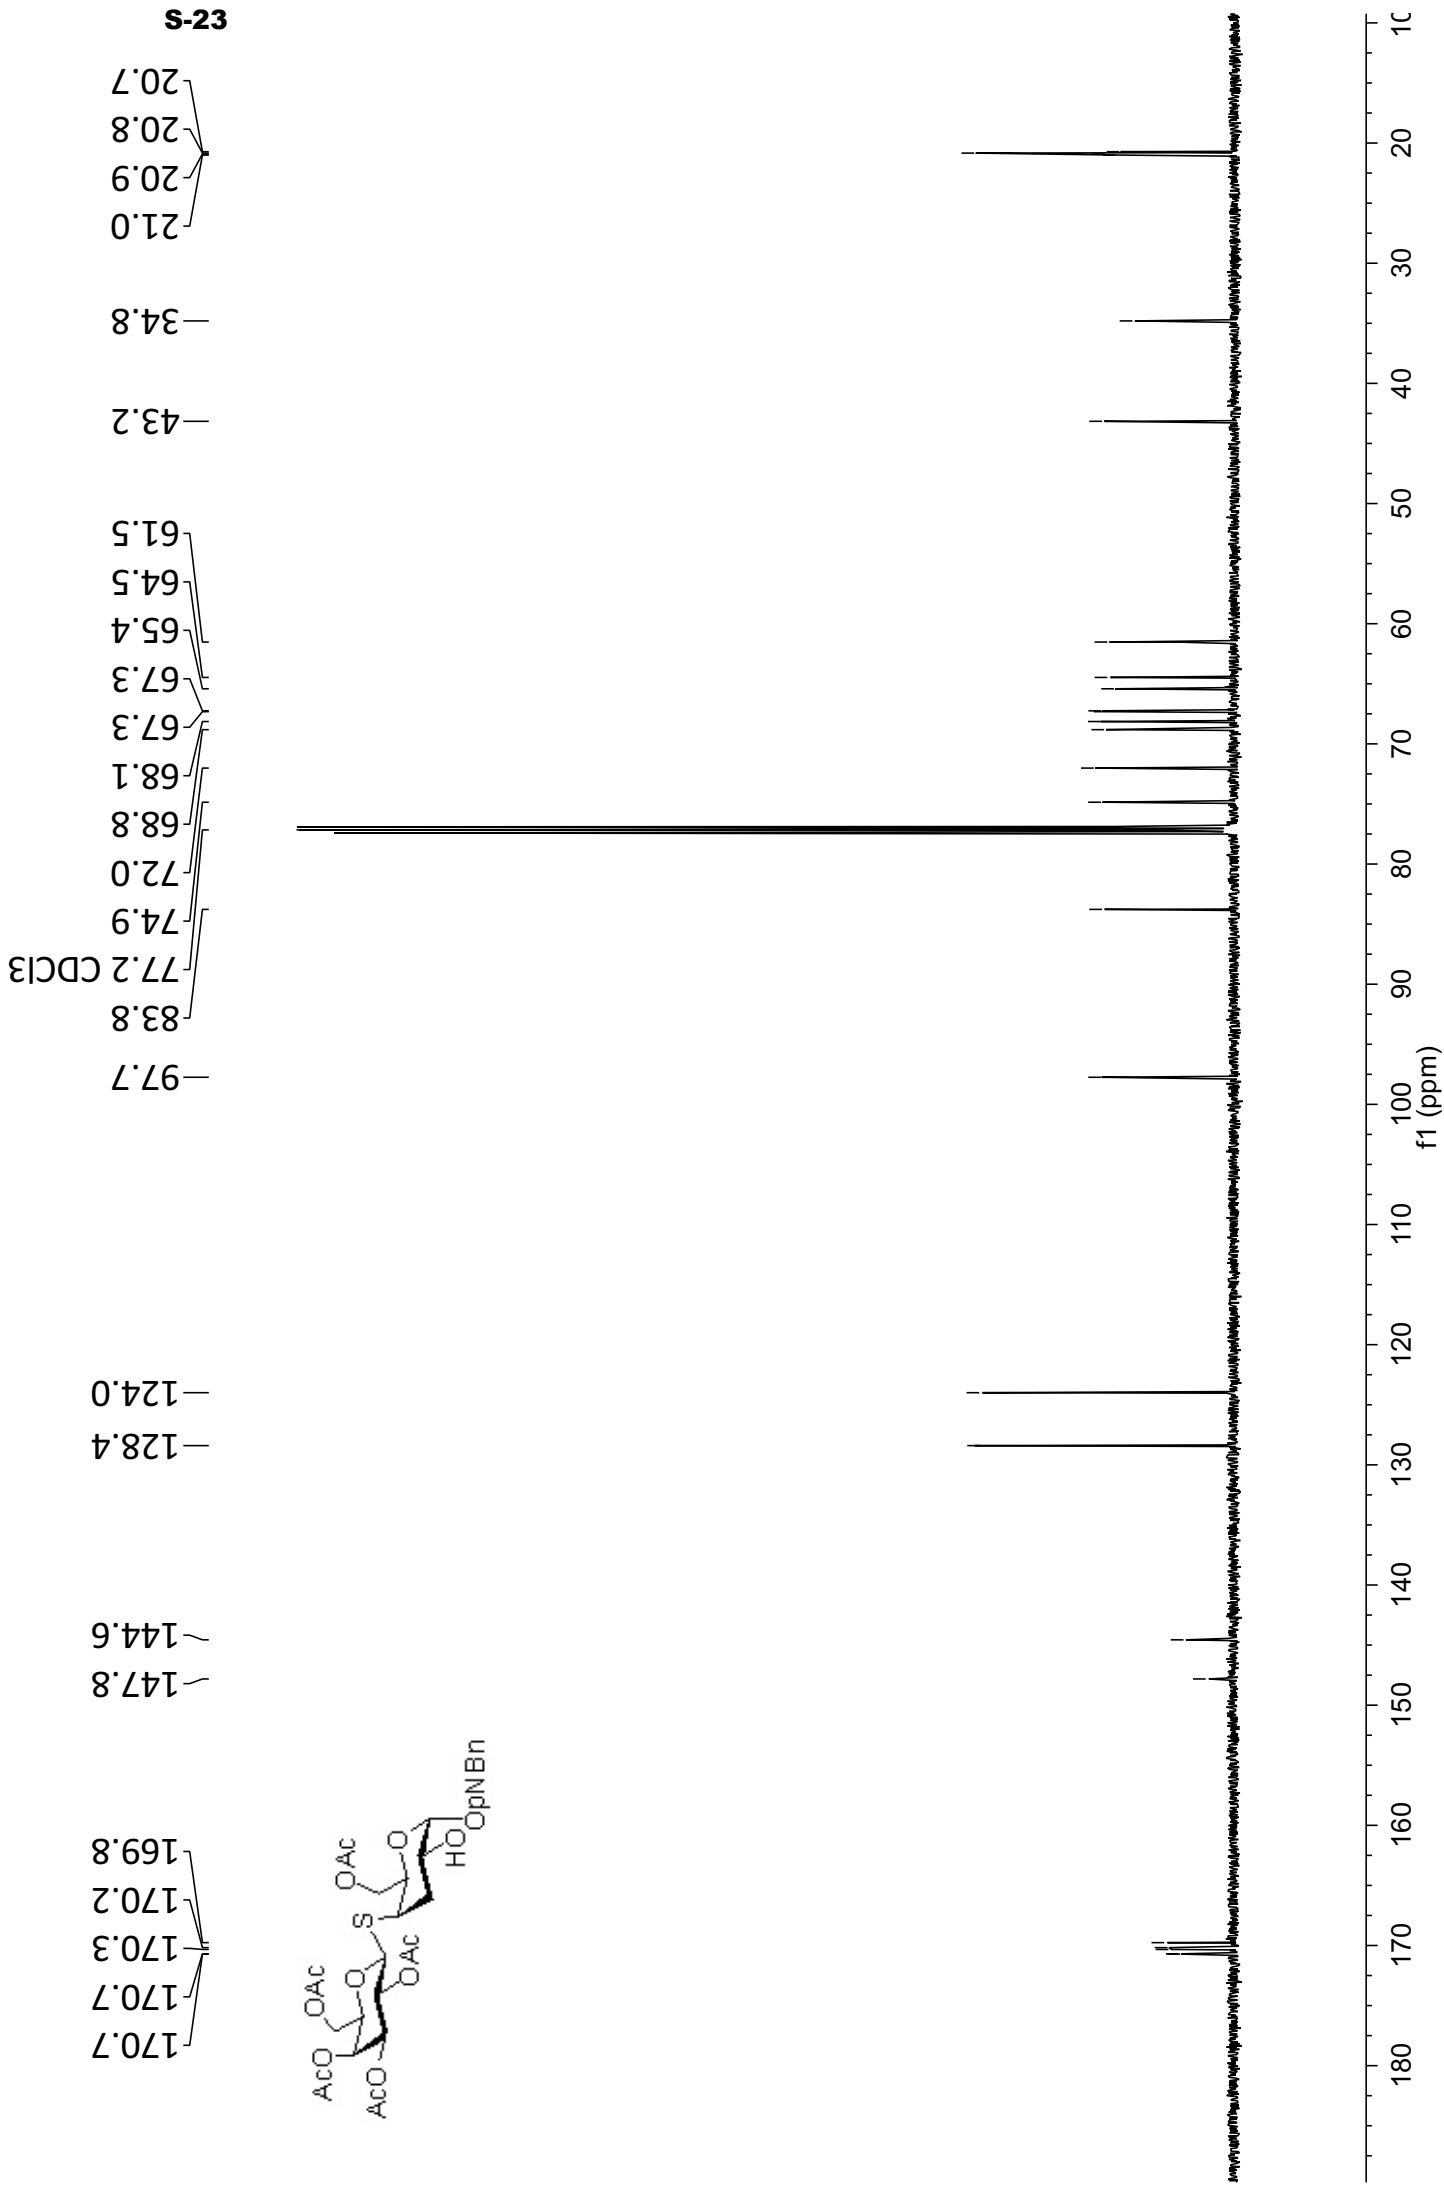





20.68  
 20.73  
 20.81  
 20.85  
 21.02  
 35.98  
 40.11  
 61.36  
 64.12  
 67.08  
 67.38  
 67.84  
 68.29  
 70.59  
 71.79  
 74.56  
 77.16 CDCl<sub>3</sub>  
 83.86  
 97.46

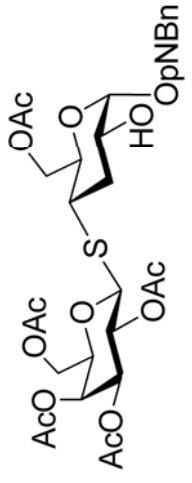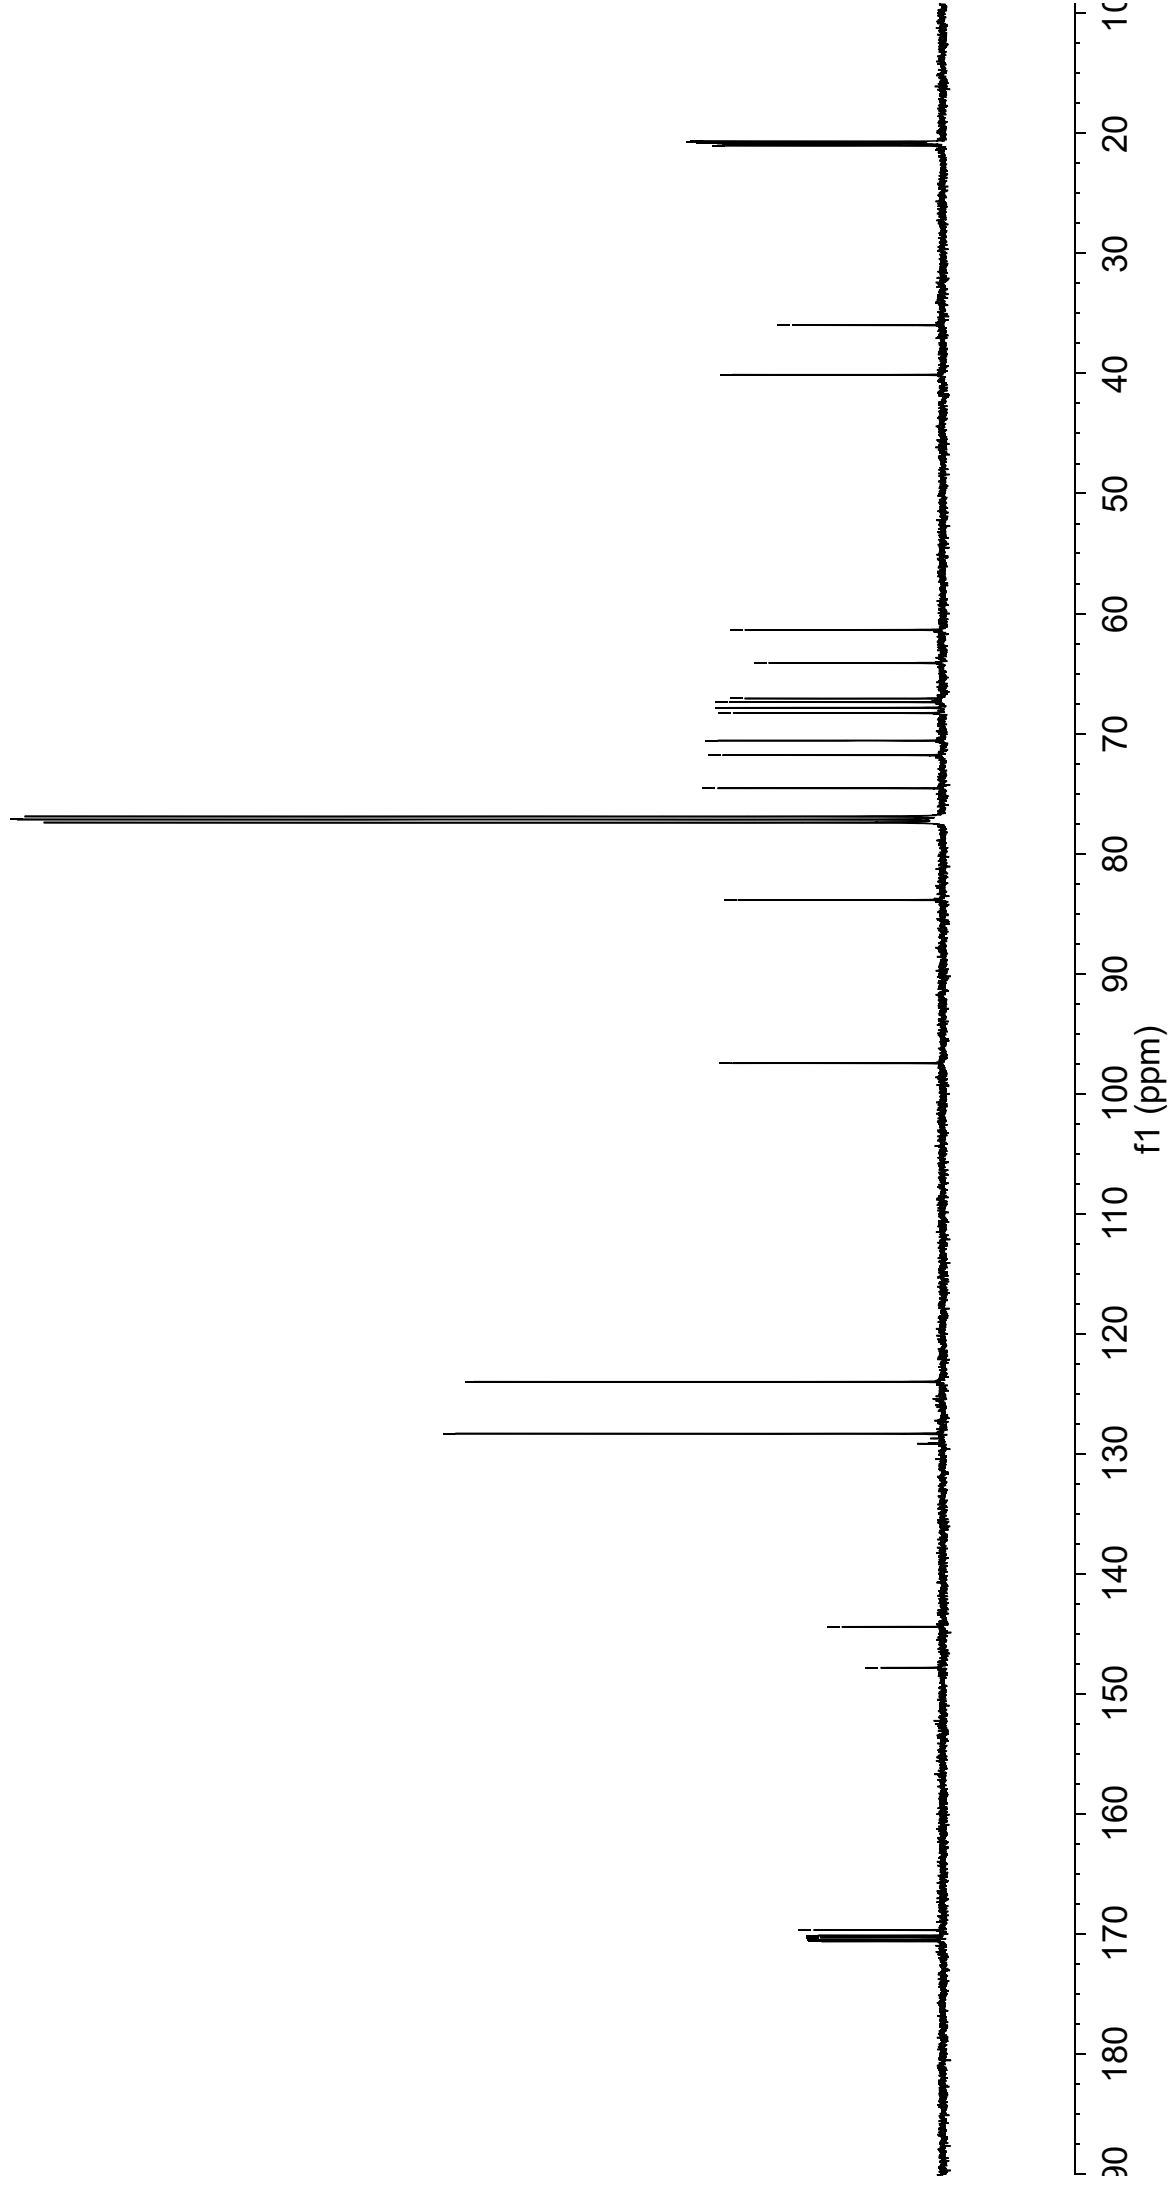

<sup>13</sup>C-NMR Spectrum of compound **15** (125.7 MHz, CDCl<sub>3</sub>).

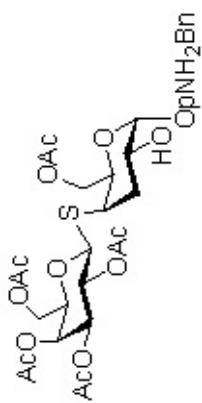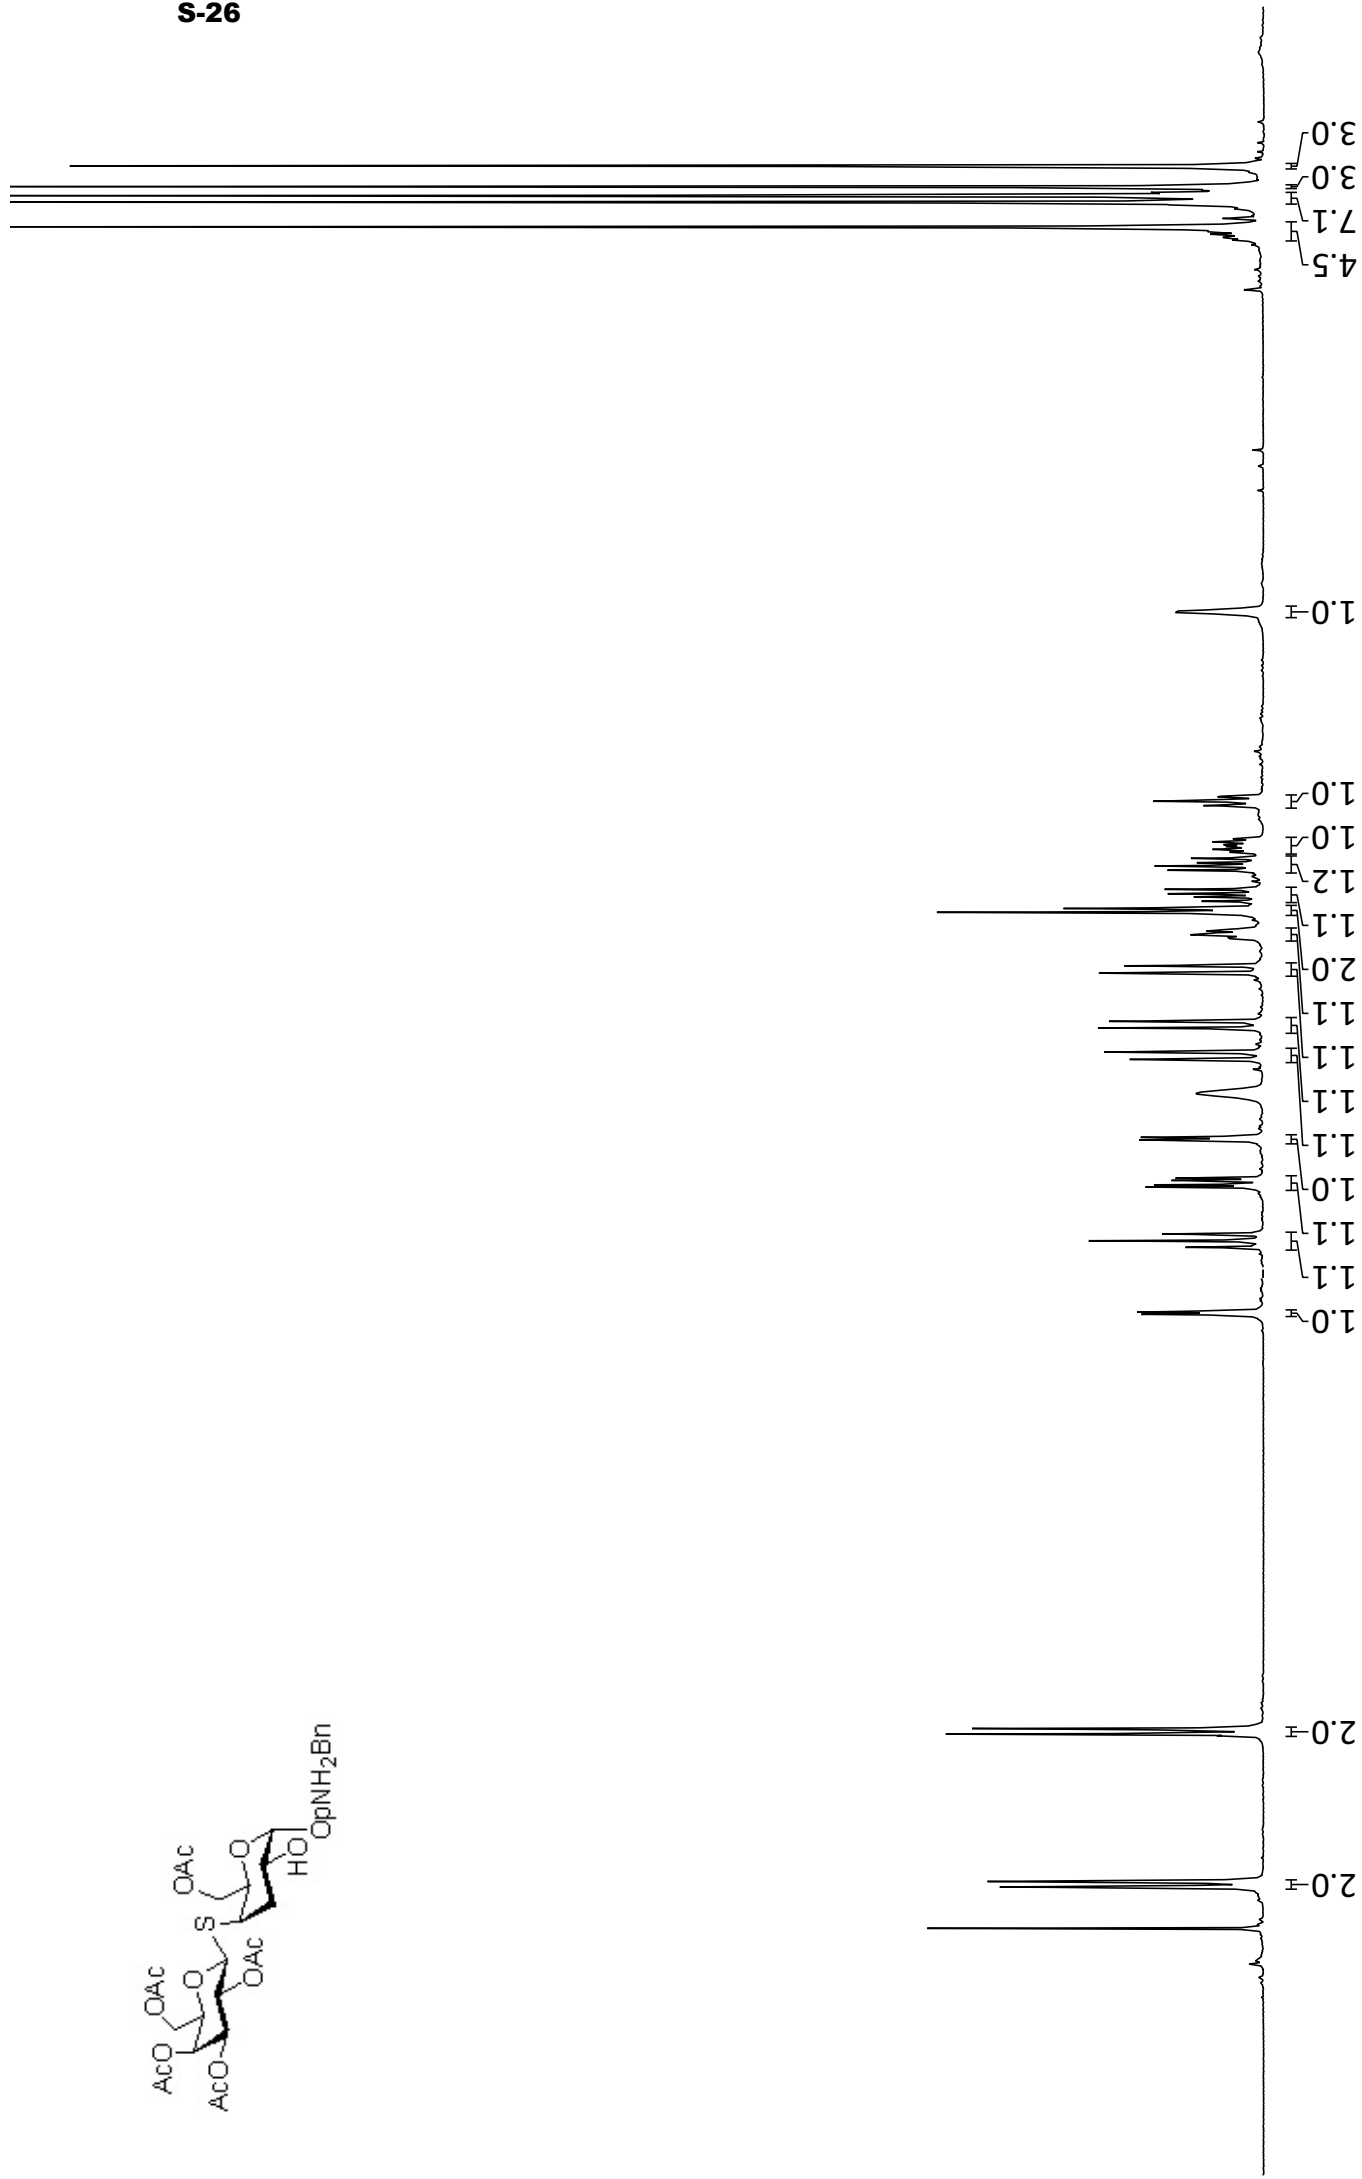

<sup>1</sup>H-NMR Spectrum of compound 16 (500 MHz, CDCl<sub>3</sub>).

<sup>13</sup>C-NMR Spectrum of compound **16** (125.7 MHz, CDCl<sub>3</sub>).

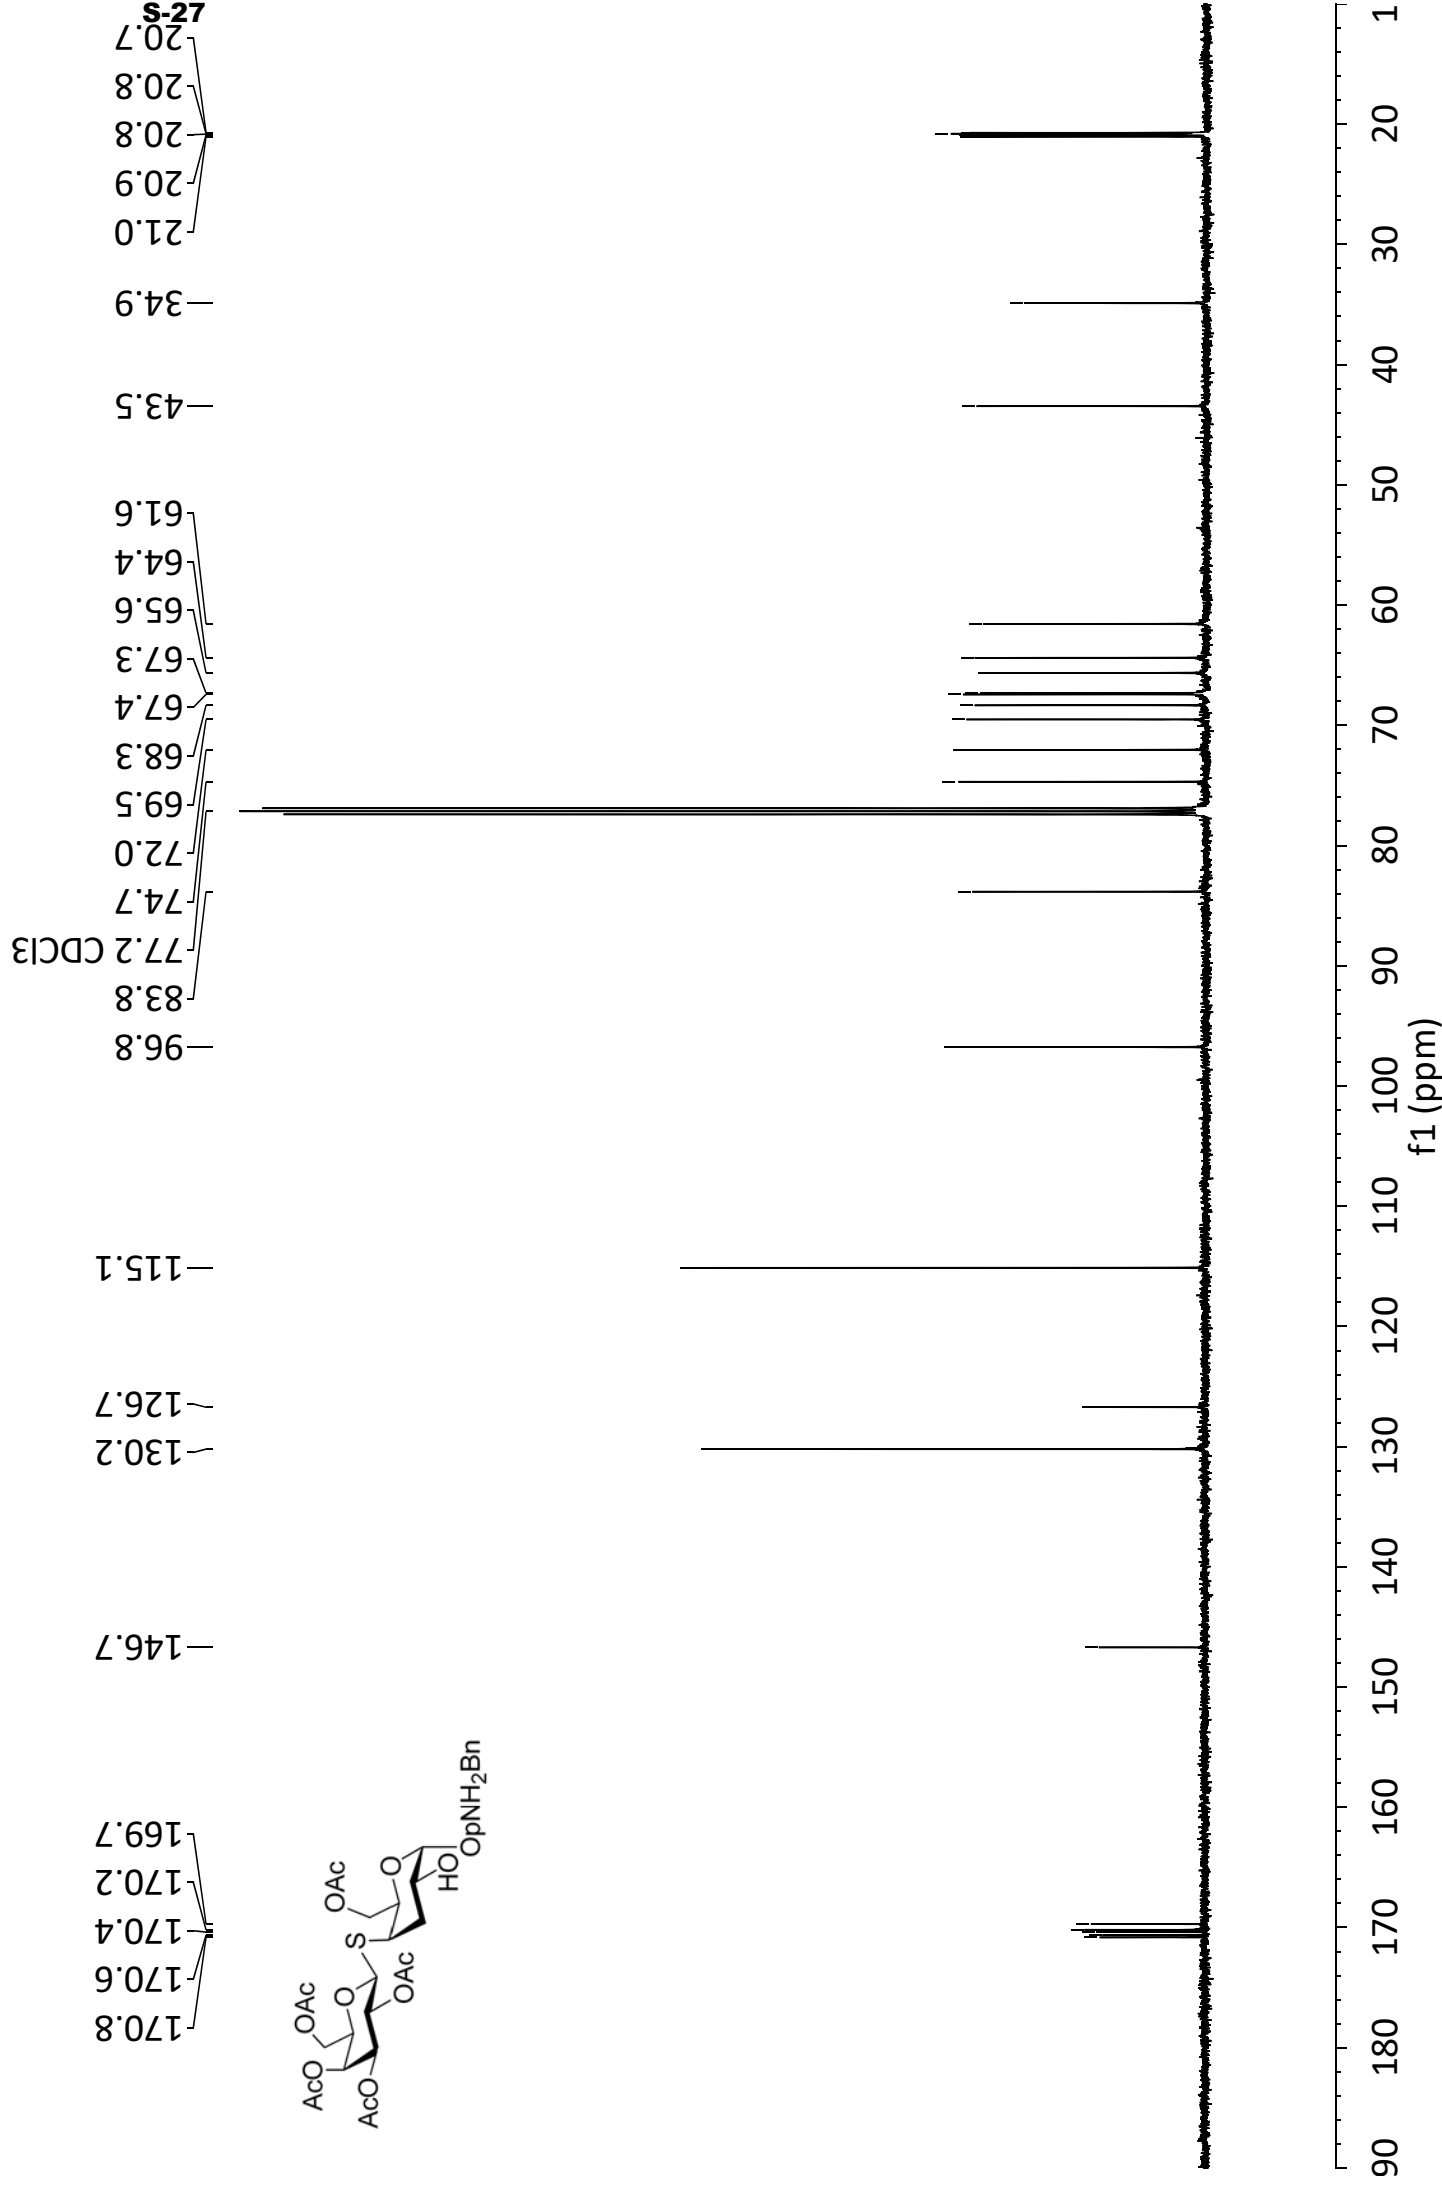

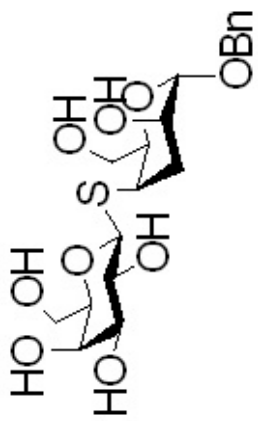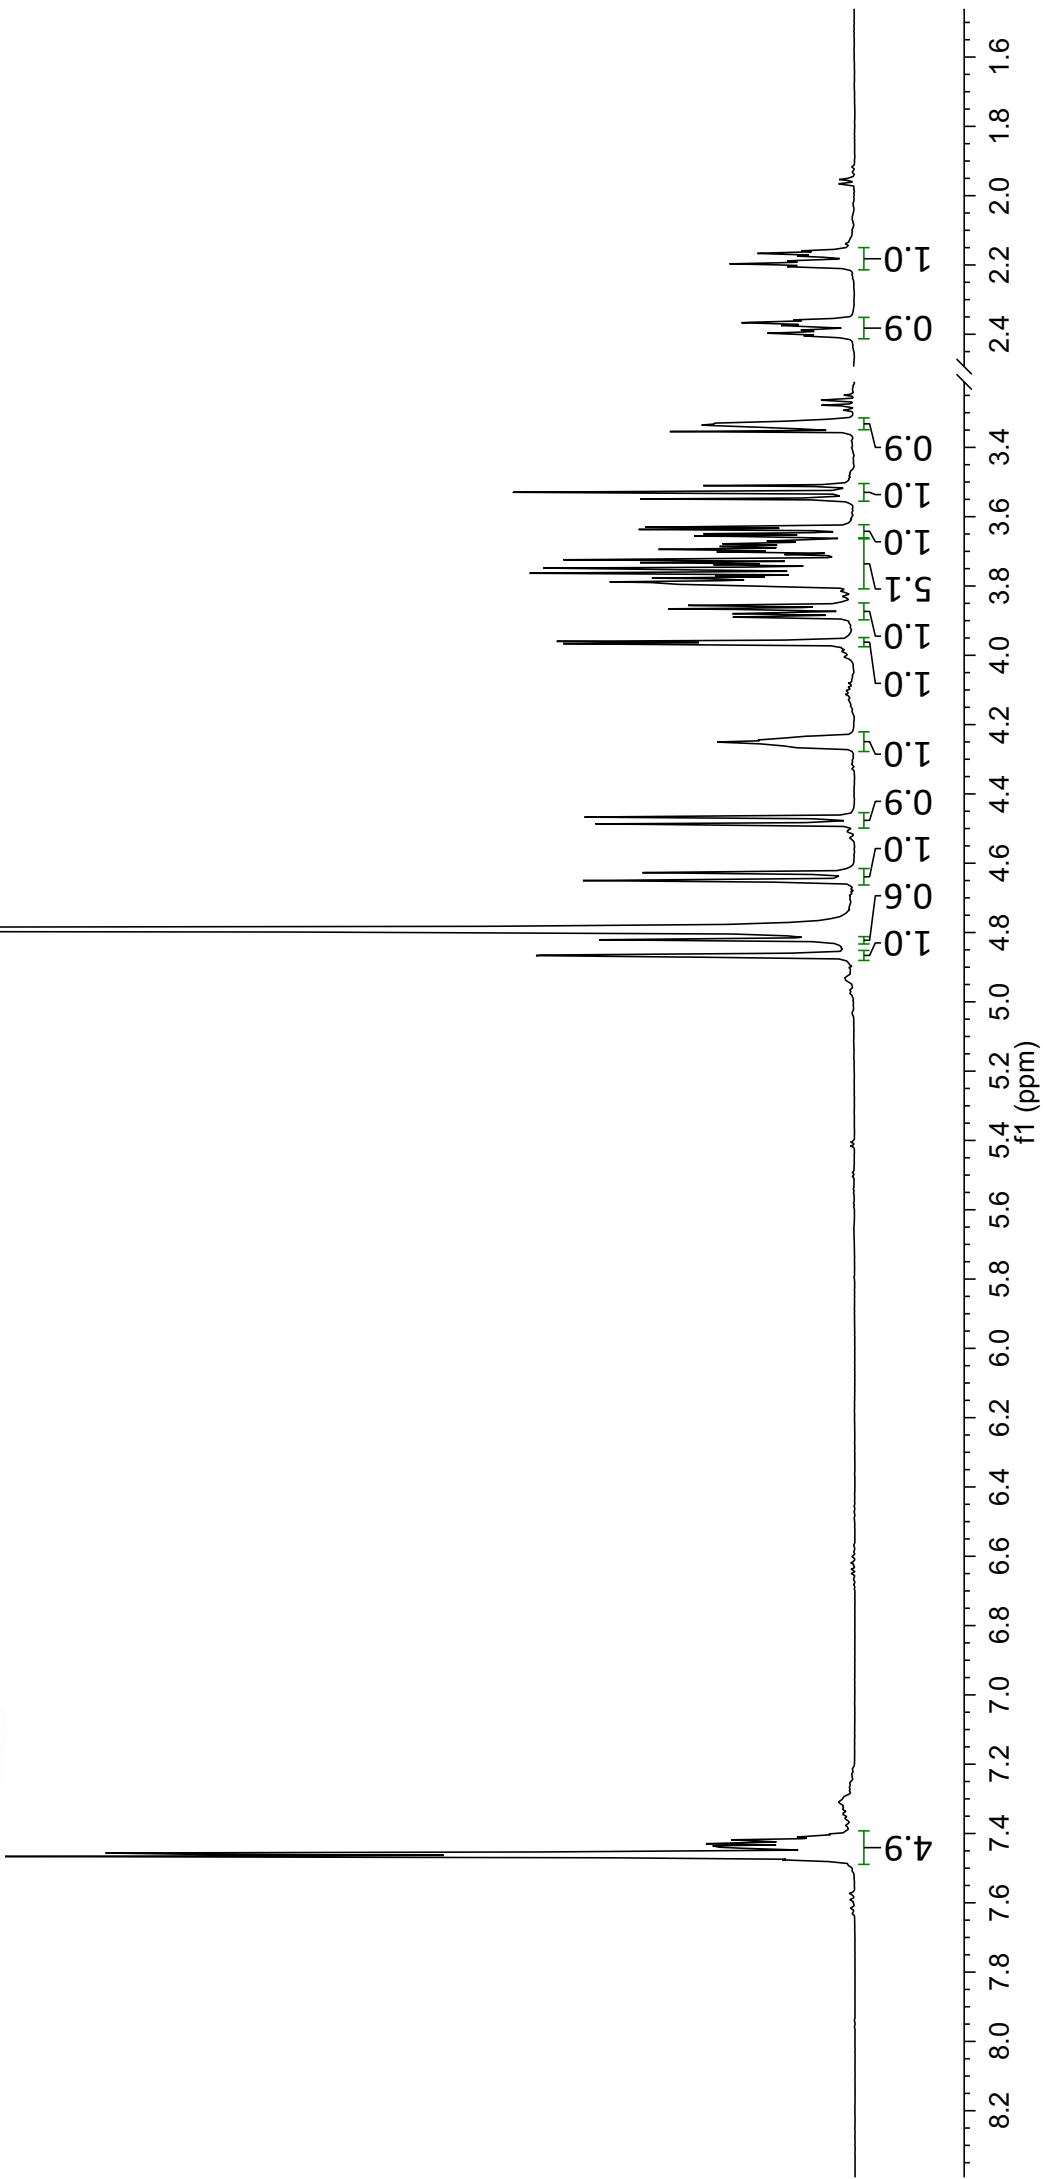

$^1\text{H-NMR}$  Spectrum of compound **17** (500 MHz,  $\text{CDCl}_3$ ).

**<sup>13</sup>C-NMR Spectrum of compound 17 (125.7 MHz, CDCl<sub>3</sub>).**

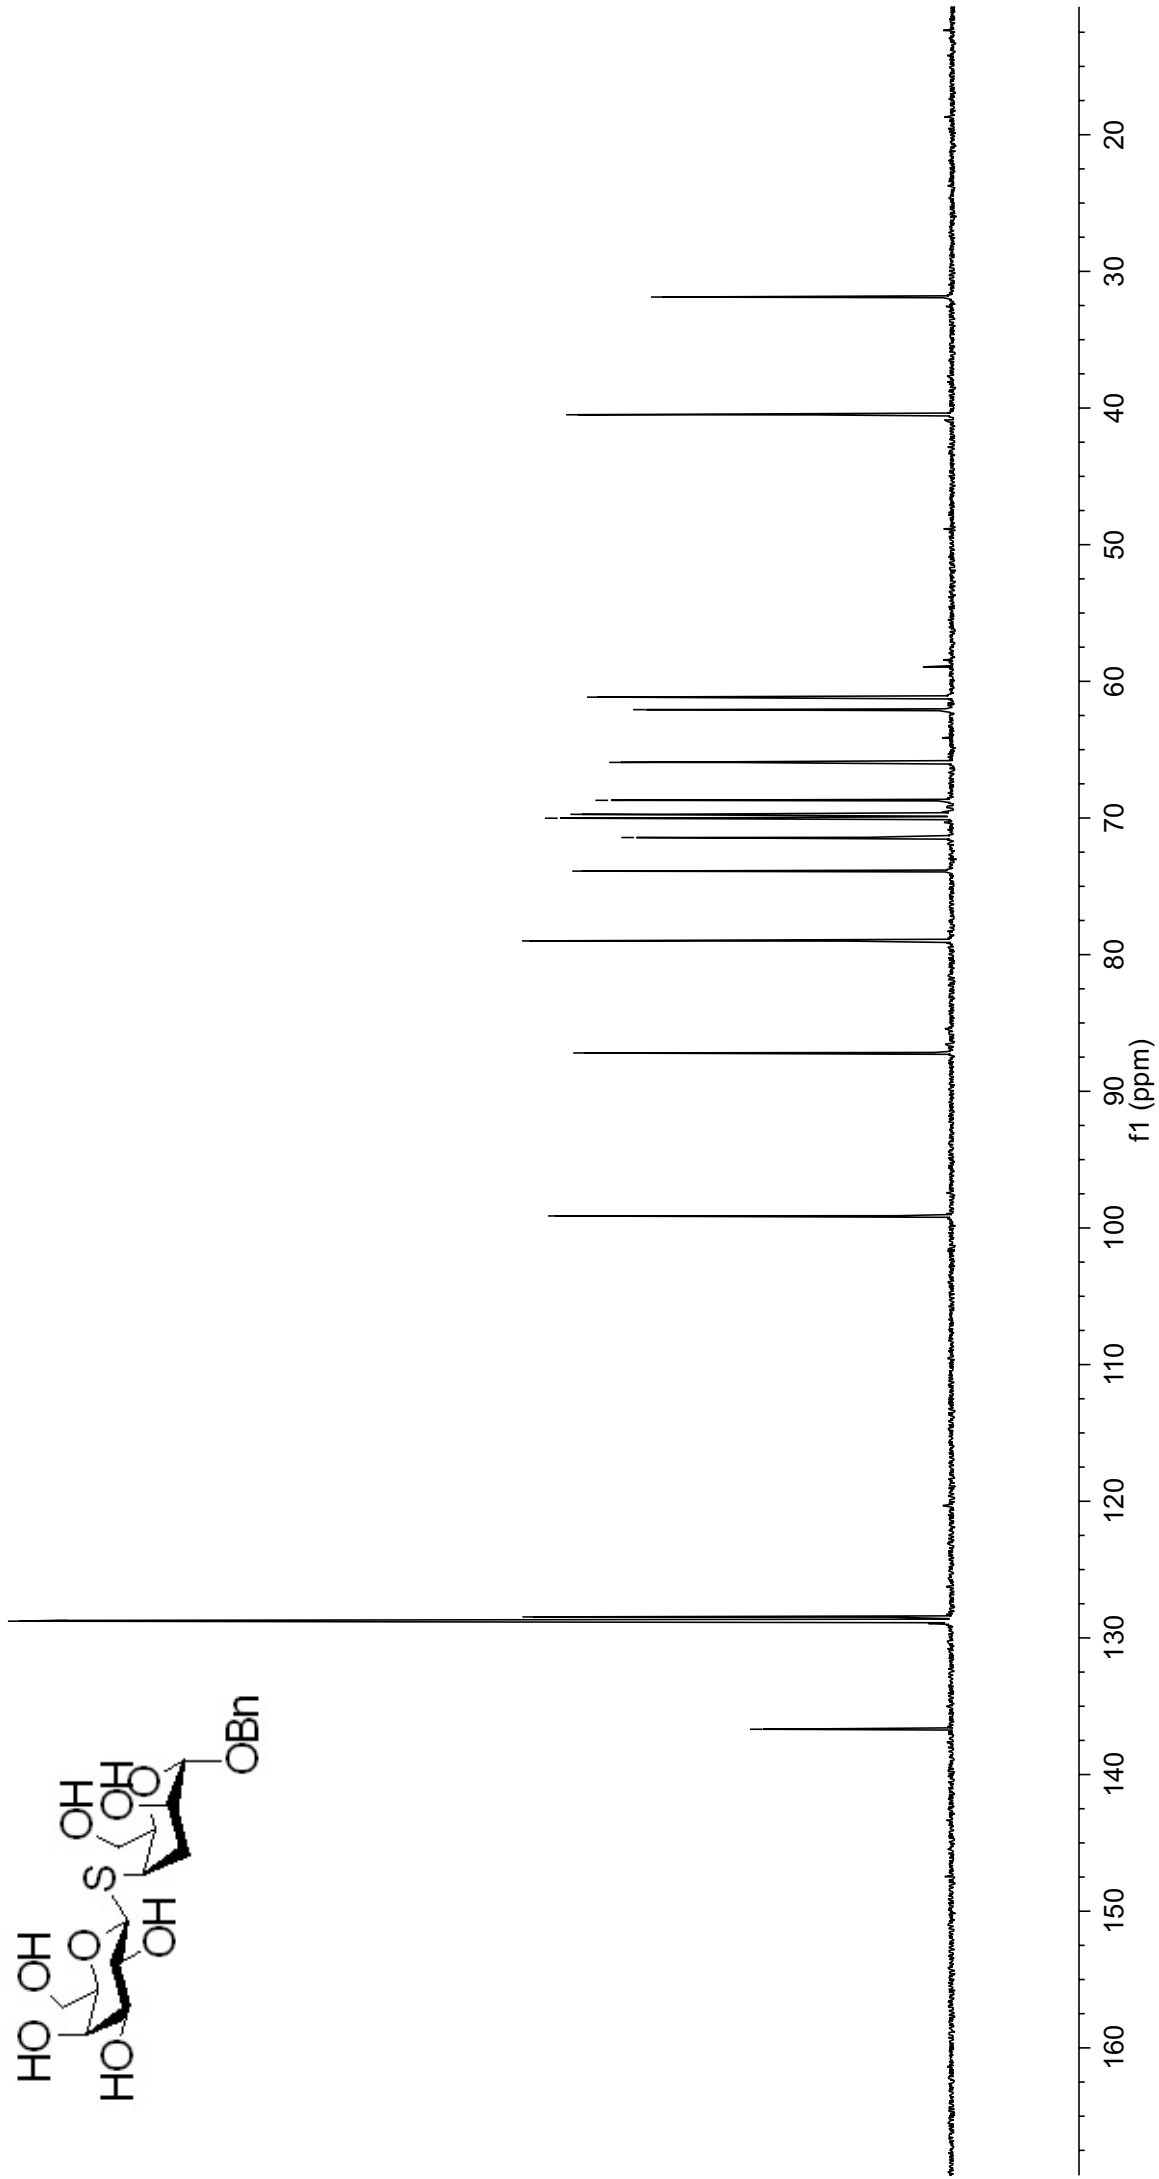

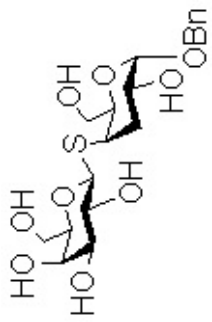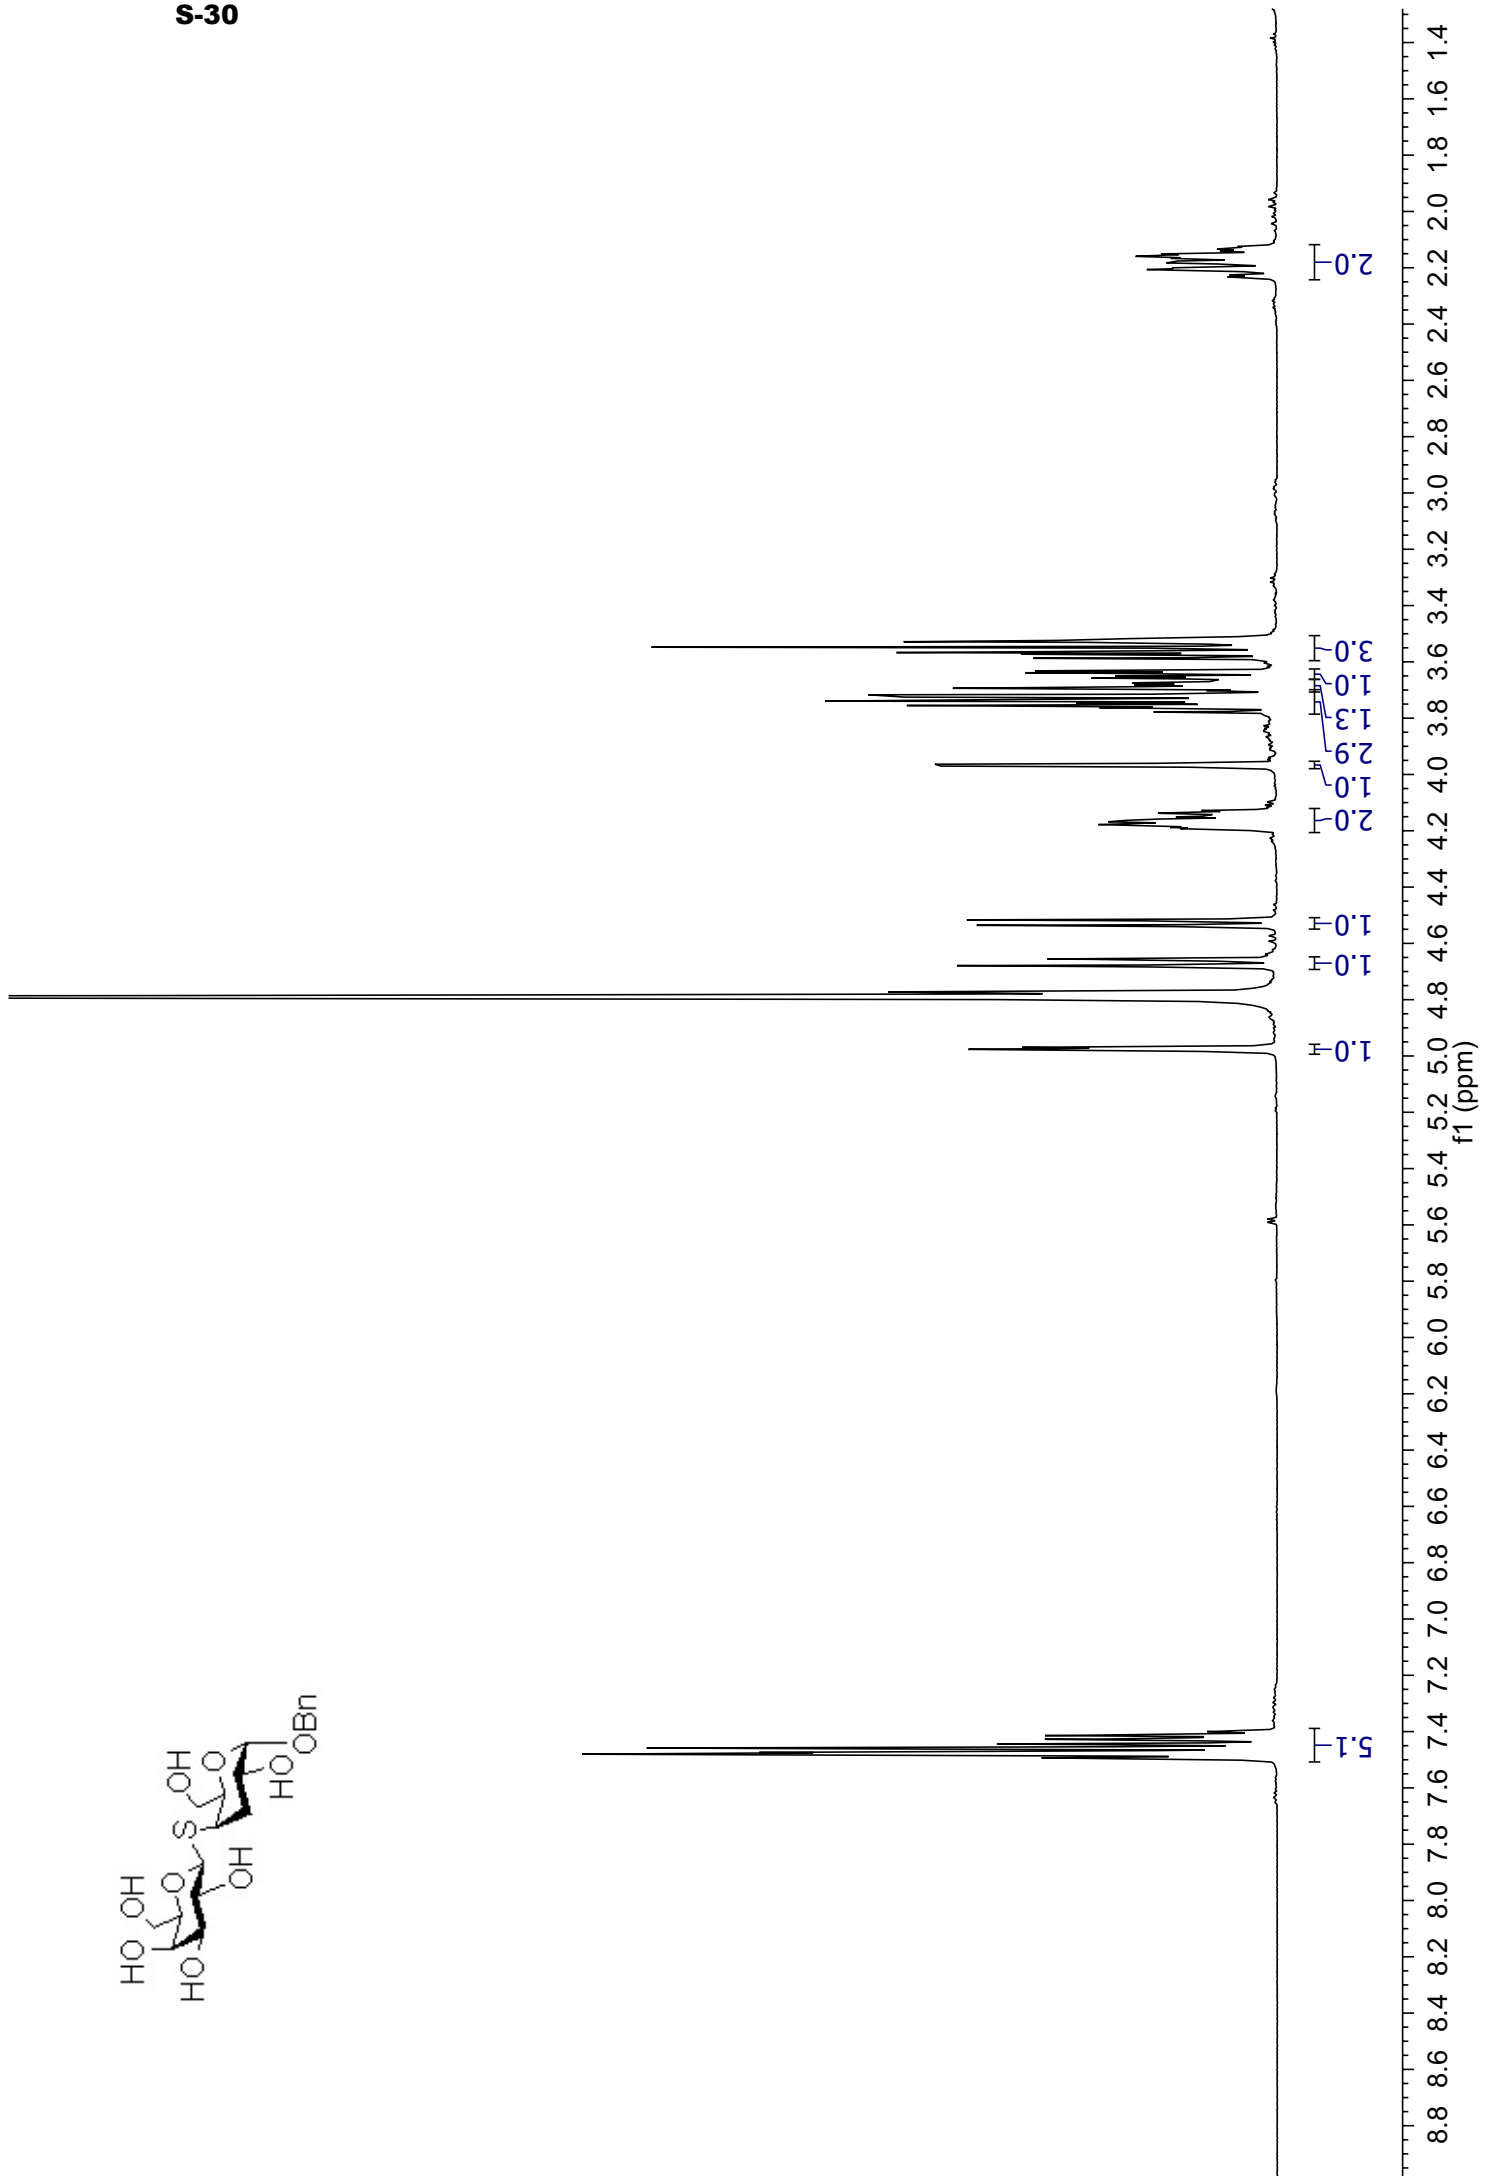

$^1\text{H-NMR}$  Spectrum of compound **18** (500 MHz,  $\text{CDCl}_3$ ).

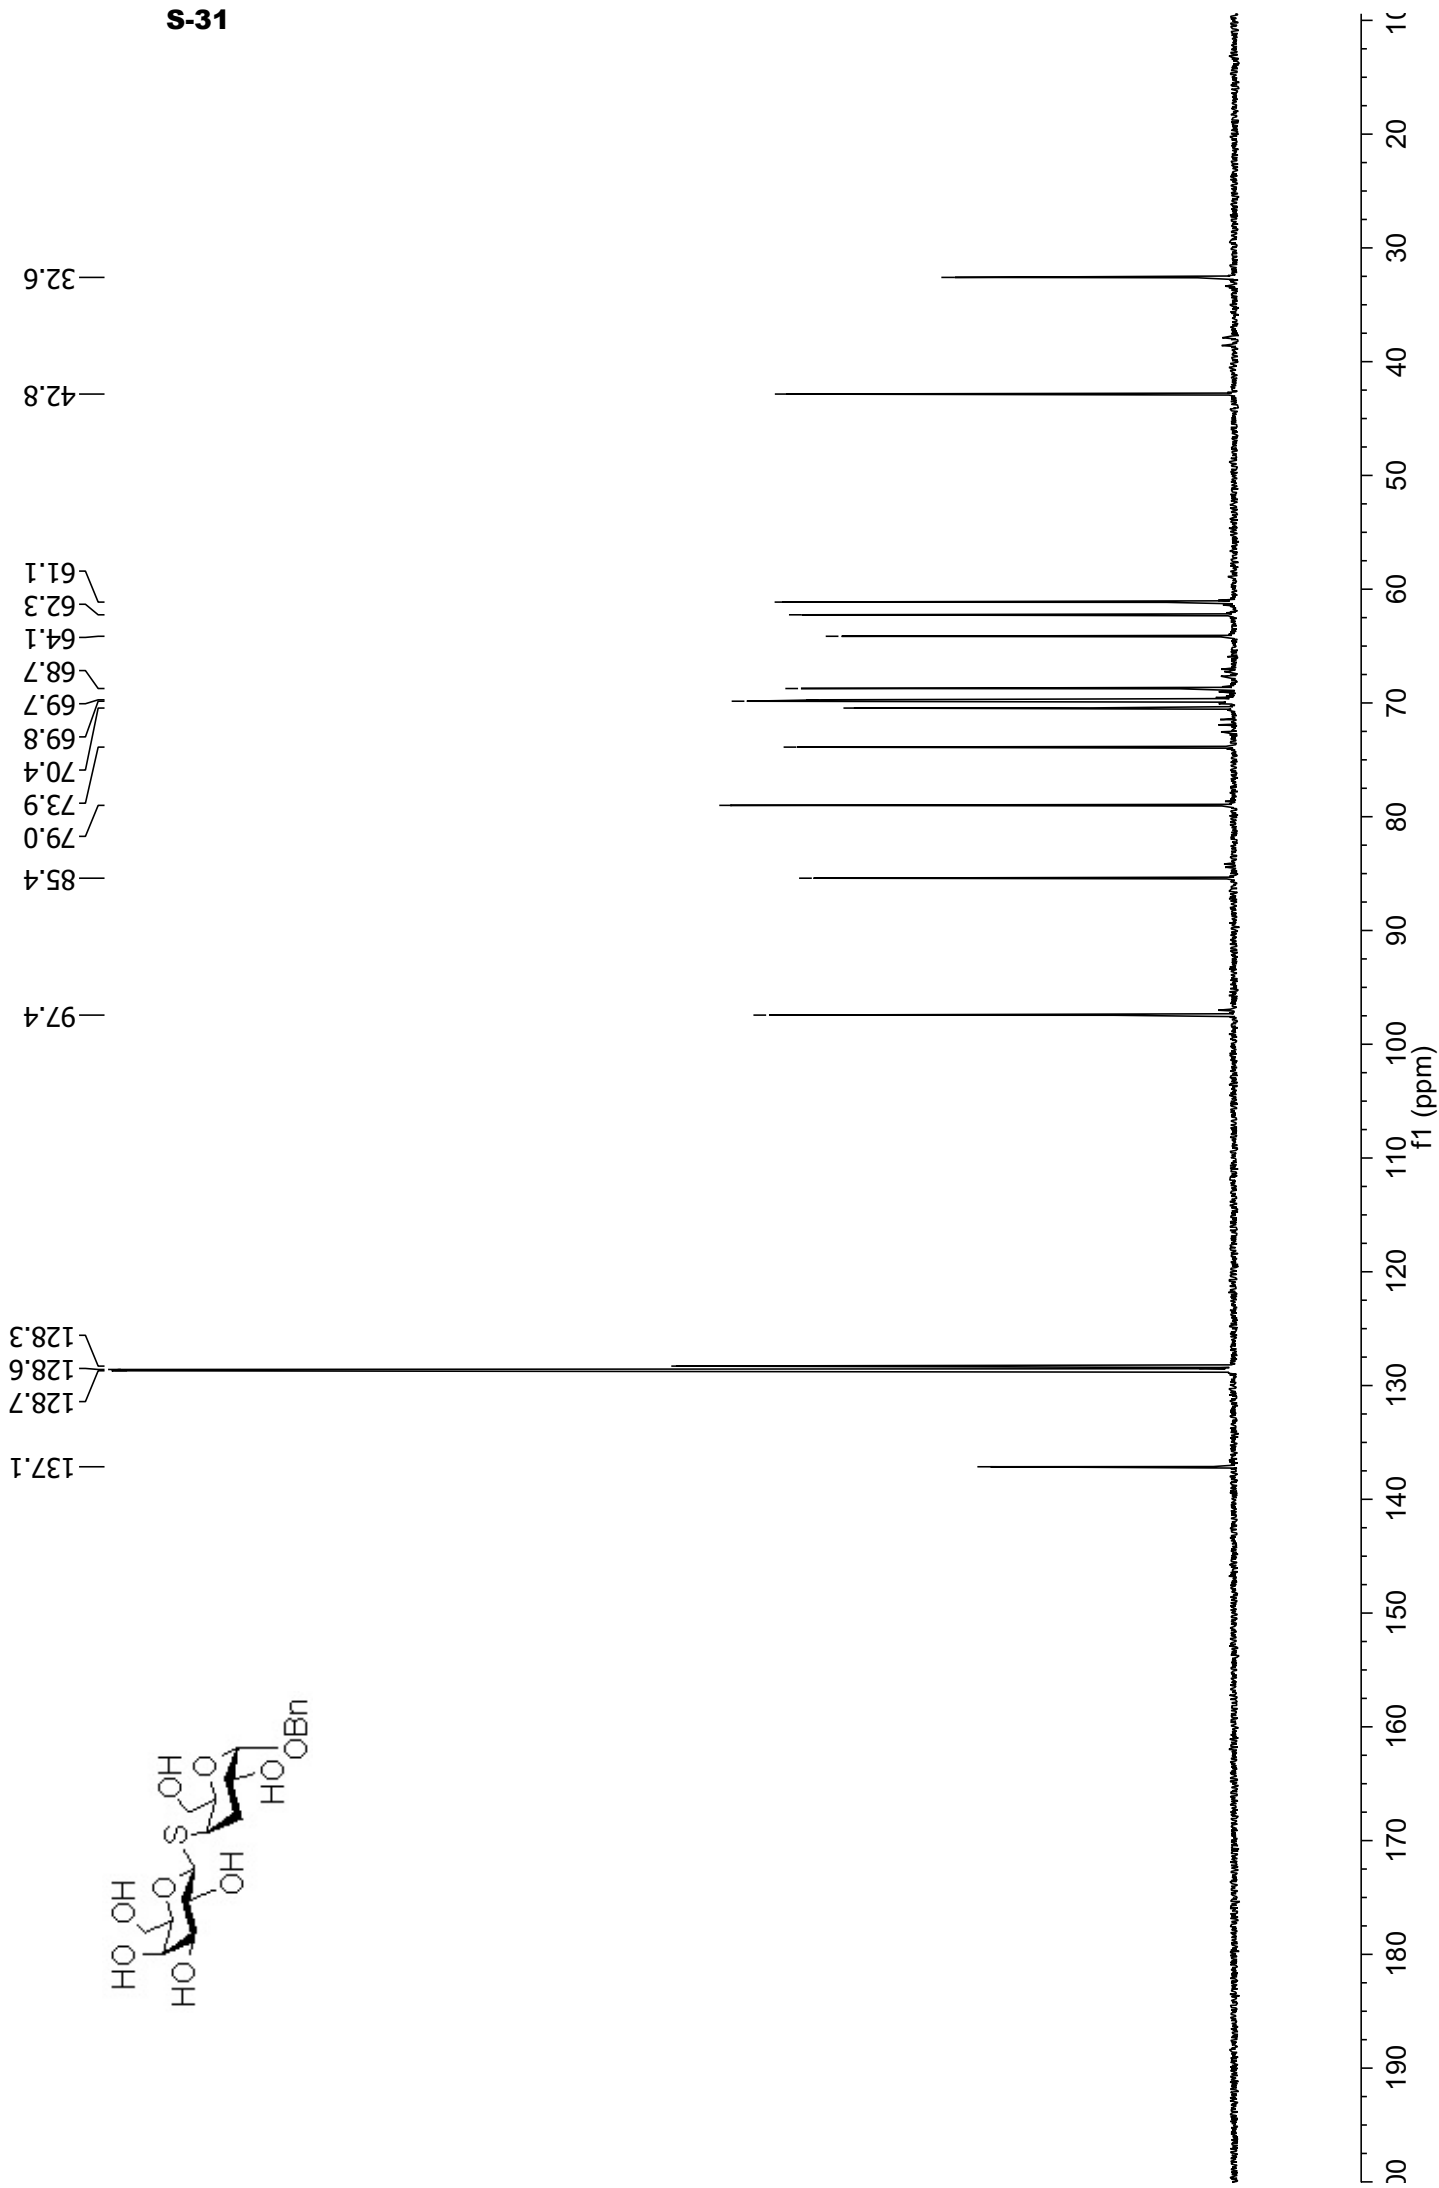

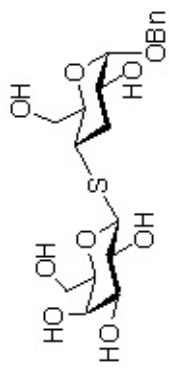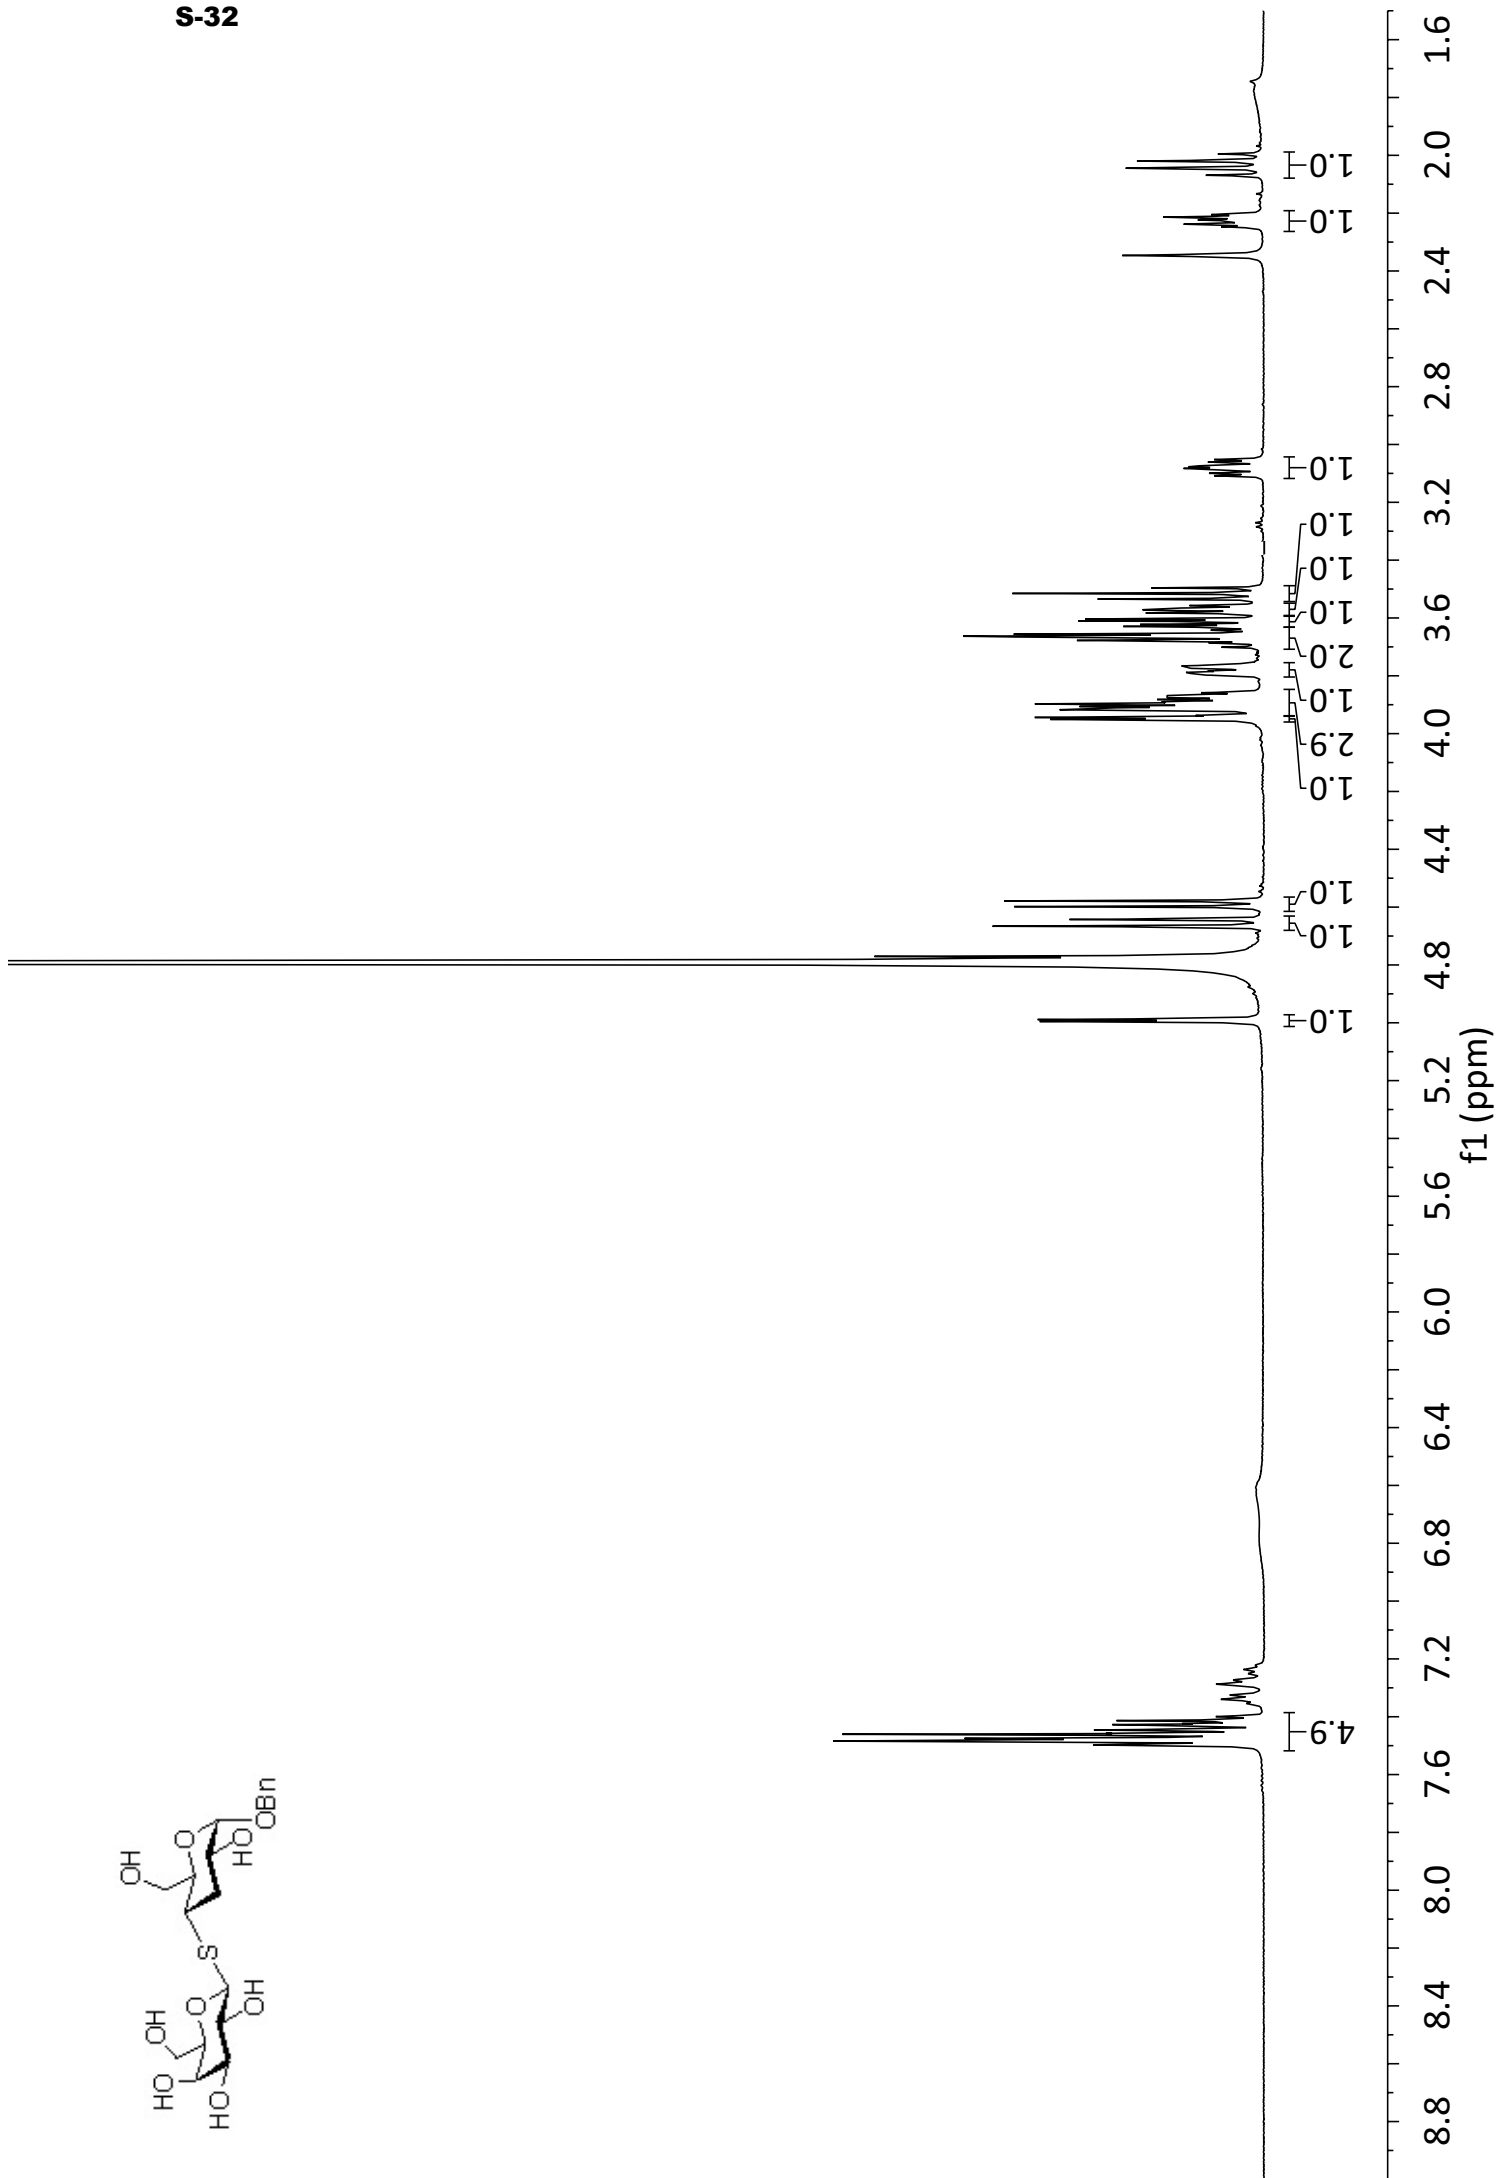

<sup>1</sup>H-NMR Spectrum of compound 19 (500 MHz, CDCl<sub>3</sub>).



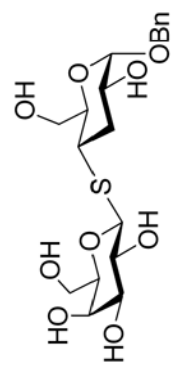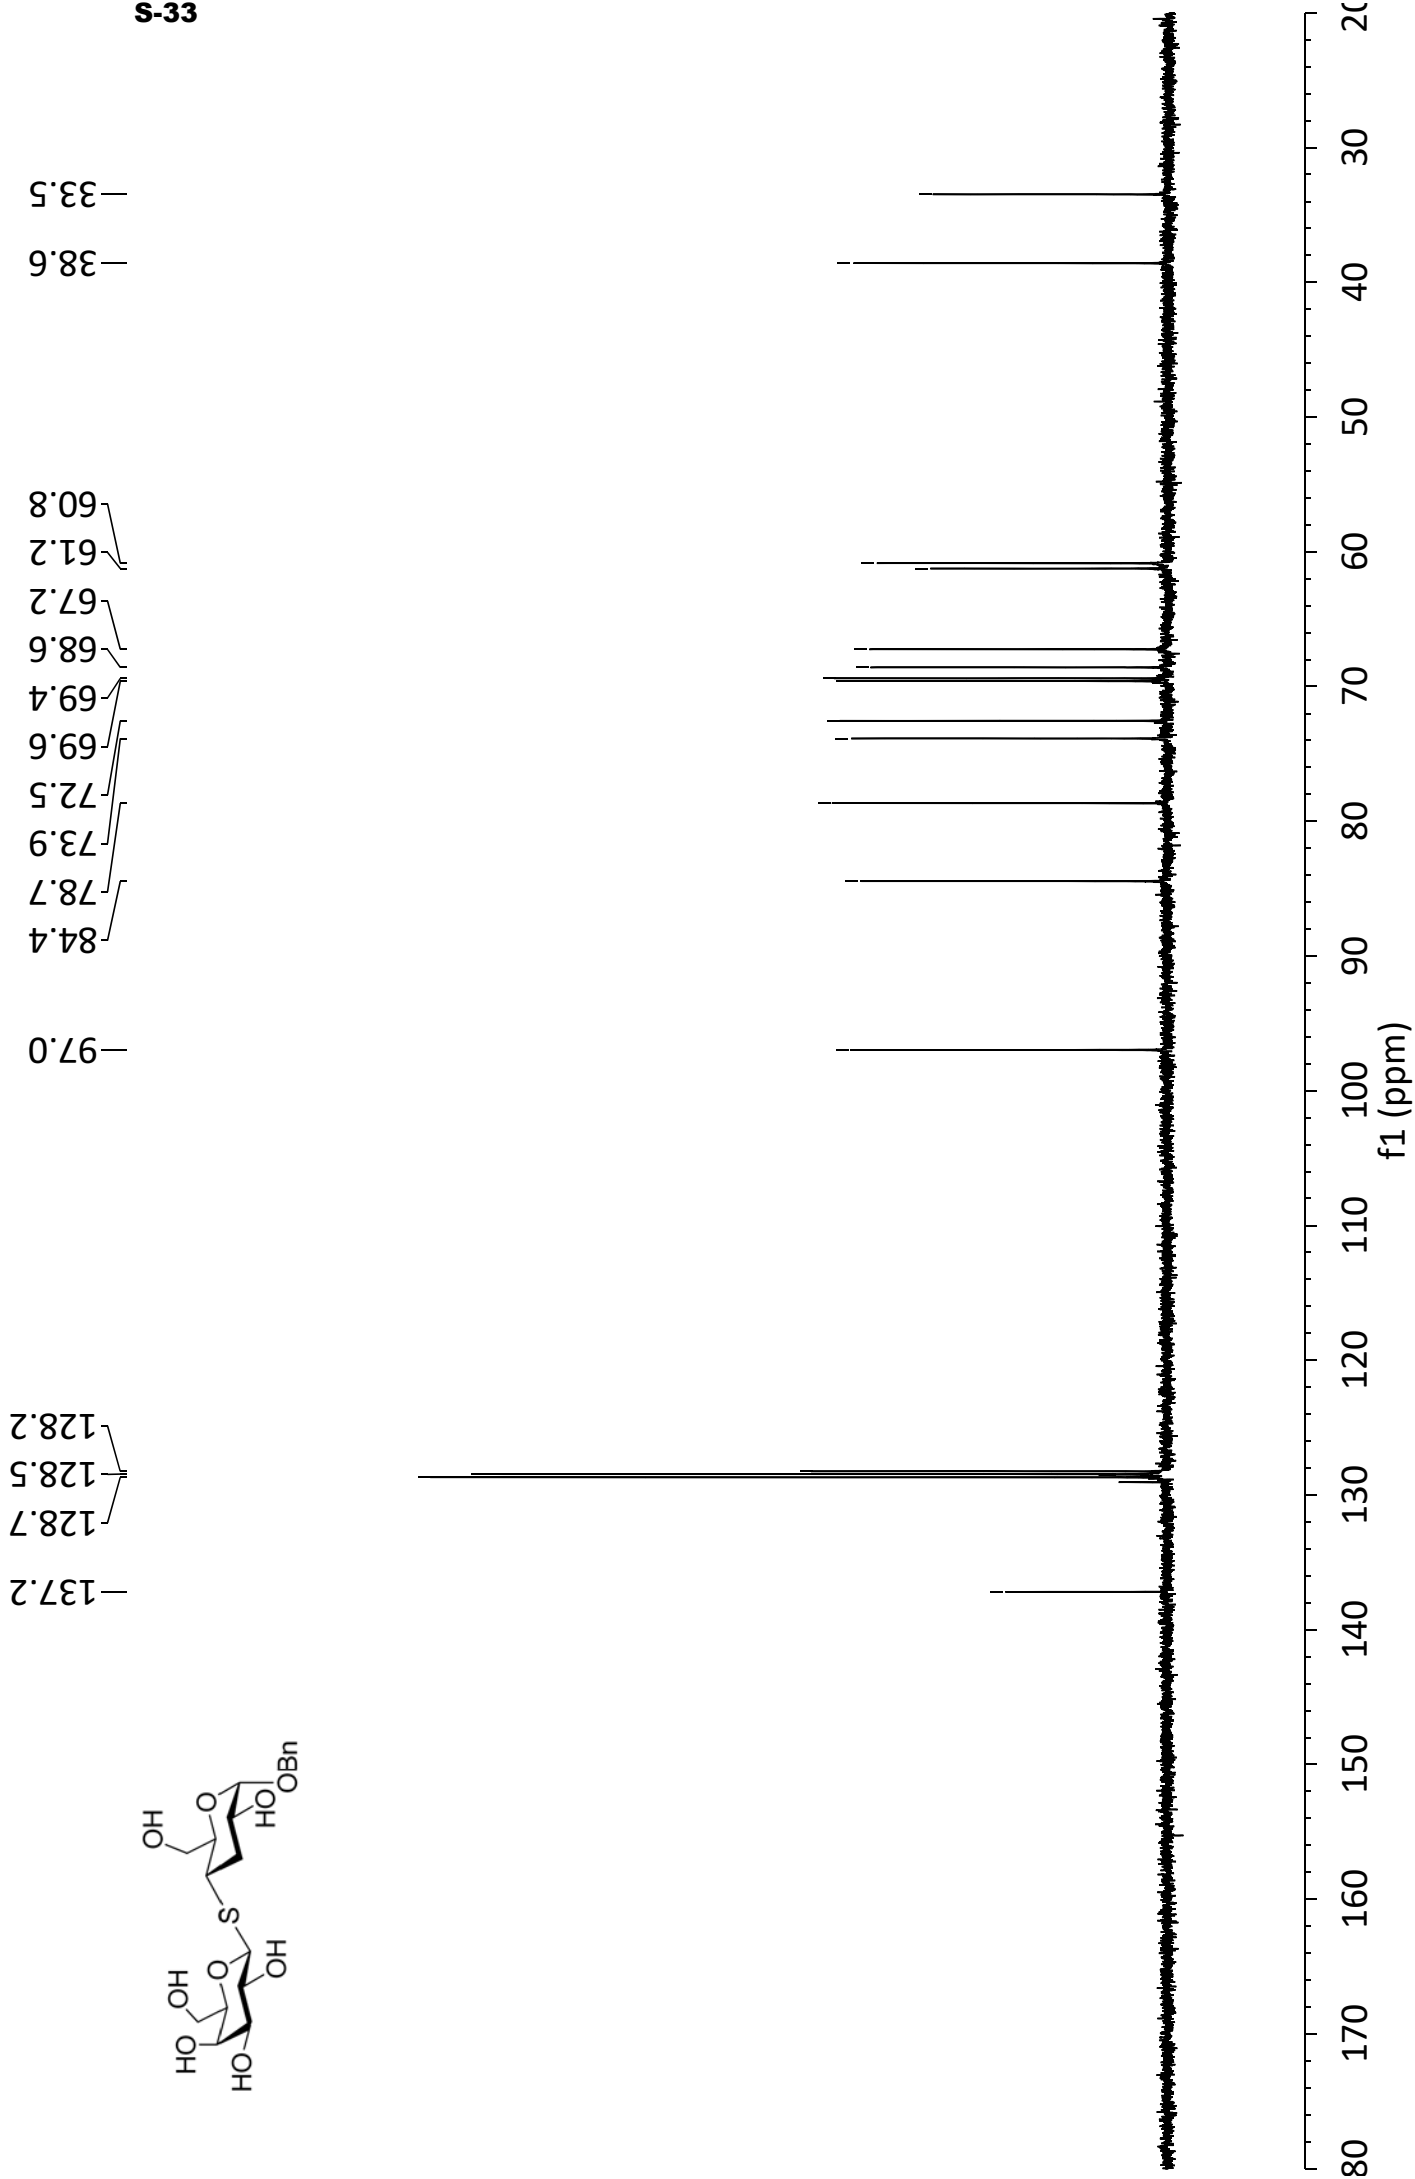

<sup>13</sup>C-NMR Spectrum of compound 19 (125.7 MHz, CDCl<sub>3</sub>).

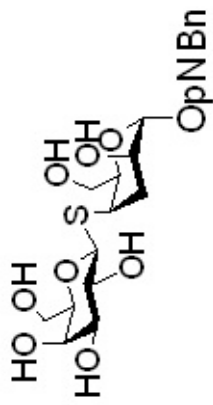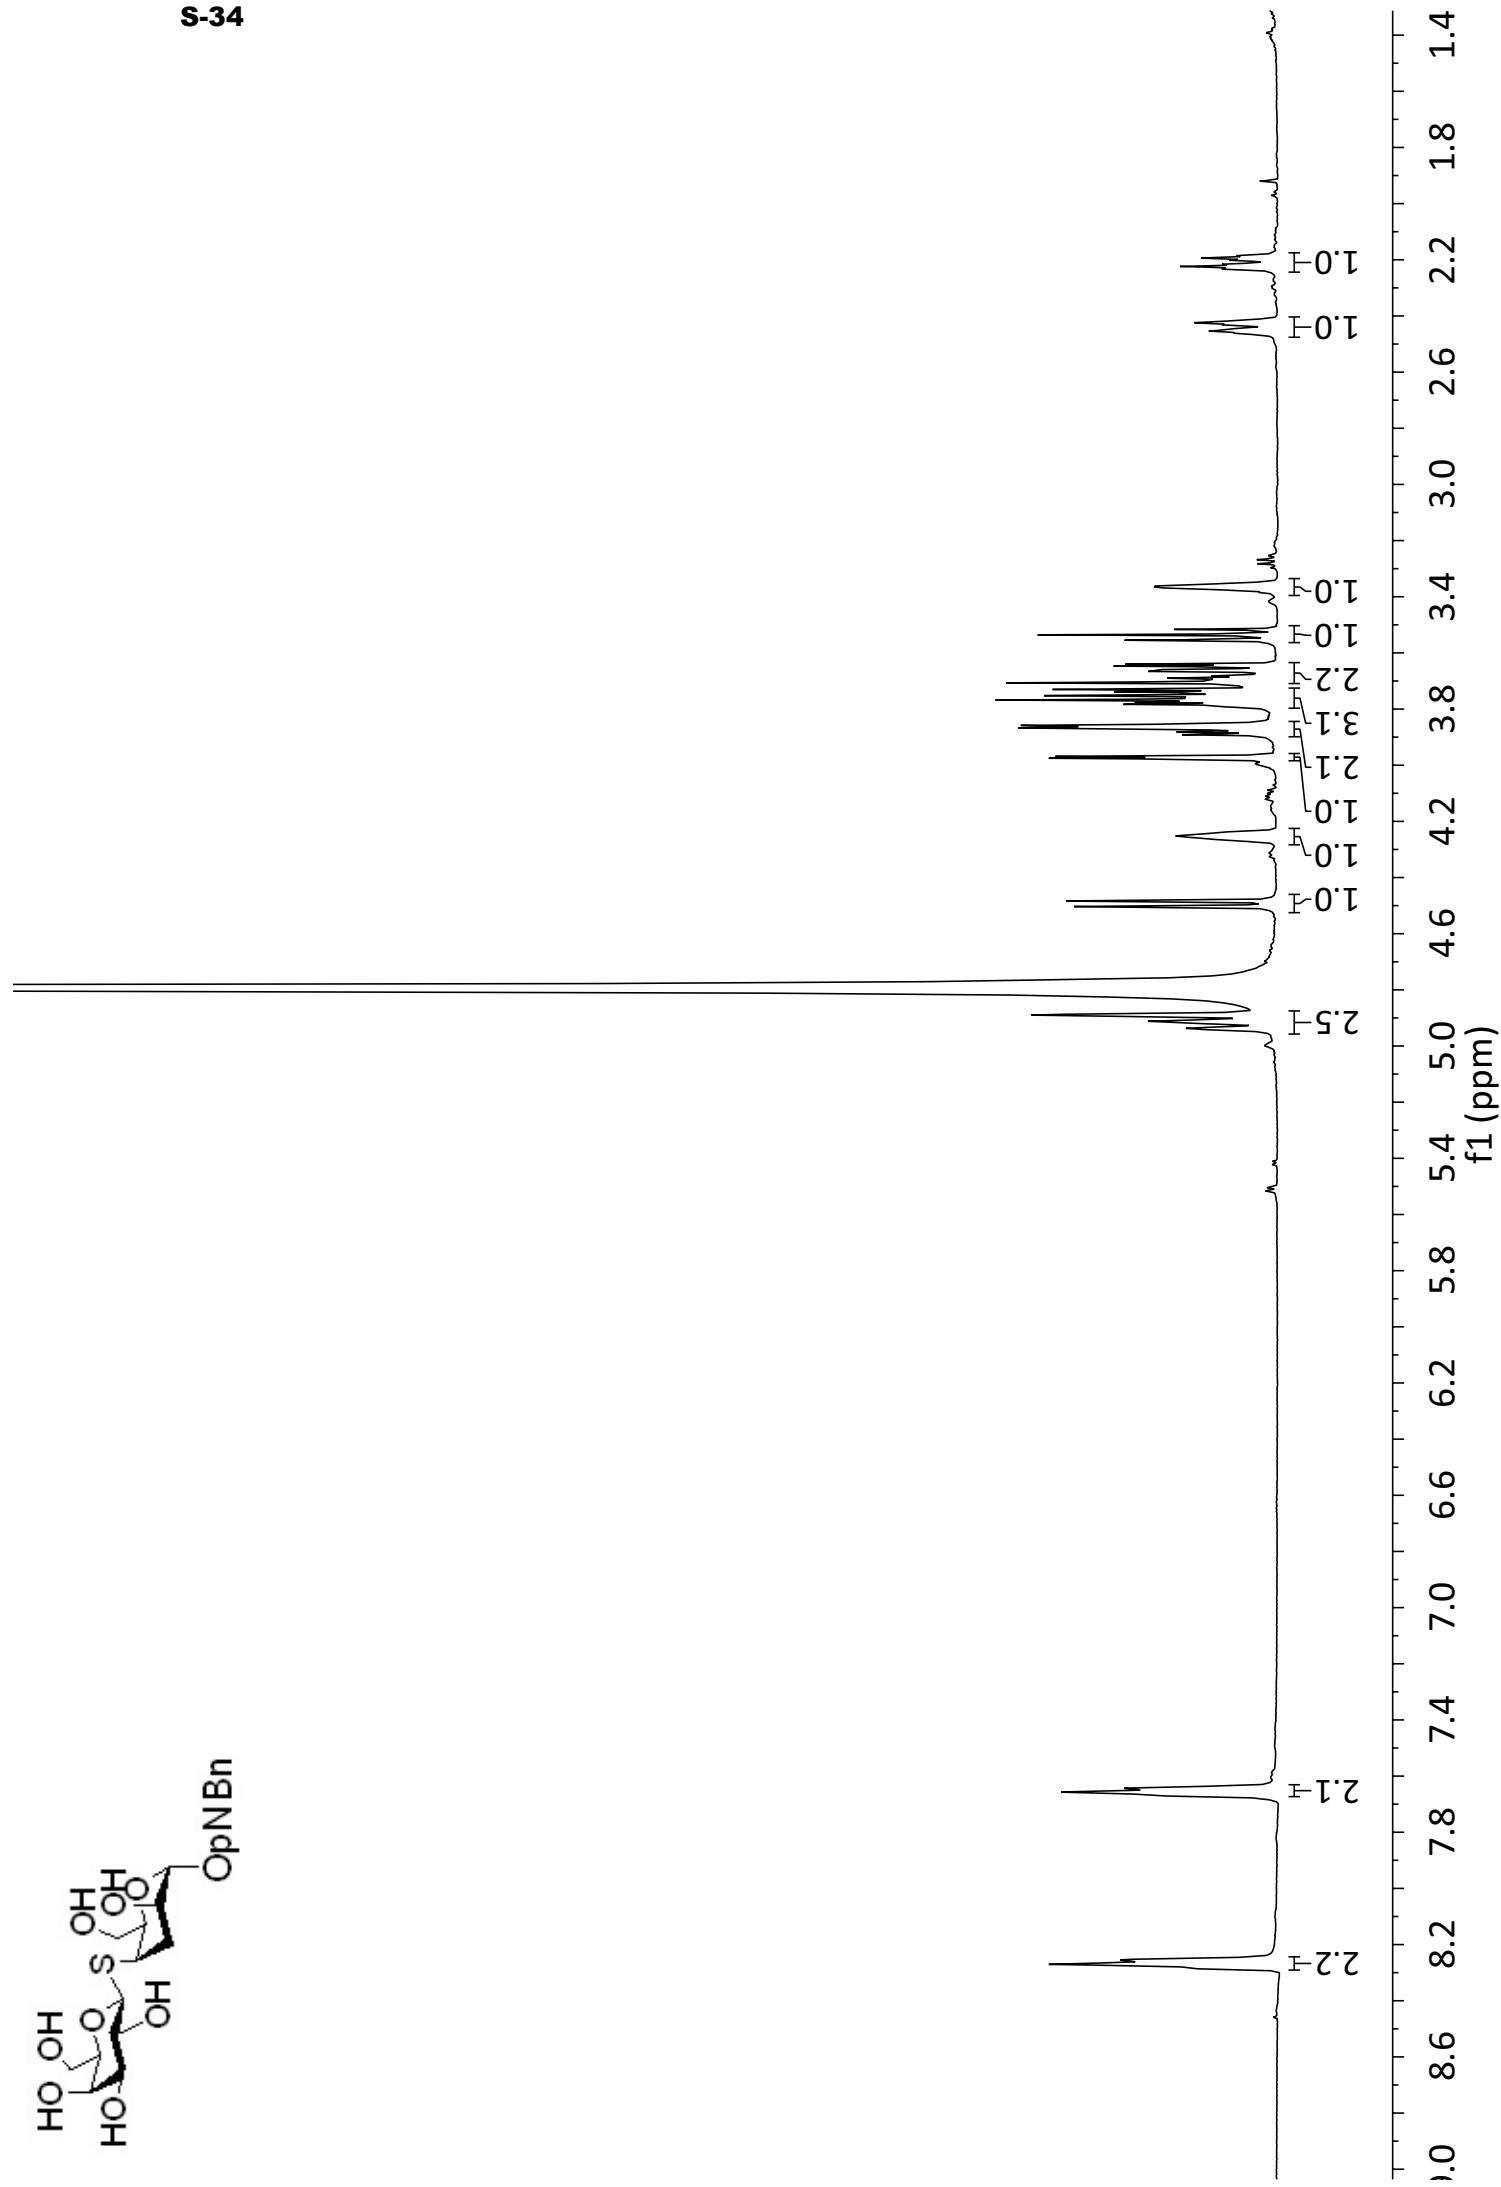

<sup>1</sup>H-NMR Spectrum of compound **20** (500 MHz, CDCl<sub>3</sub>).

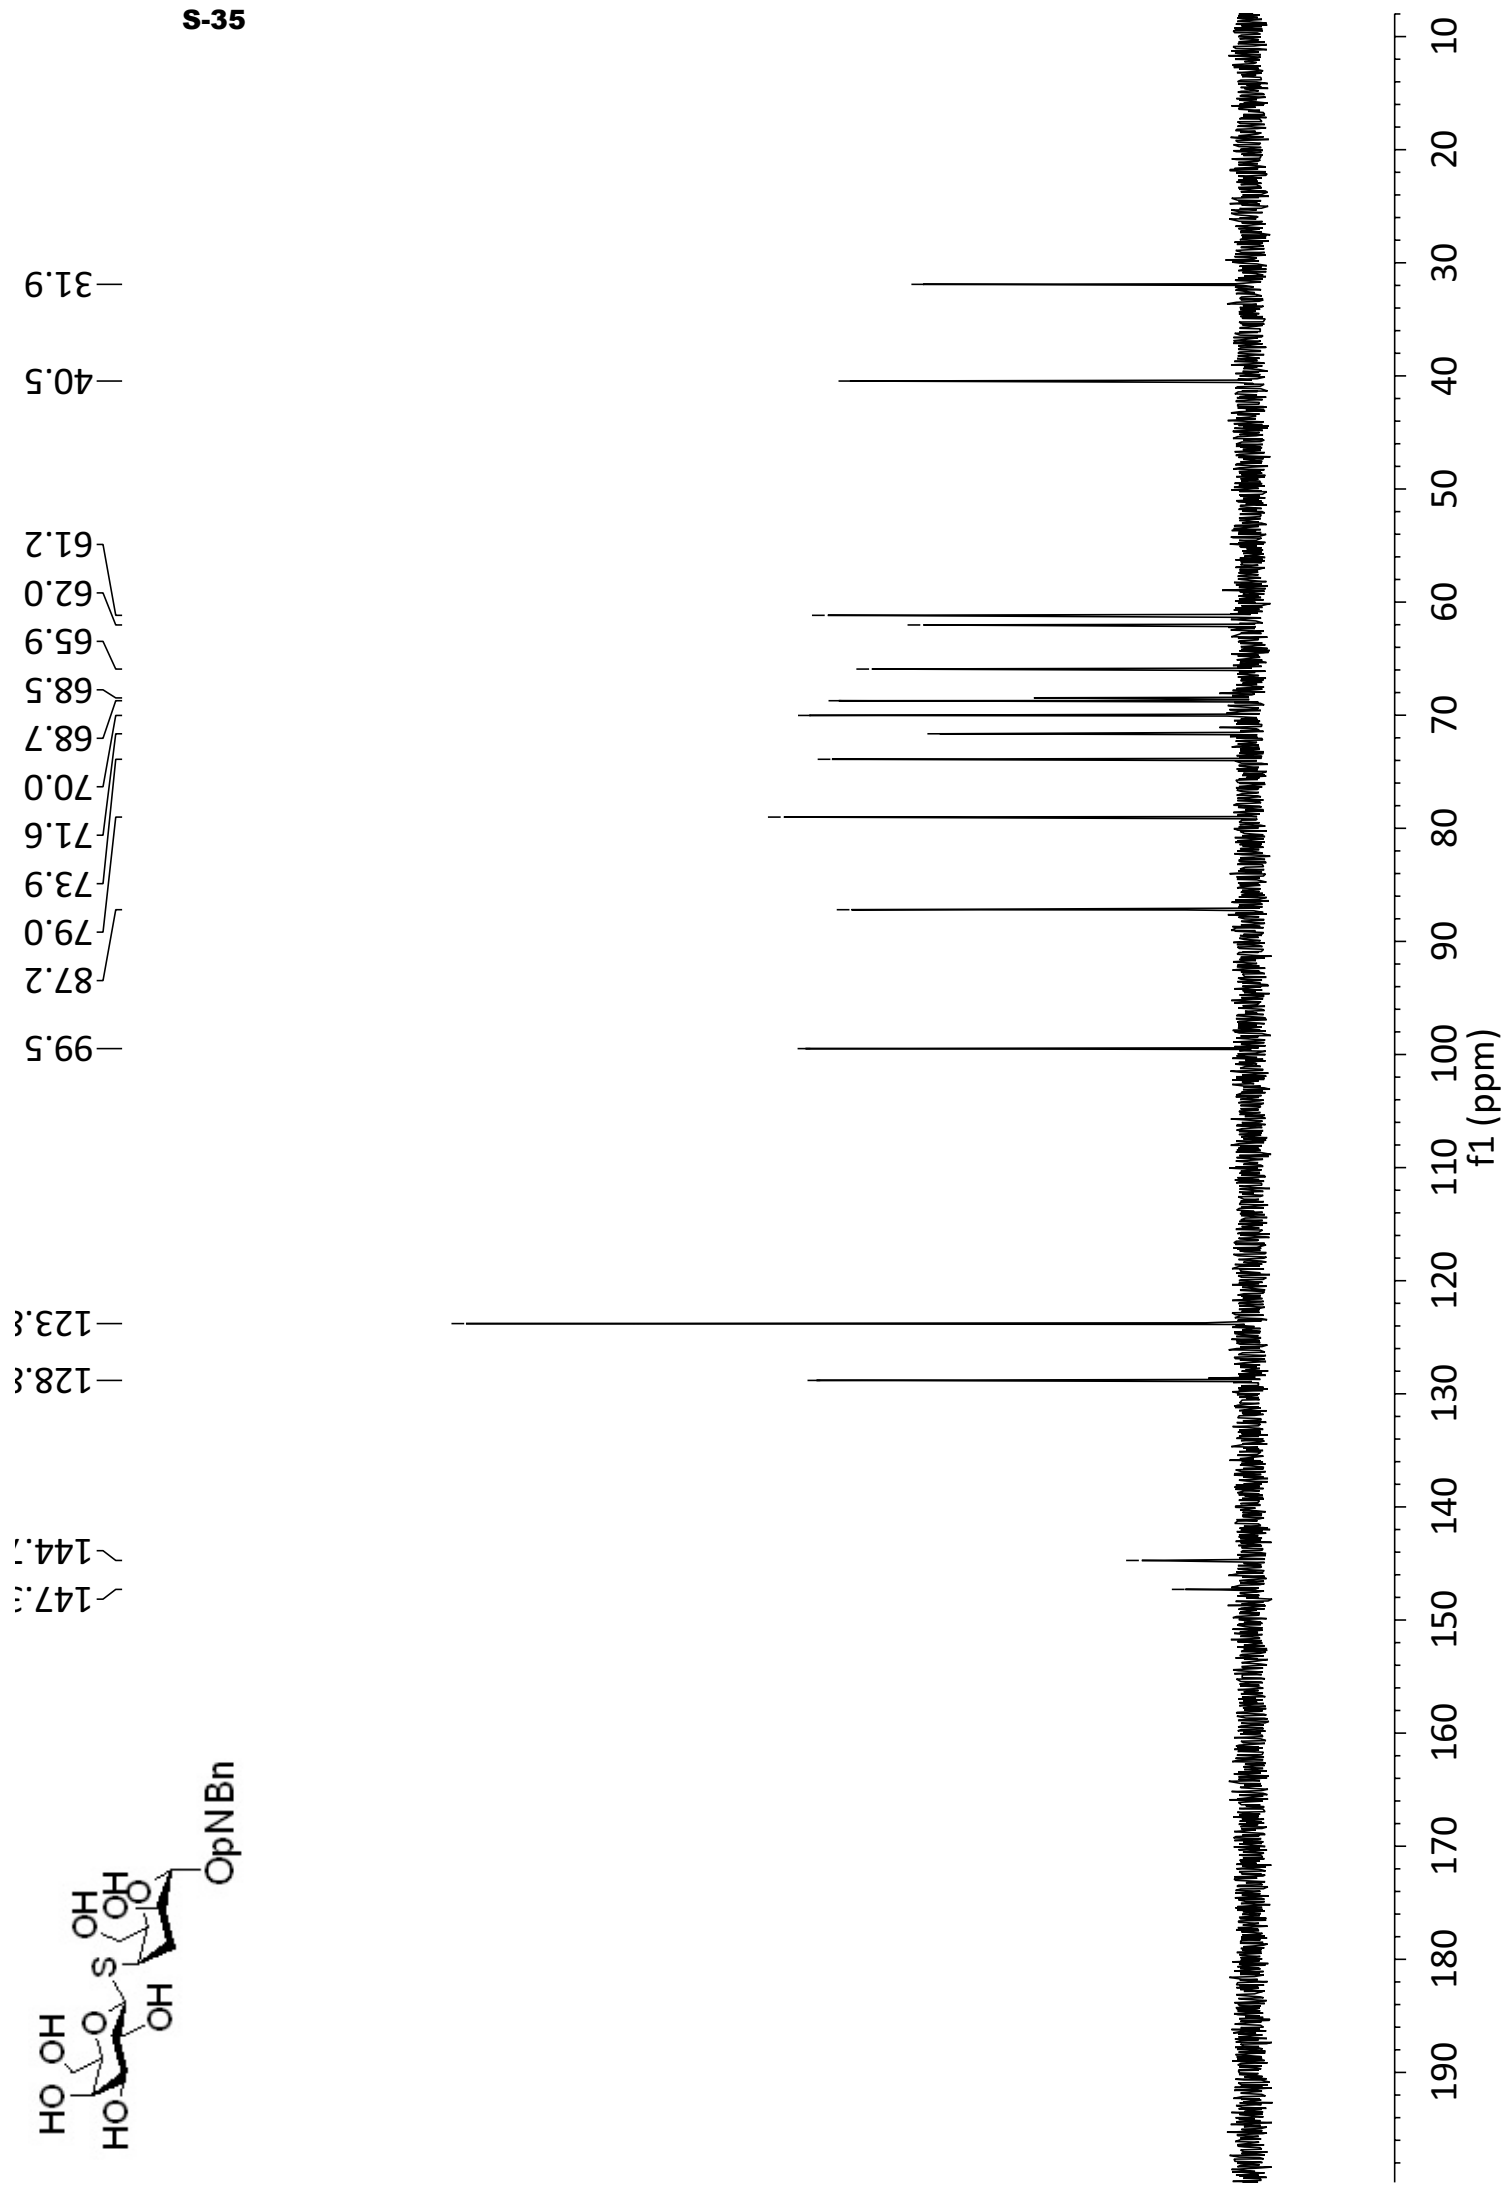

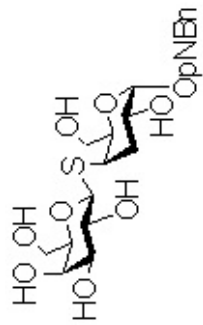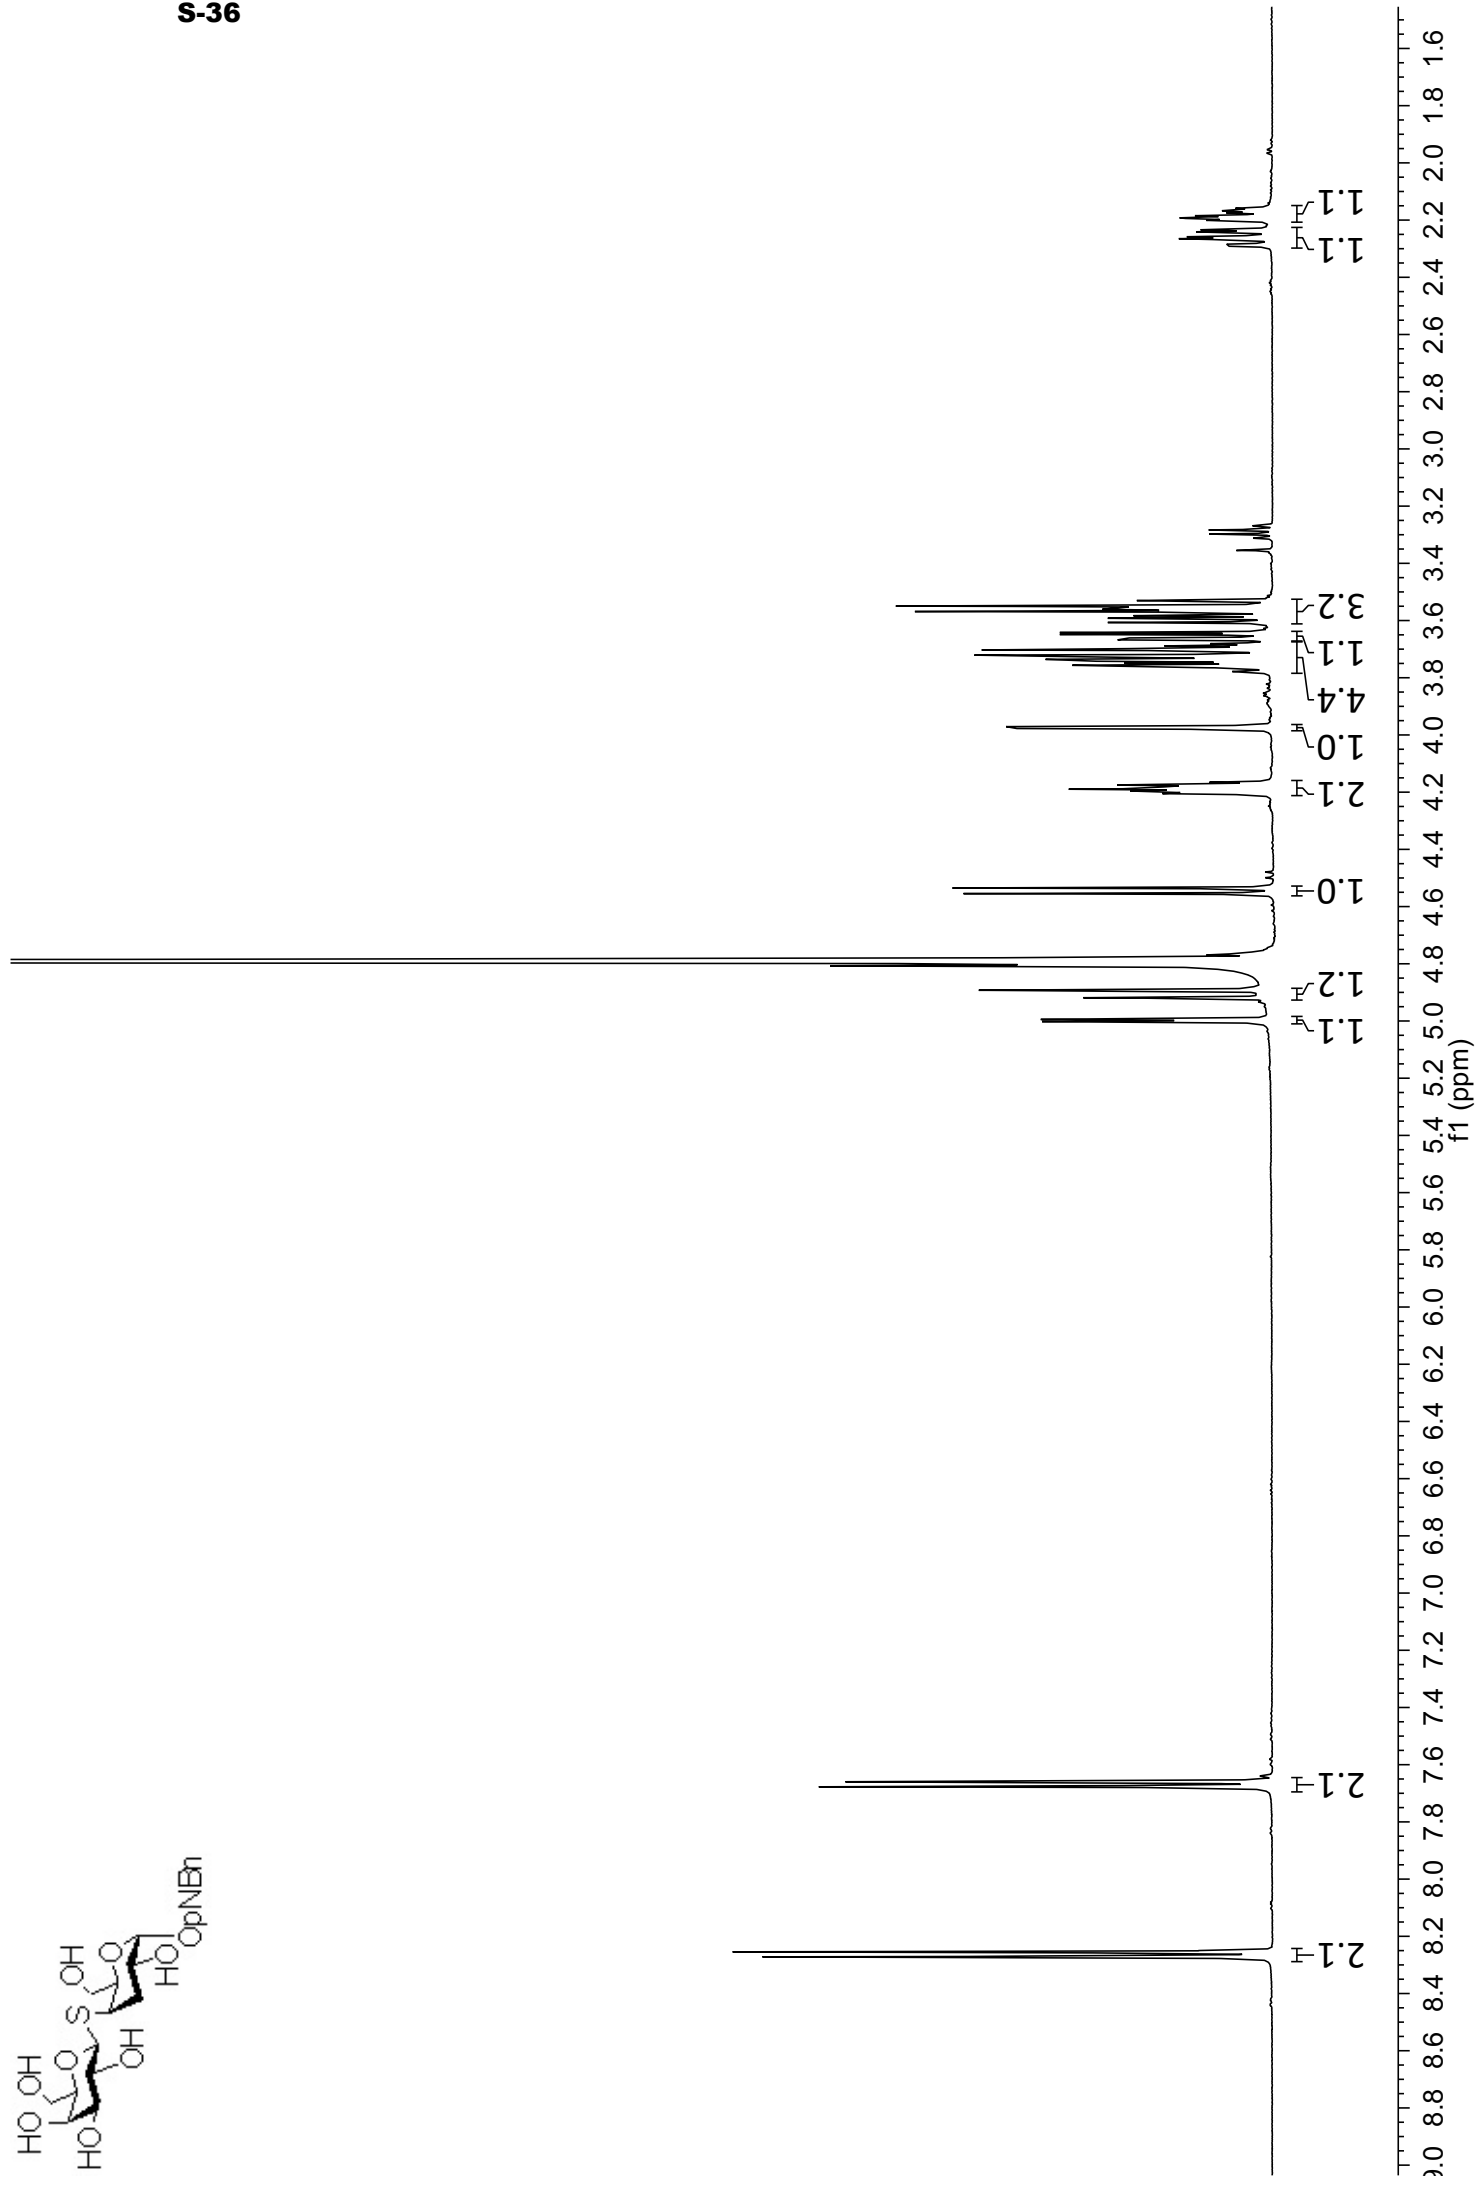

<sup>1</sup>H-NMR Spectrum of compound 21 (500 MHz, CDCl<sub>3</sub>).

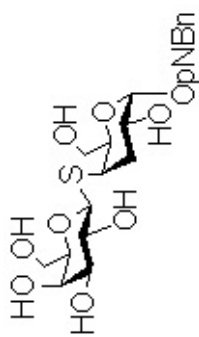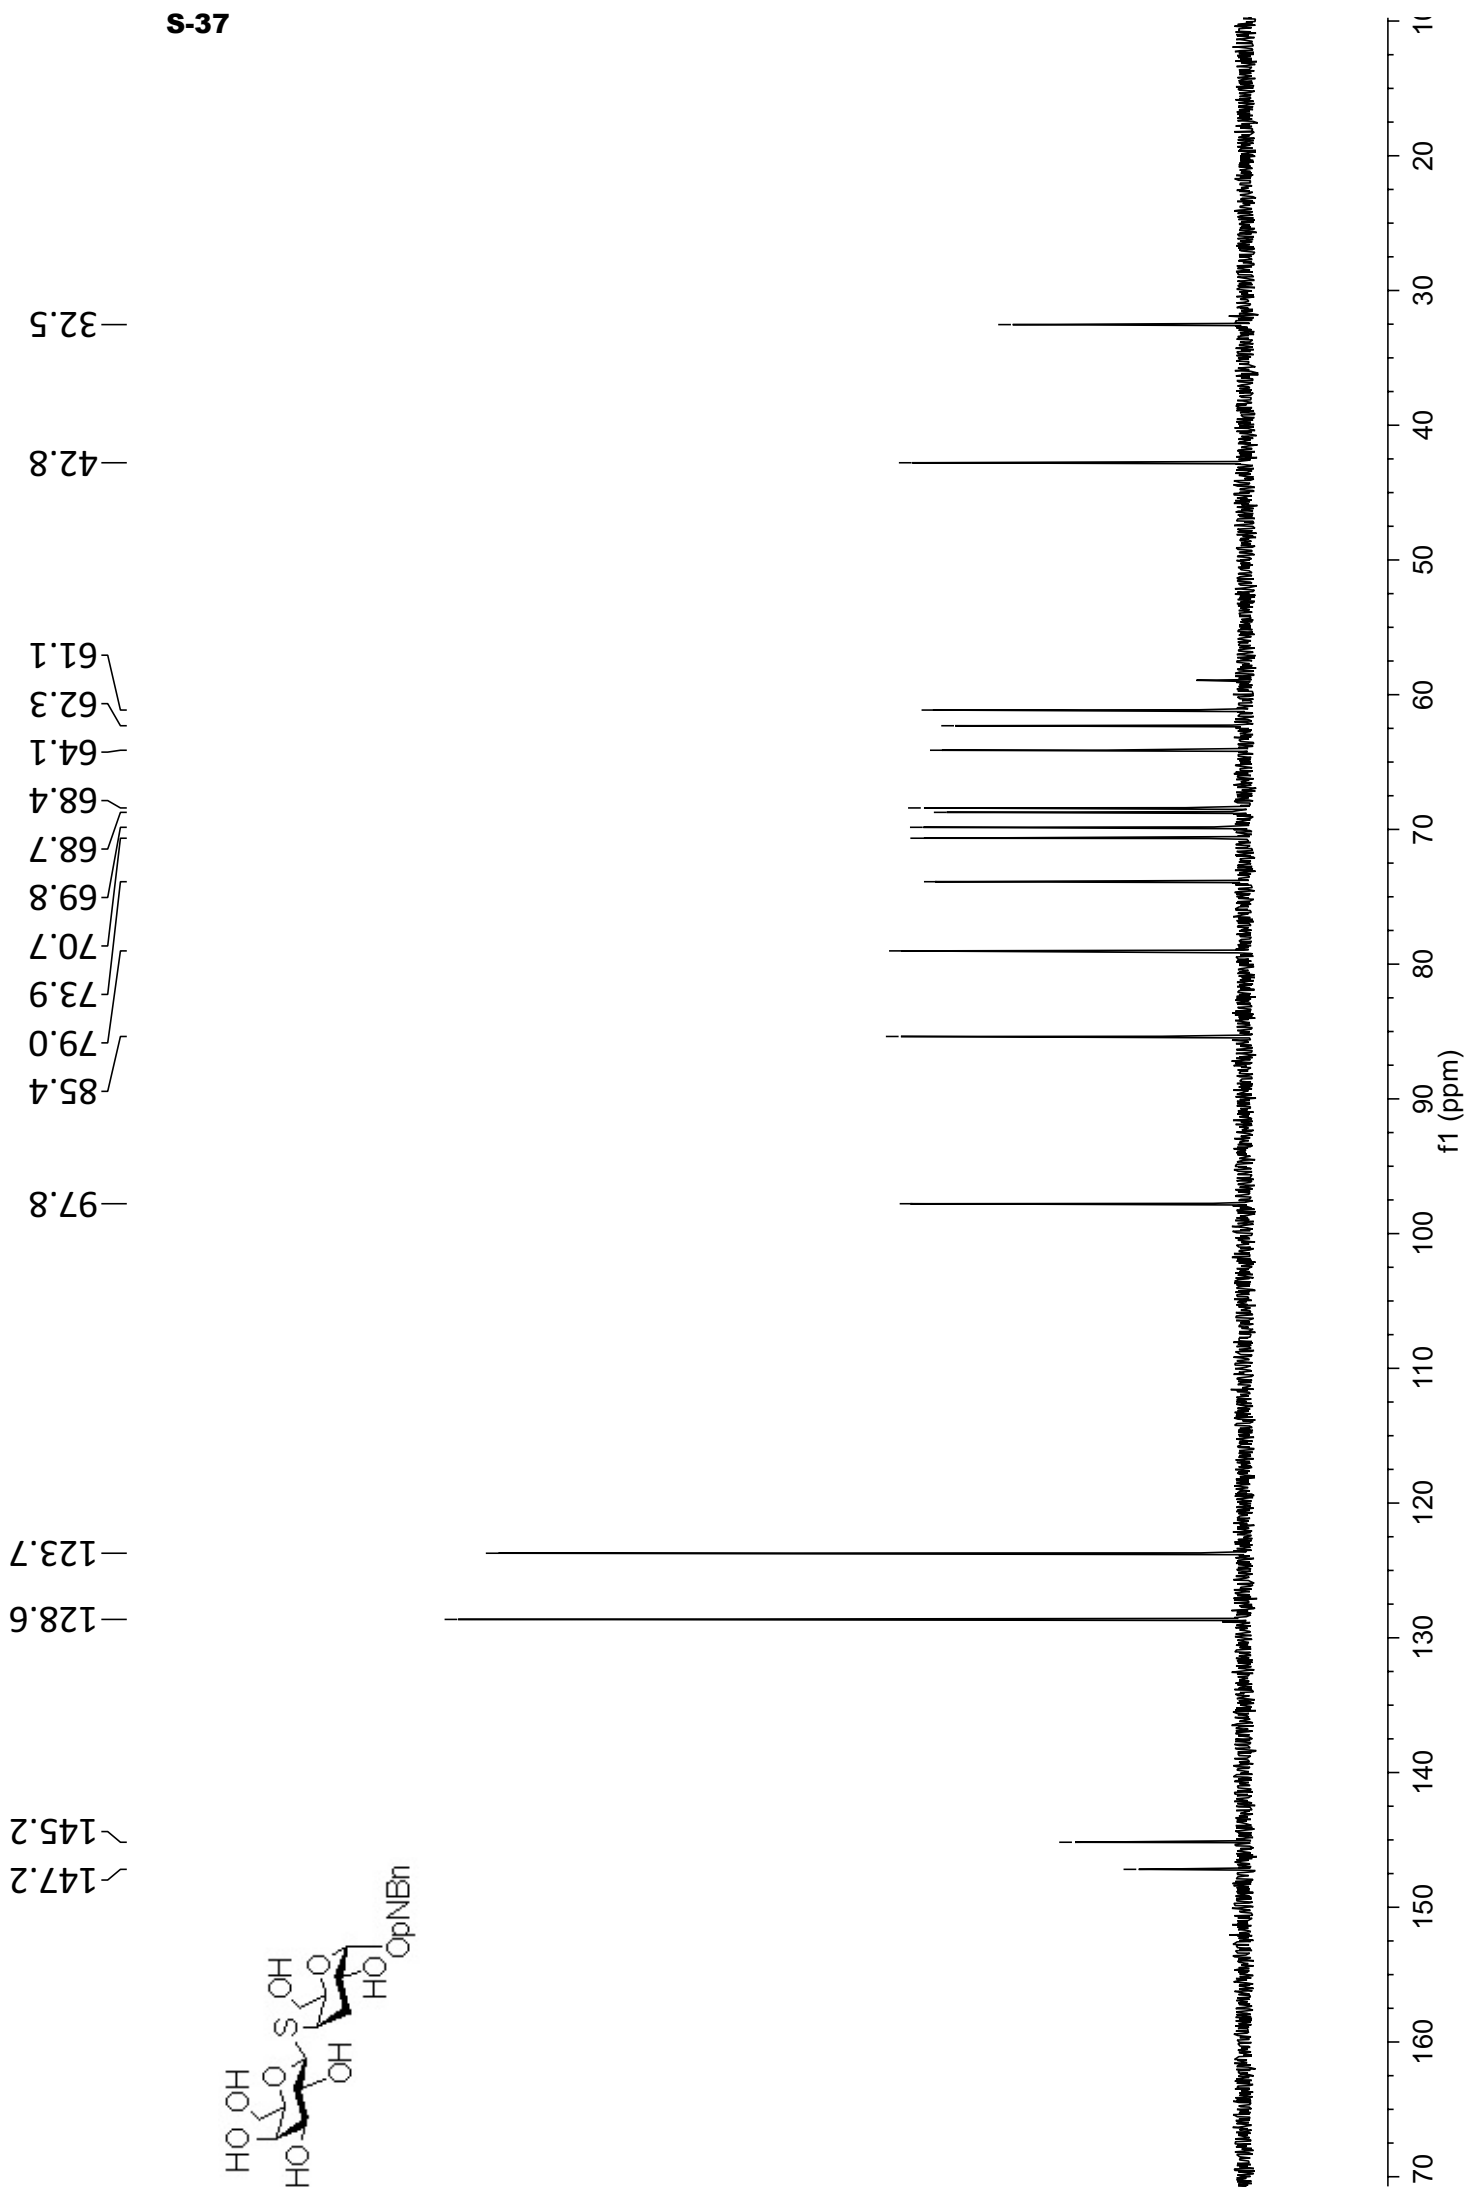

<sup>13</sup>C-NMR Spectrum of compound 21 (125.7 MHz, CDCl<sub>3</sub>).

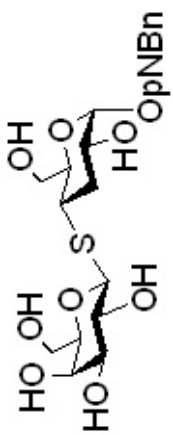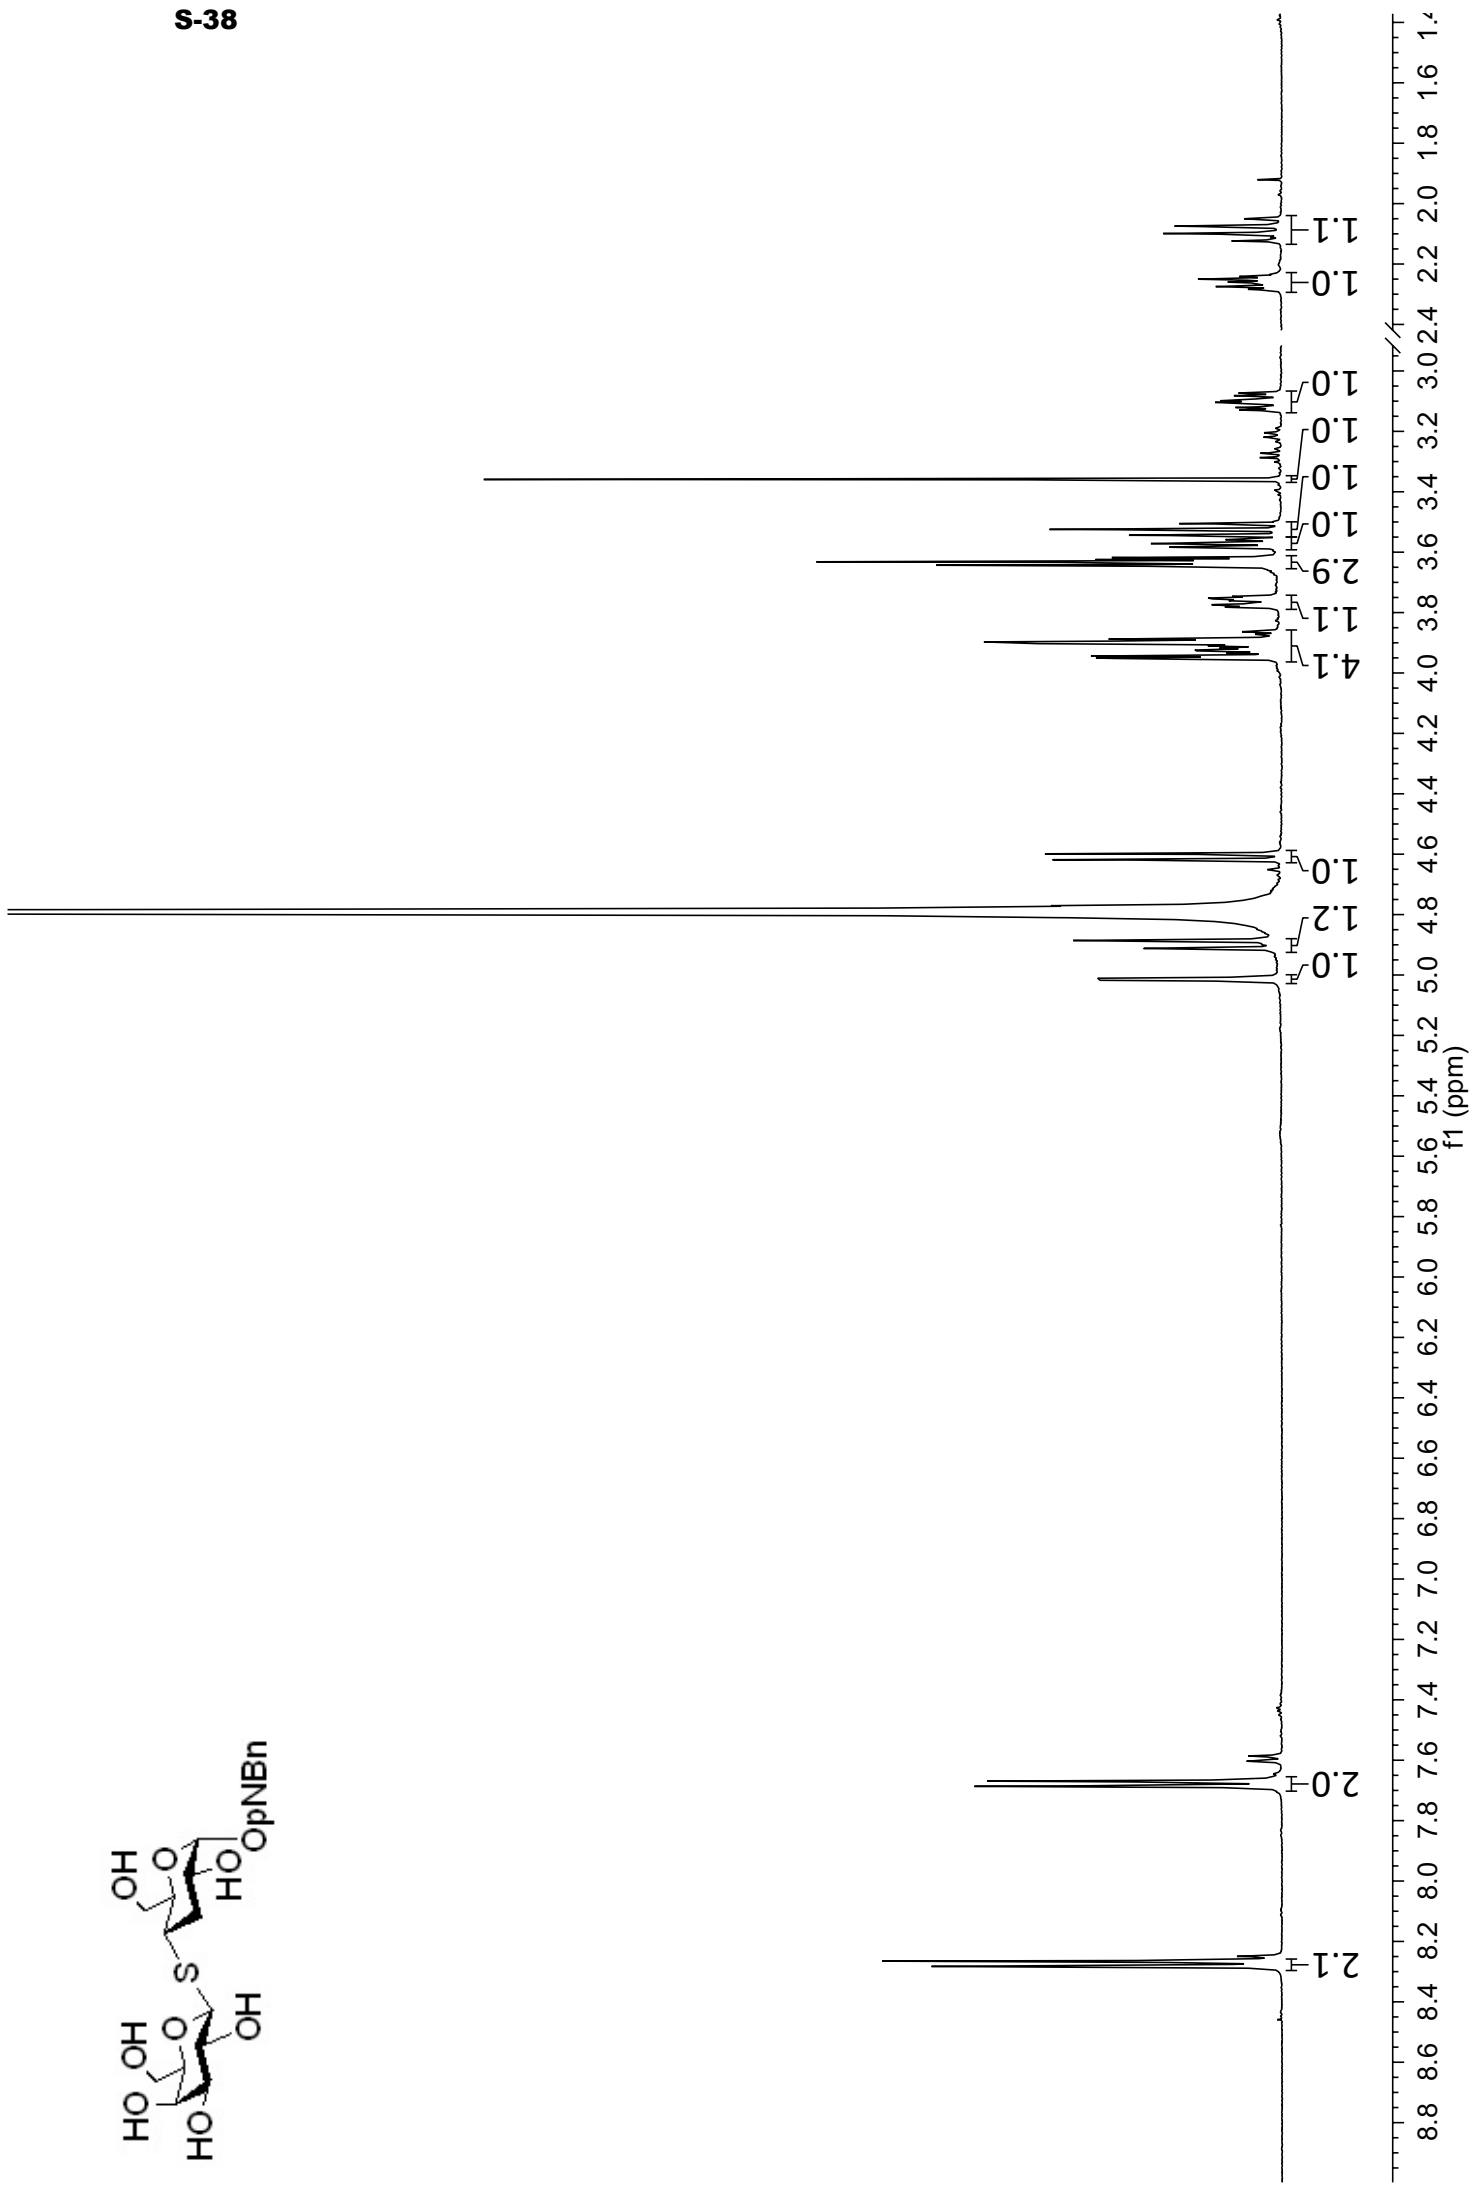

<sup>1</sup>H-NMR Spectrum of compound 22 (500 MHz, CDCl<sub>3</sub>).

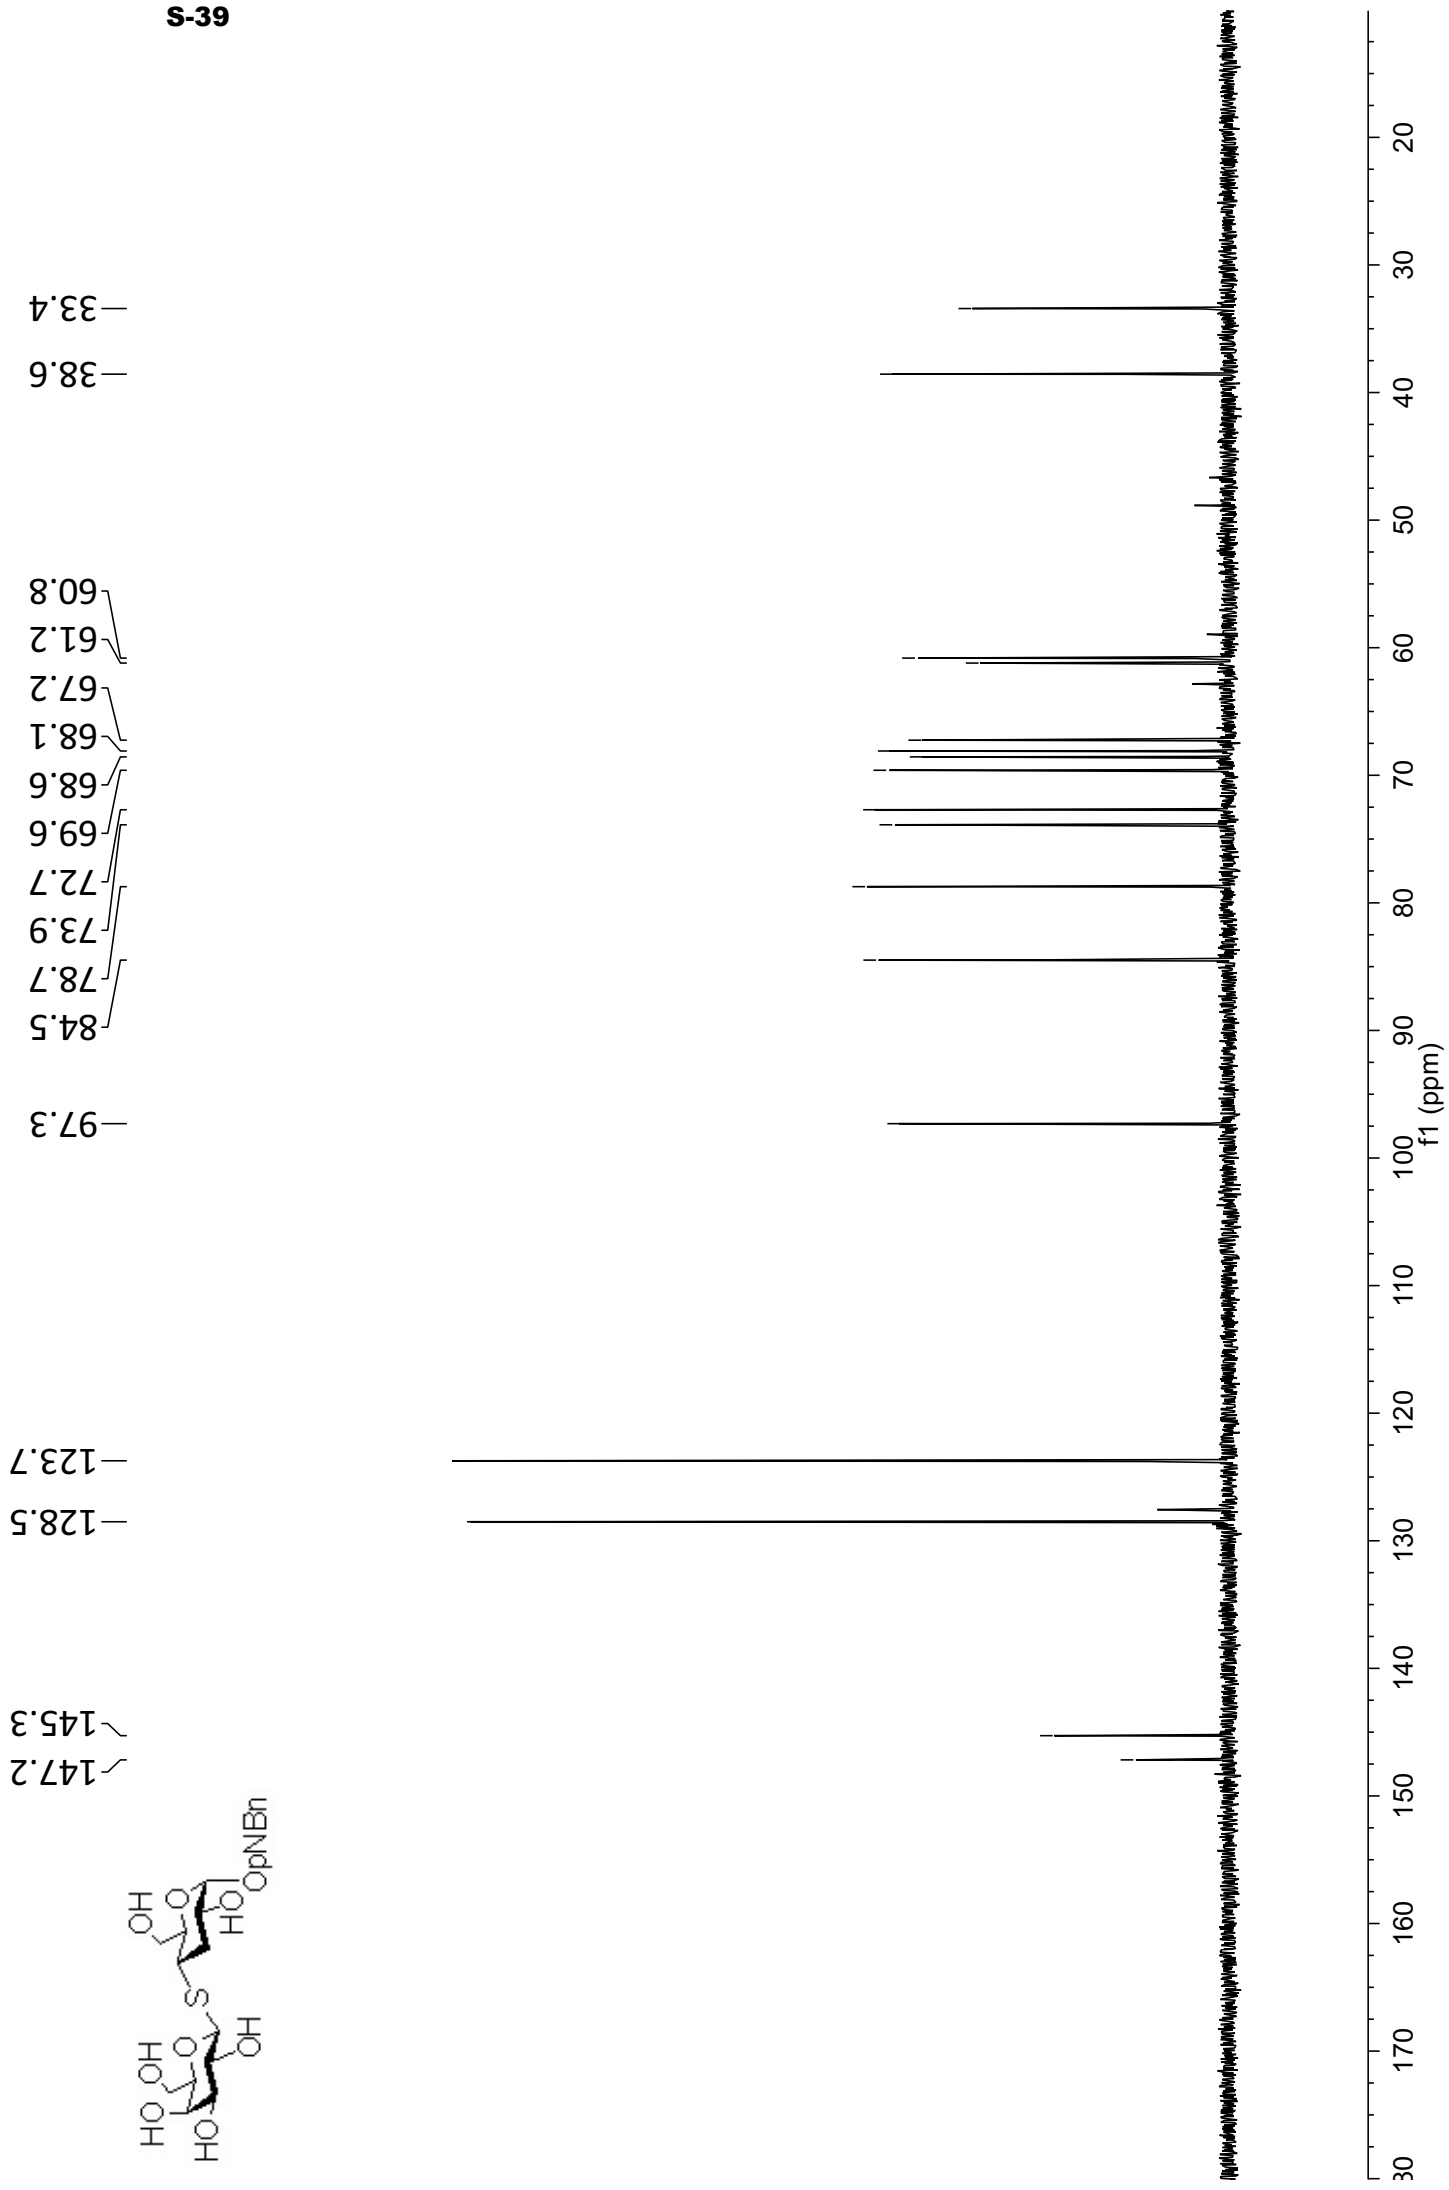

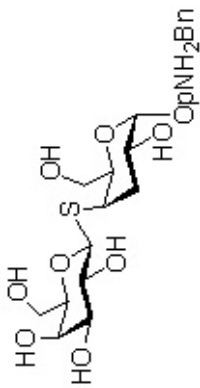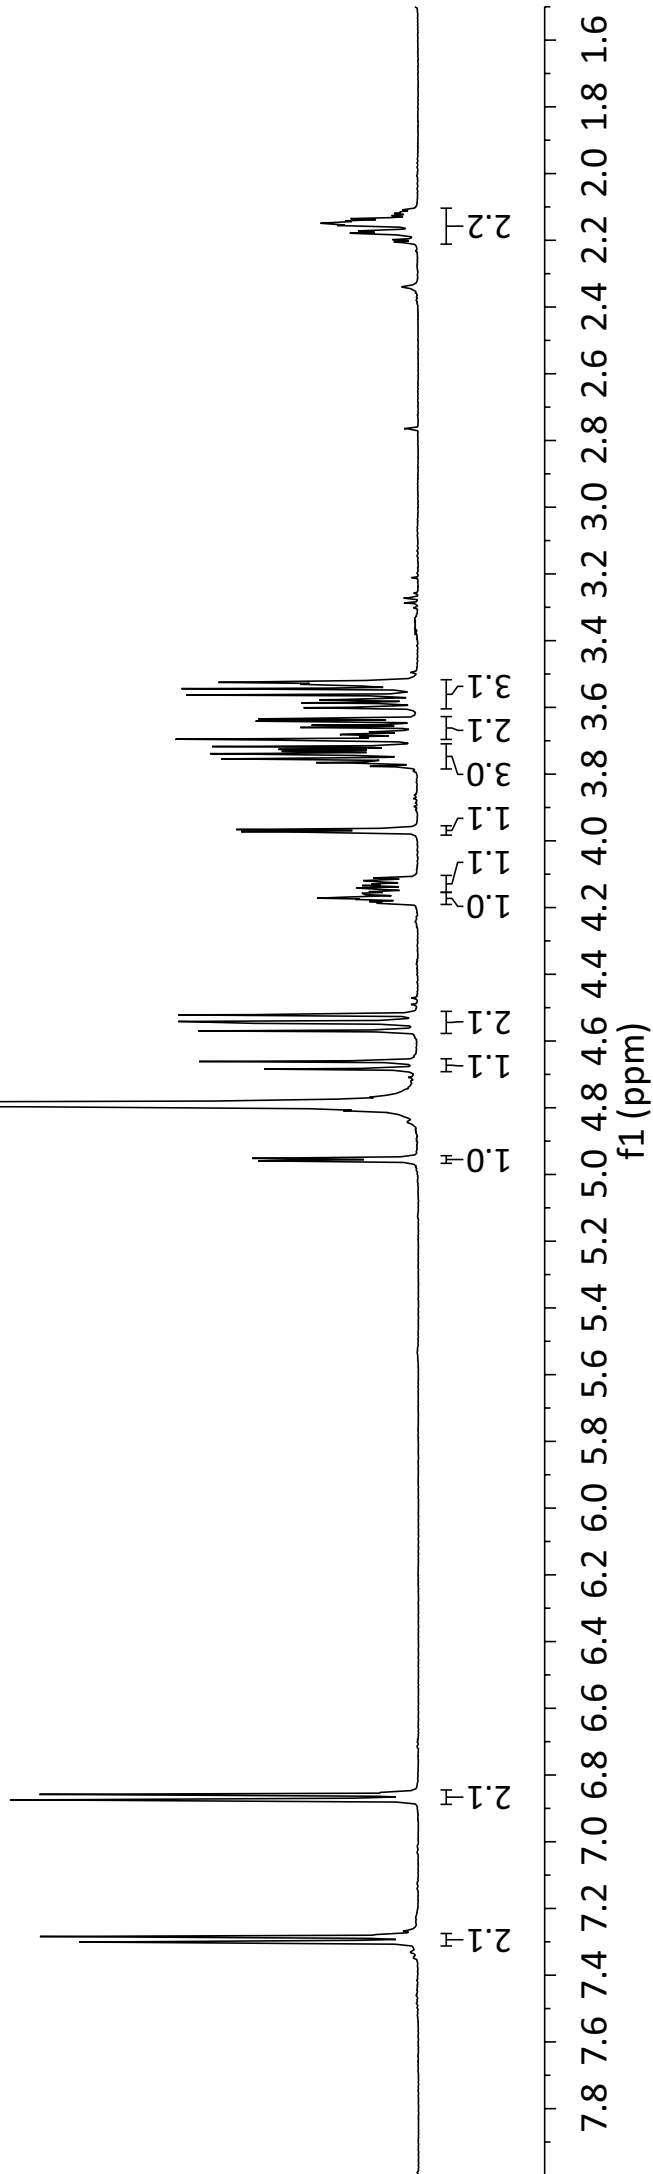

<sup>1</sup>H-NMR Spectrum of compound **23** (500 MHz, CDCl<sub>3</sub>).



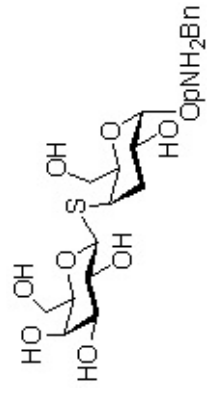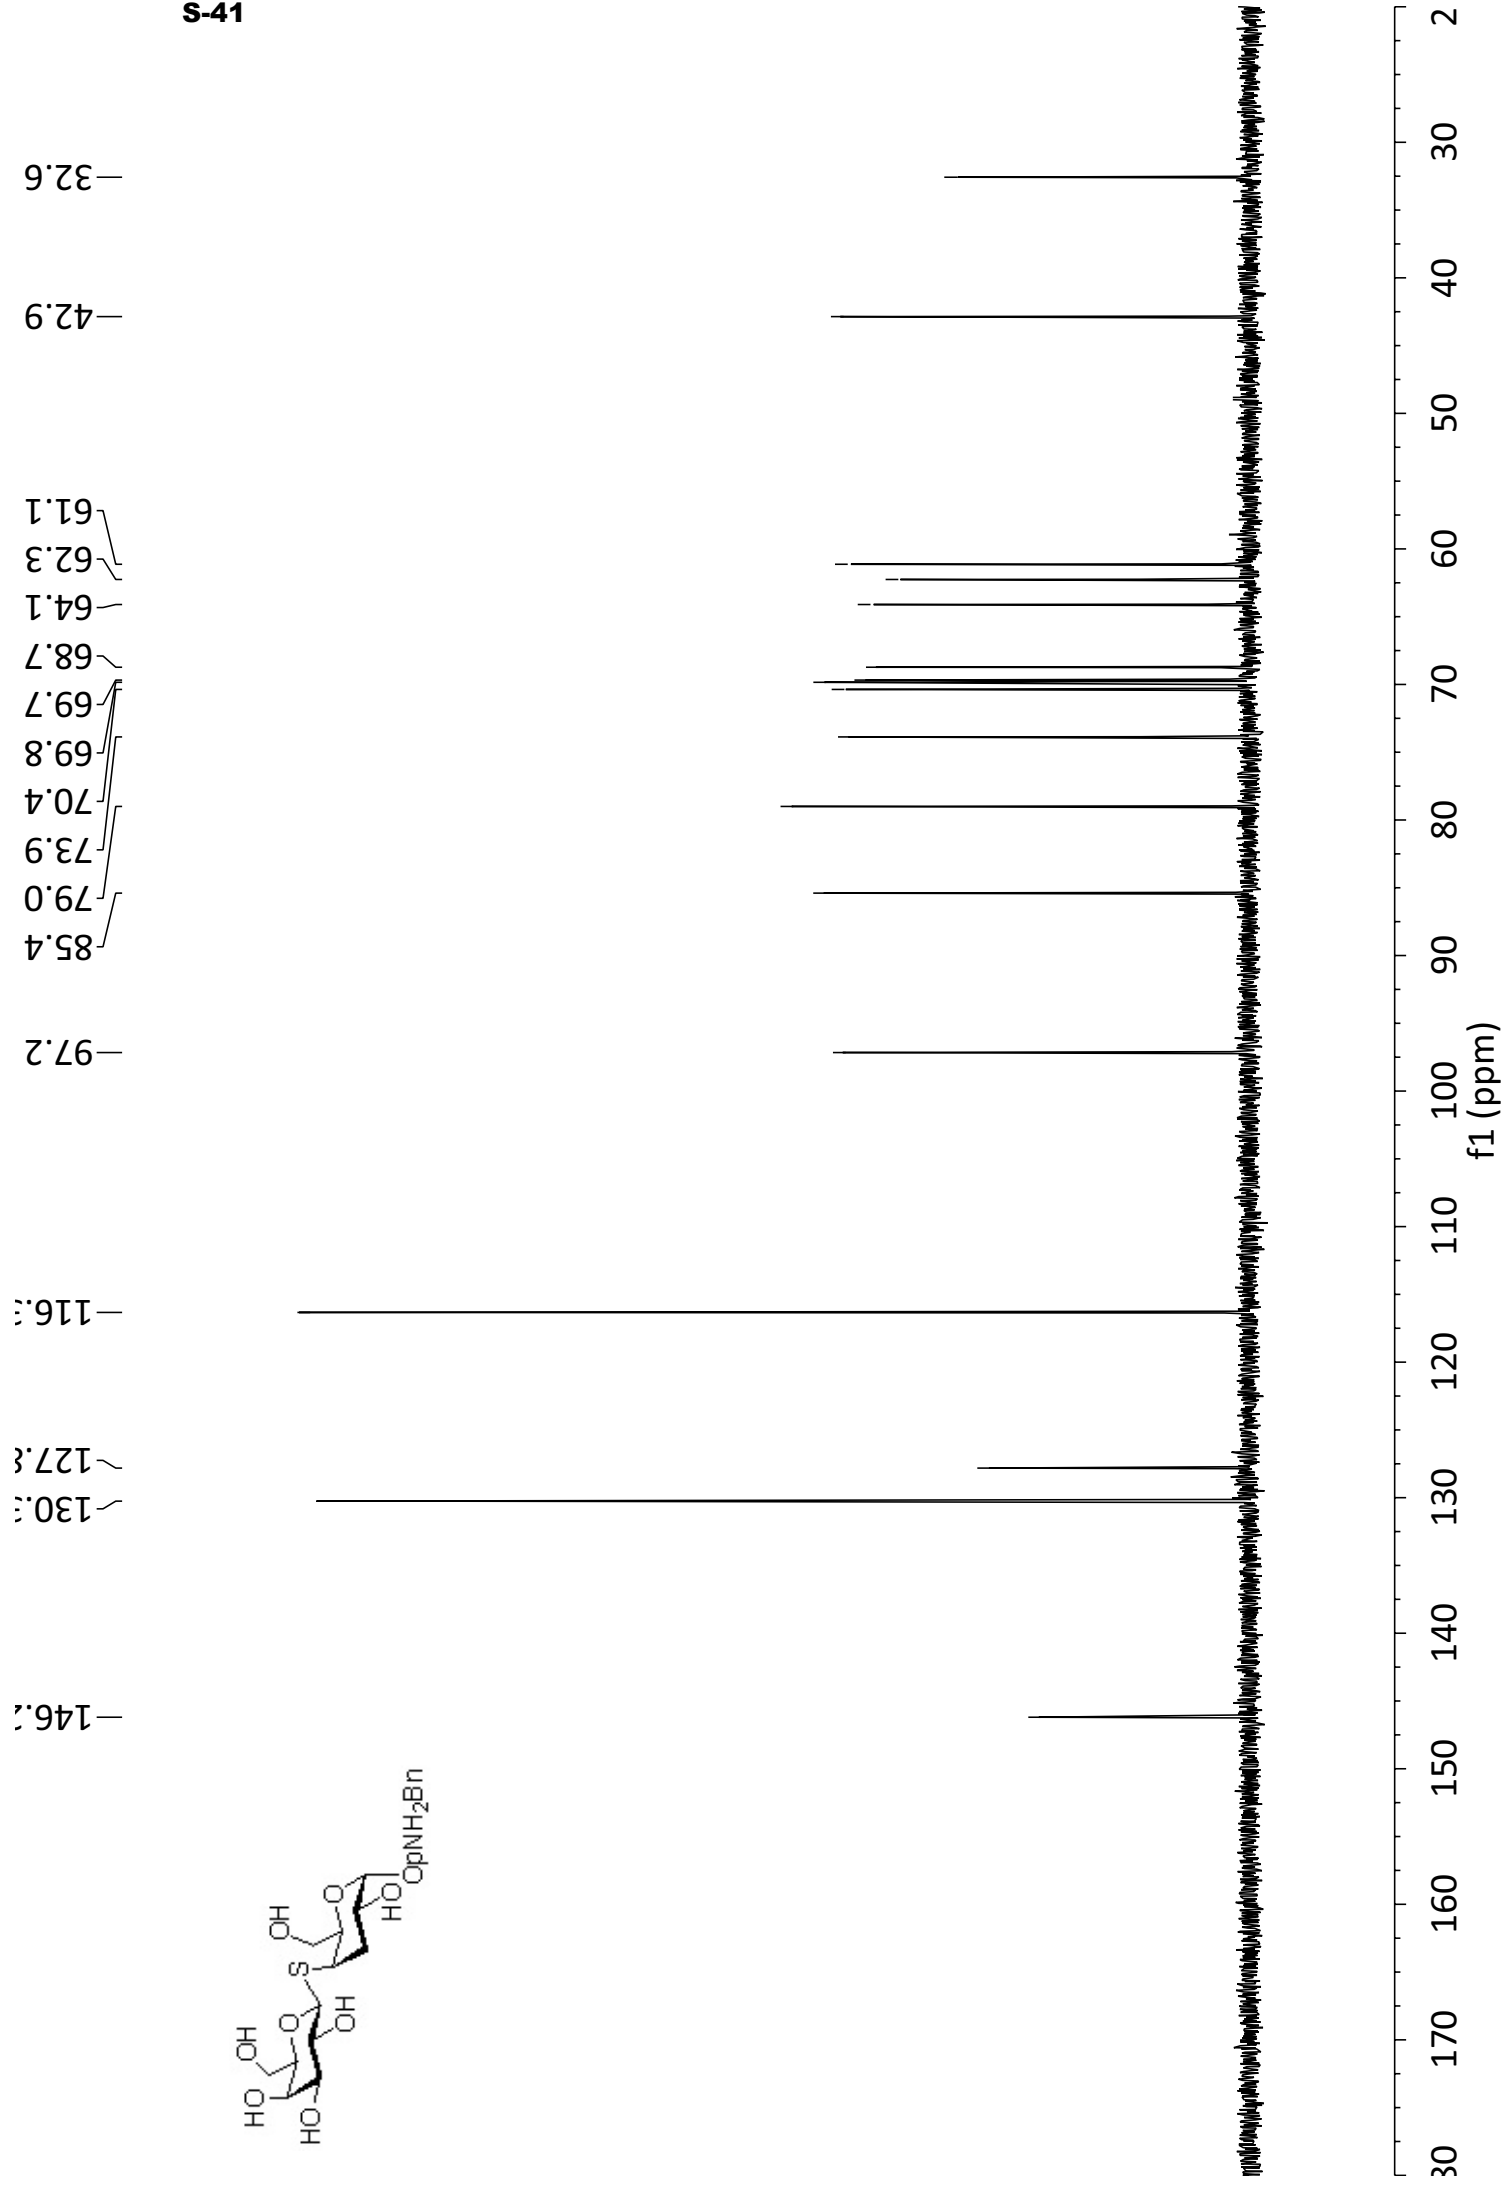

<sup>13</sup>C-NMR Spectrum of compound 23 (125.7 MHz, CDCl<sub>3</sub>).

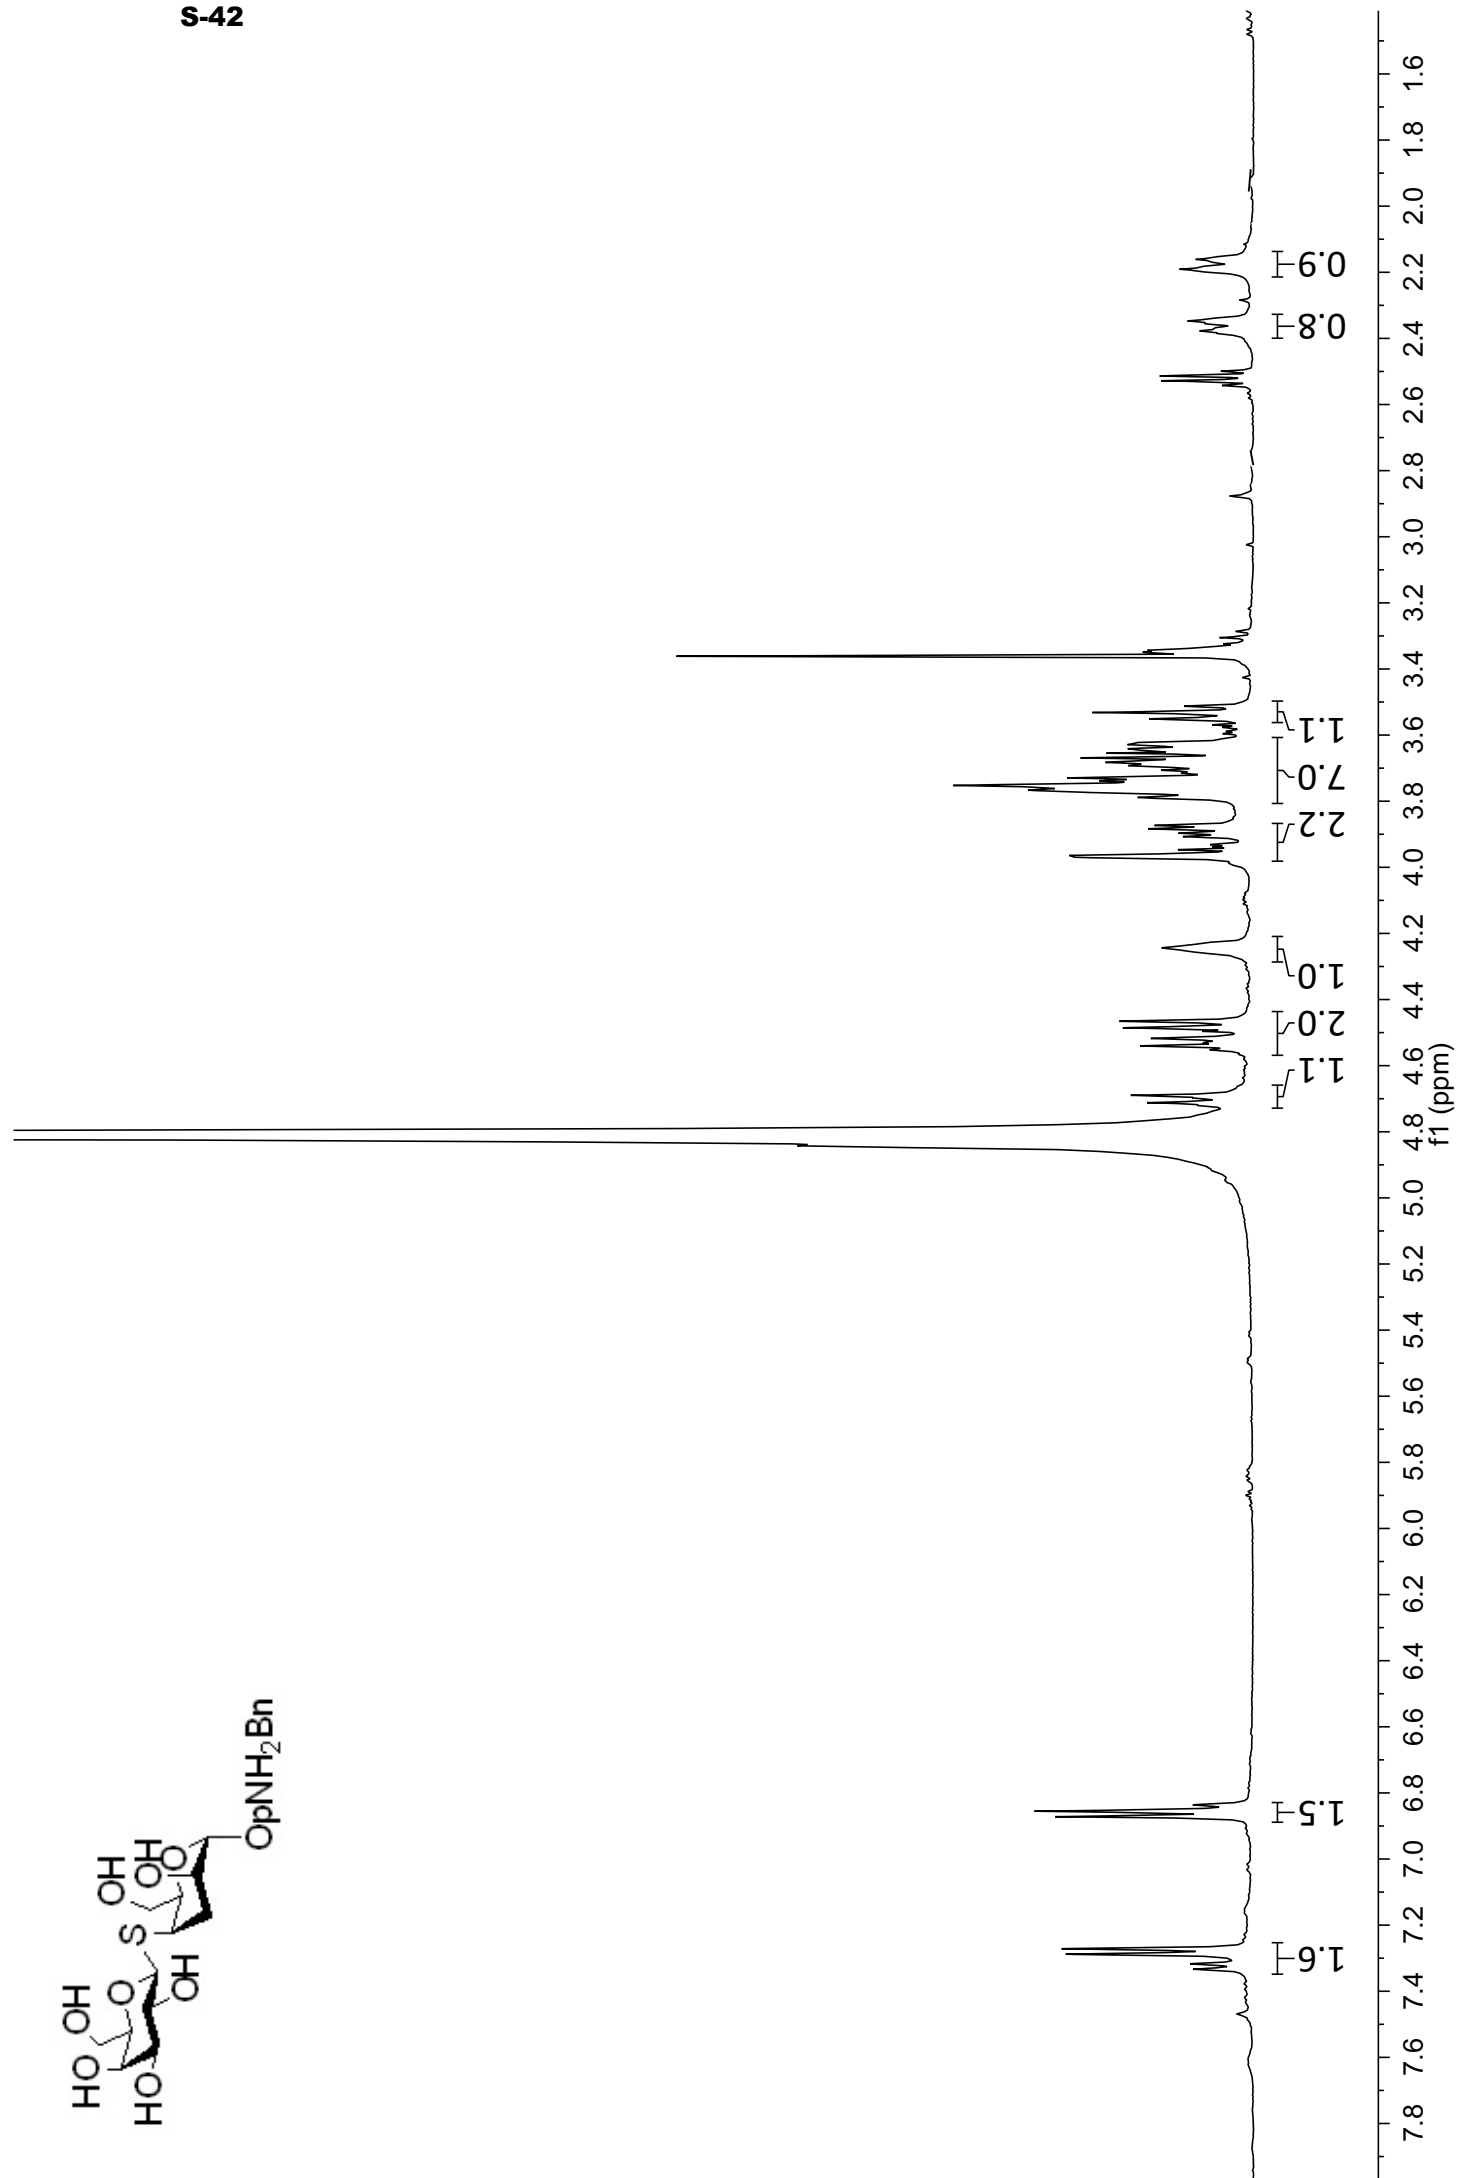 $^1\text{H-NMR}$  Spectrum of compound **24** (500 MHz,  $\text{CDCl}_3$ ).

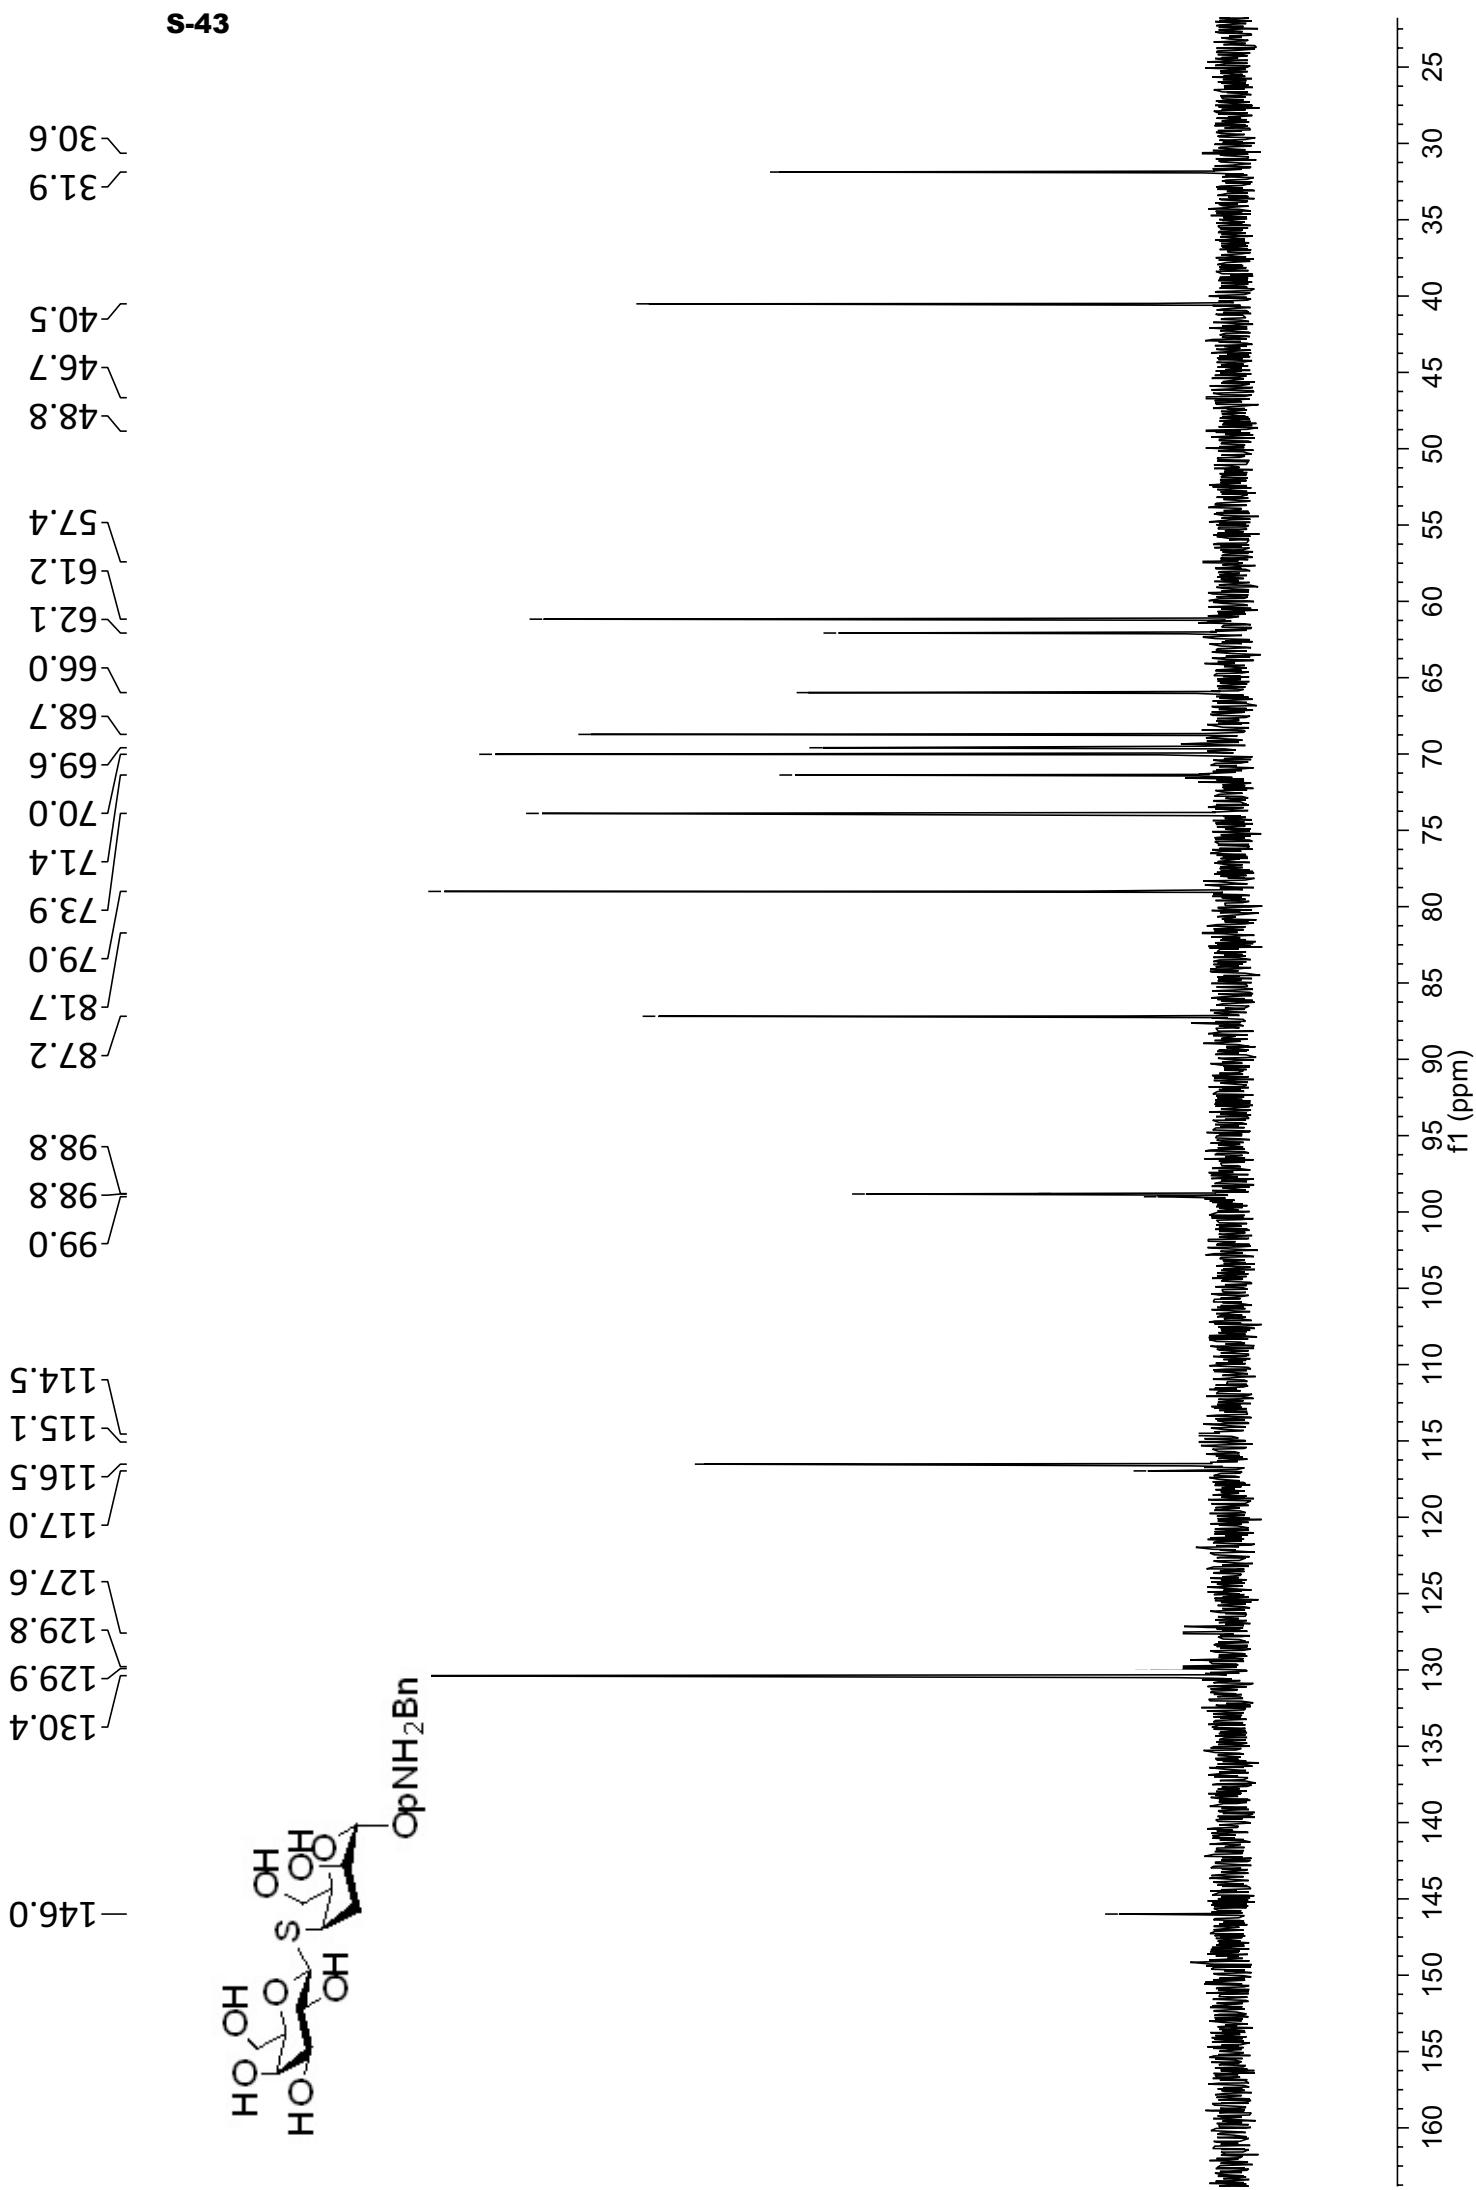



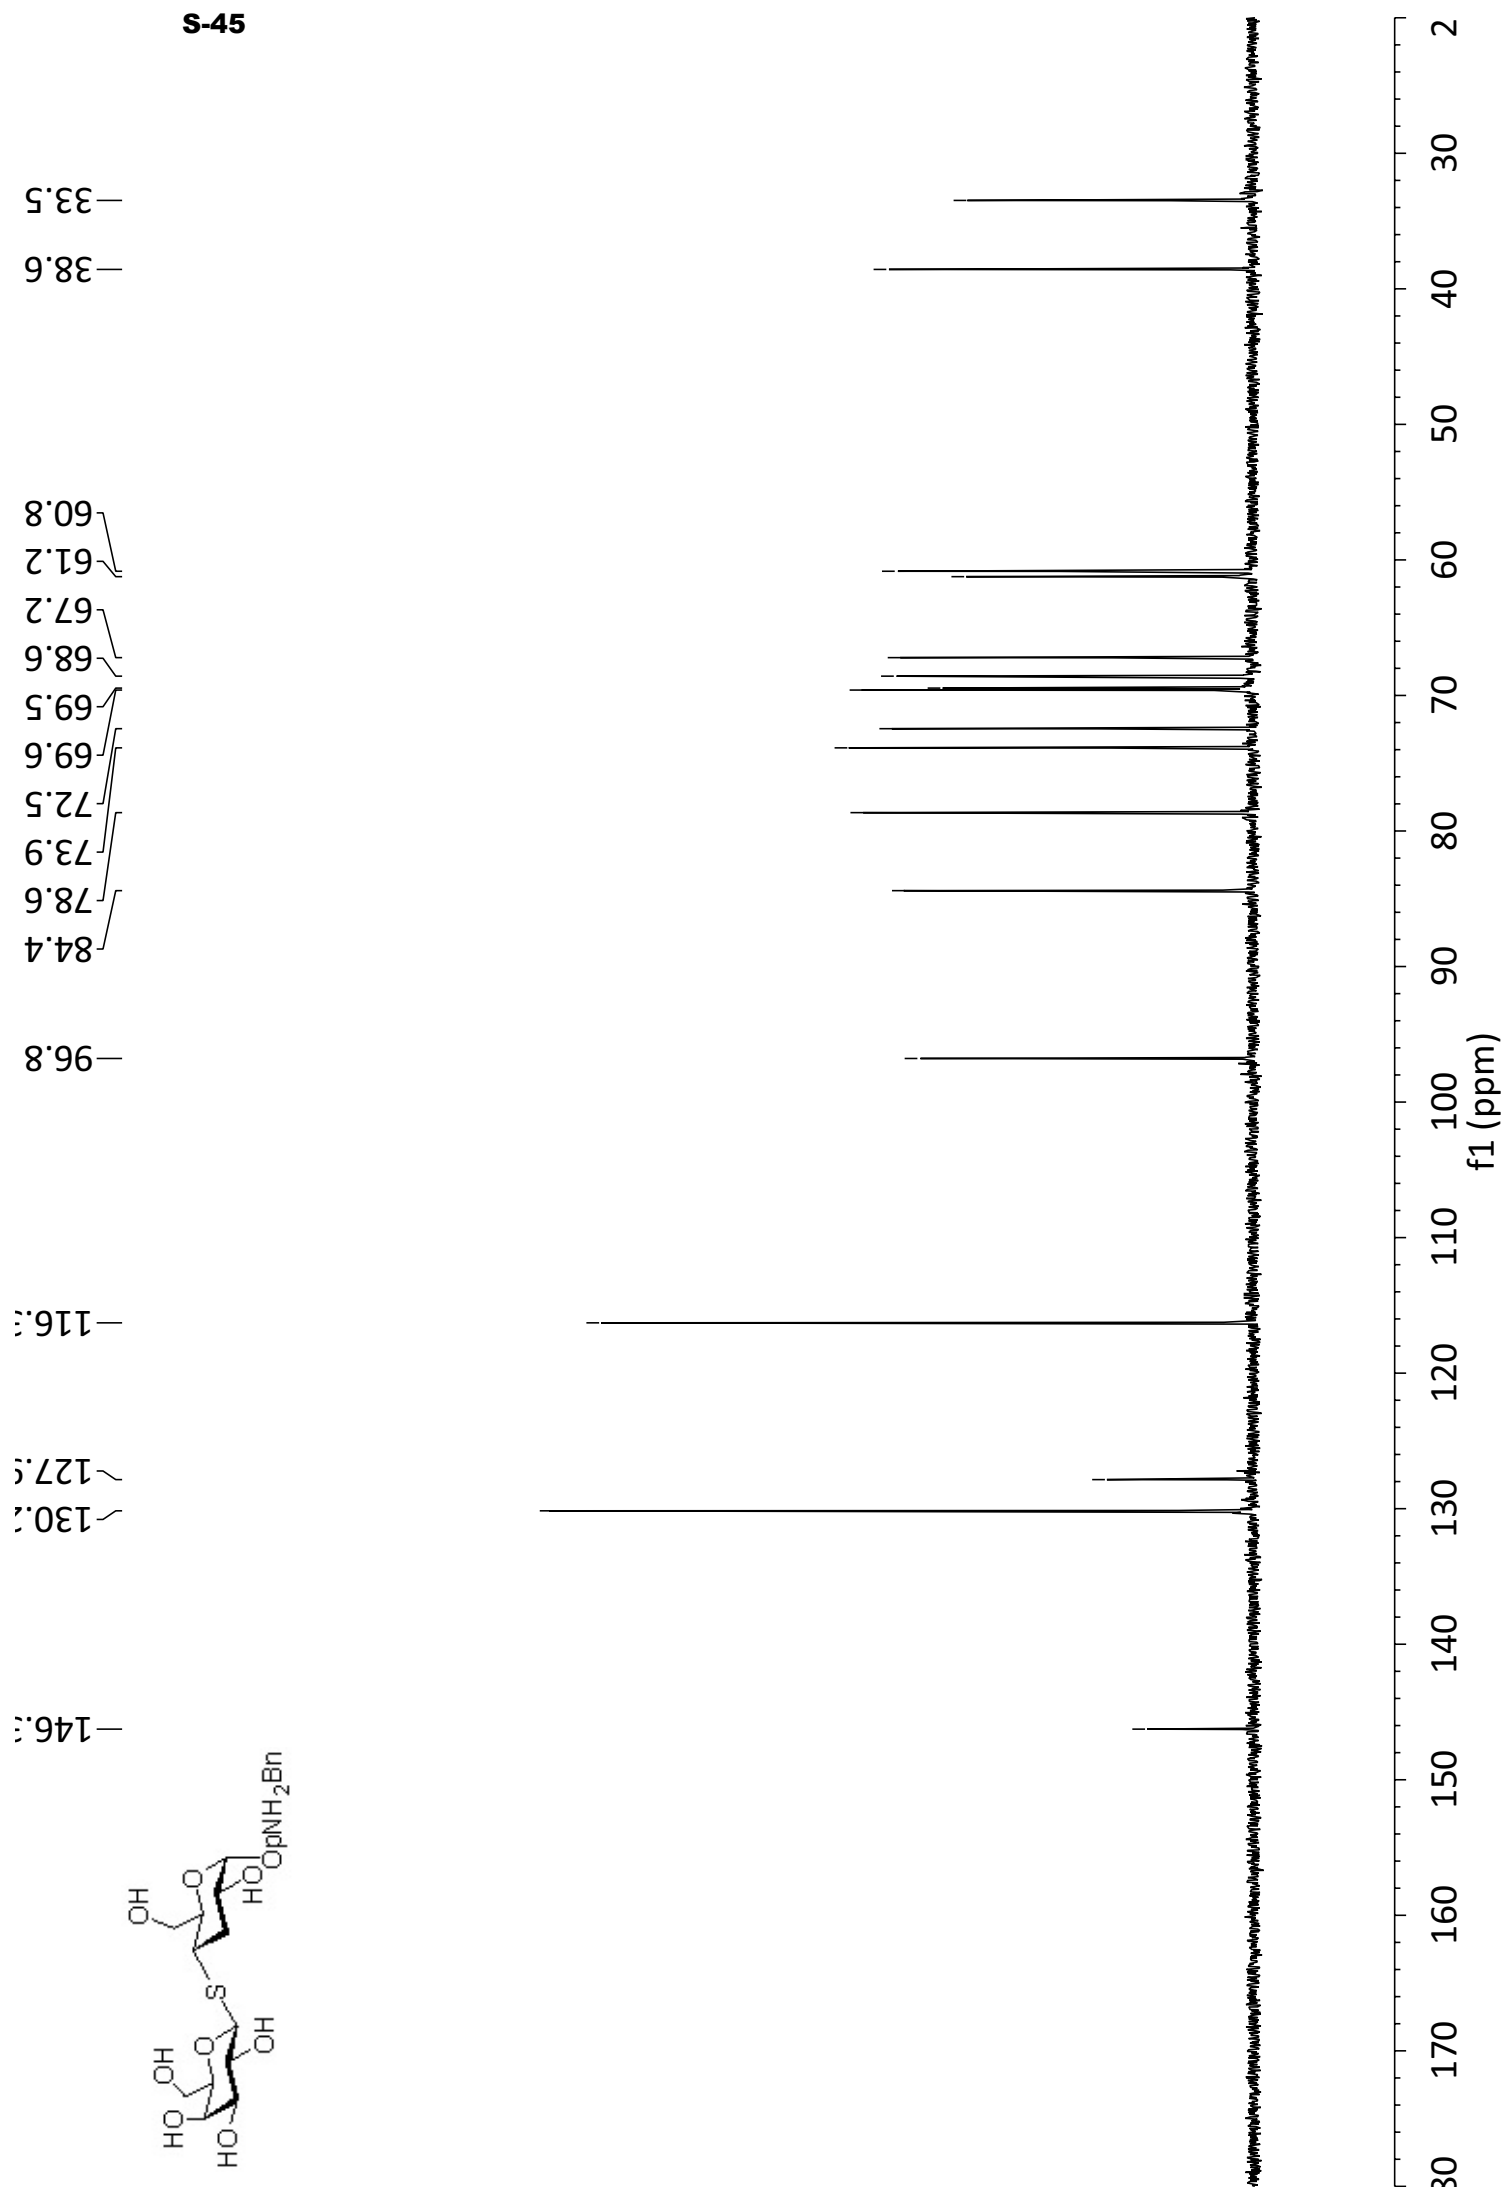

NOESY spectrum of **17**

□ anti  $\Phi$  /syn  $\Psi$     ○ syn  $\Phi$  /syn  $\Psi$     △ syn  $\Phi$  /anti  $\Psi$     □

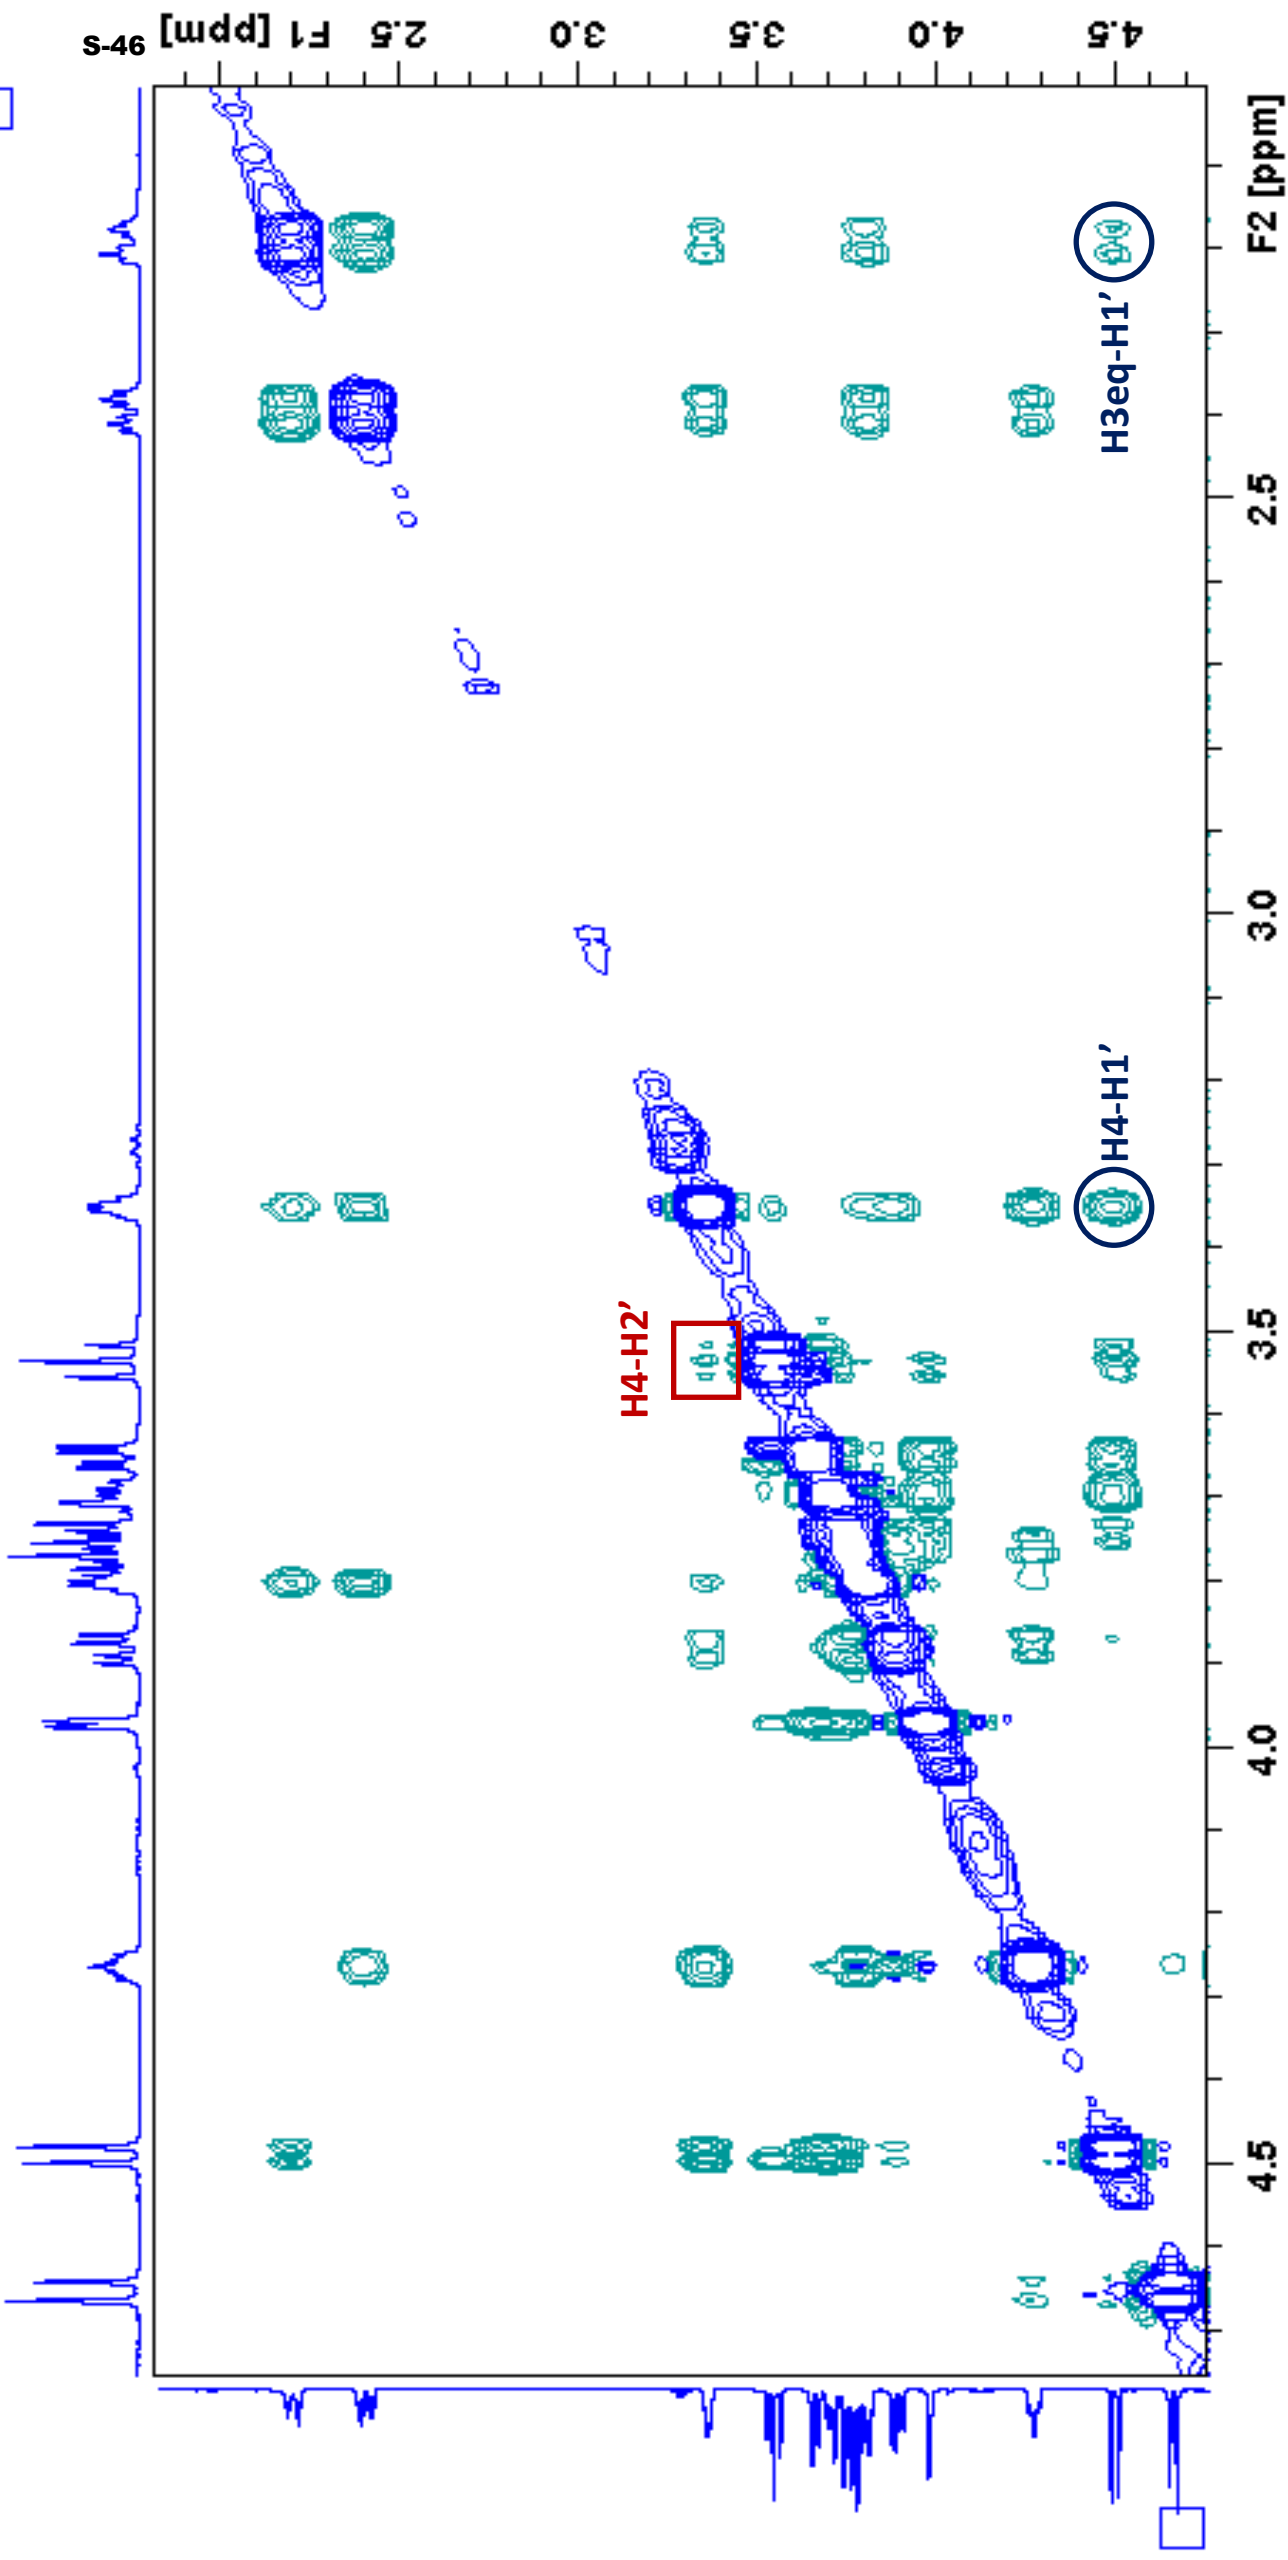

NOESY spectrum of **18**

□ anti  $\Phi$  /syn  $\Psi$     ○ syn  $\Phi$  /syn  $\Psi$     △ syn  $\Phi$  /anti  $\Psi$

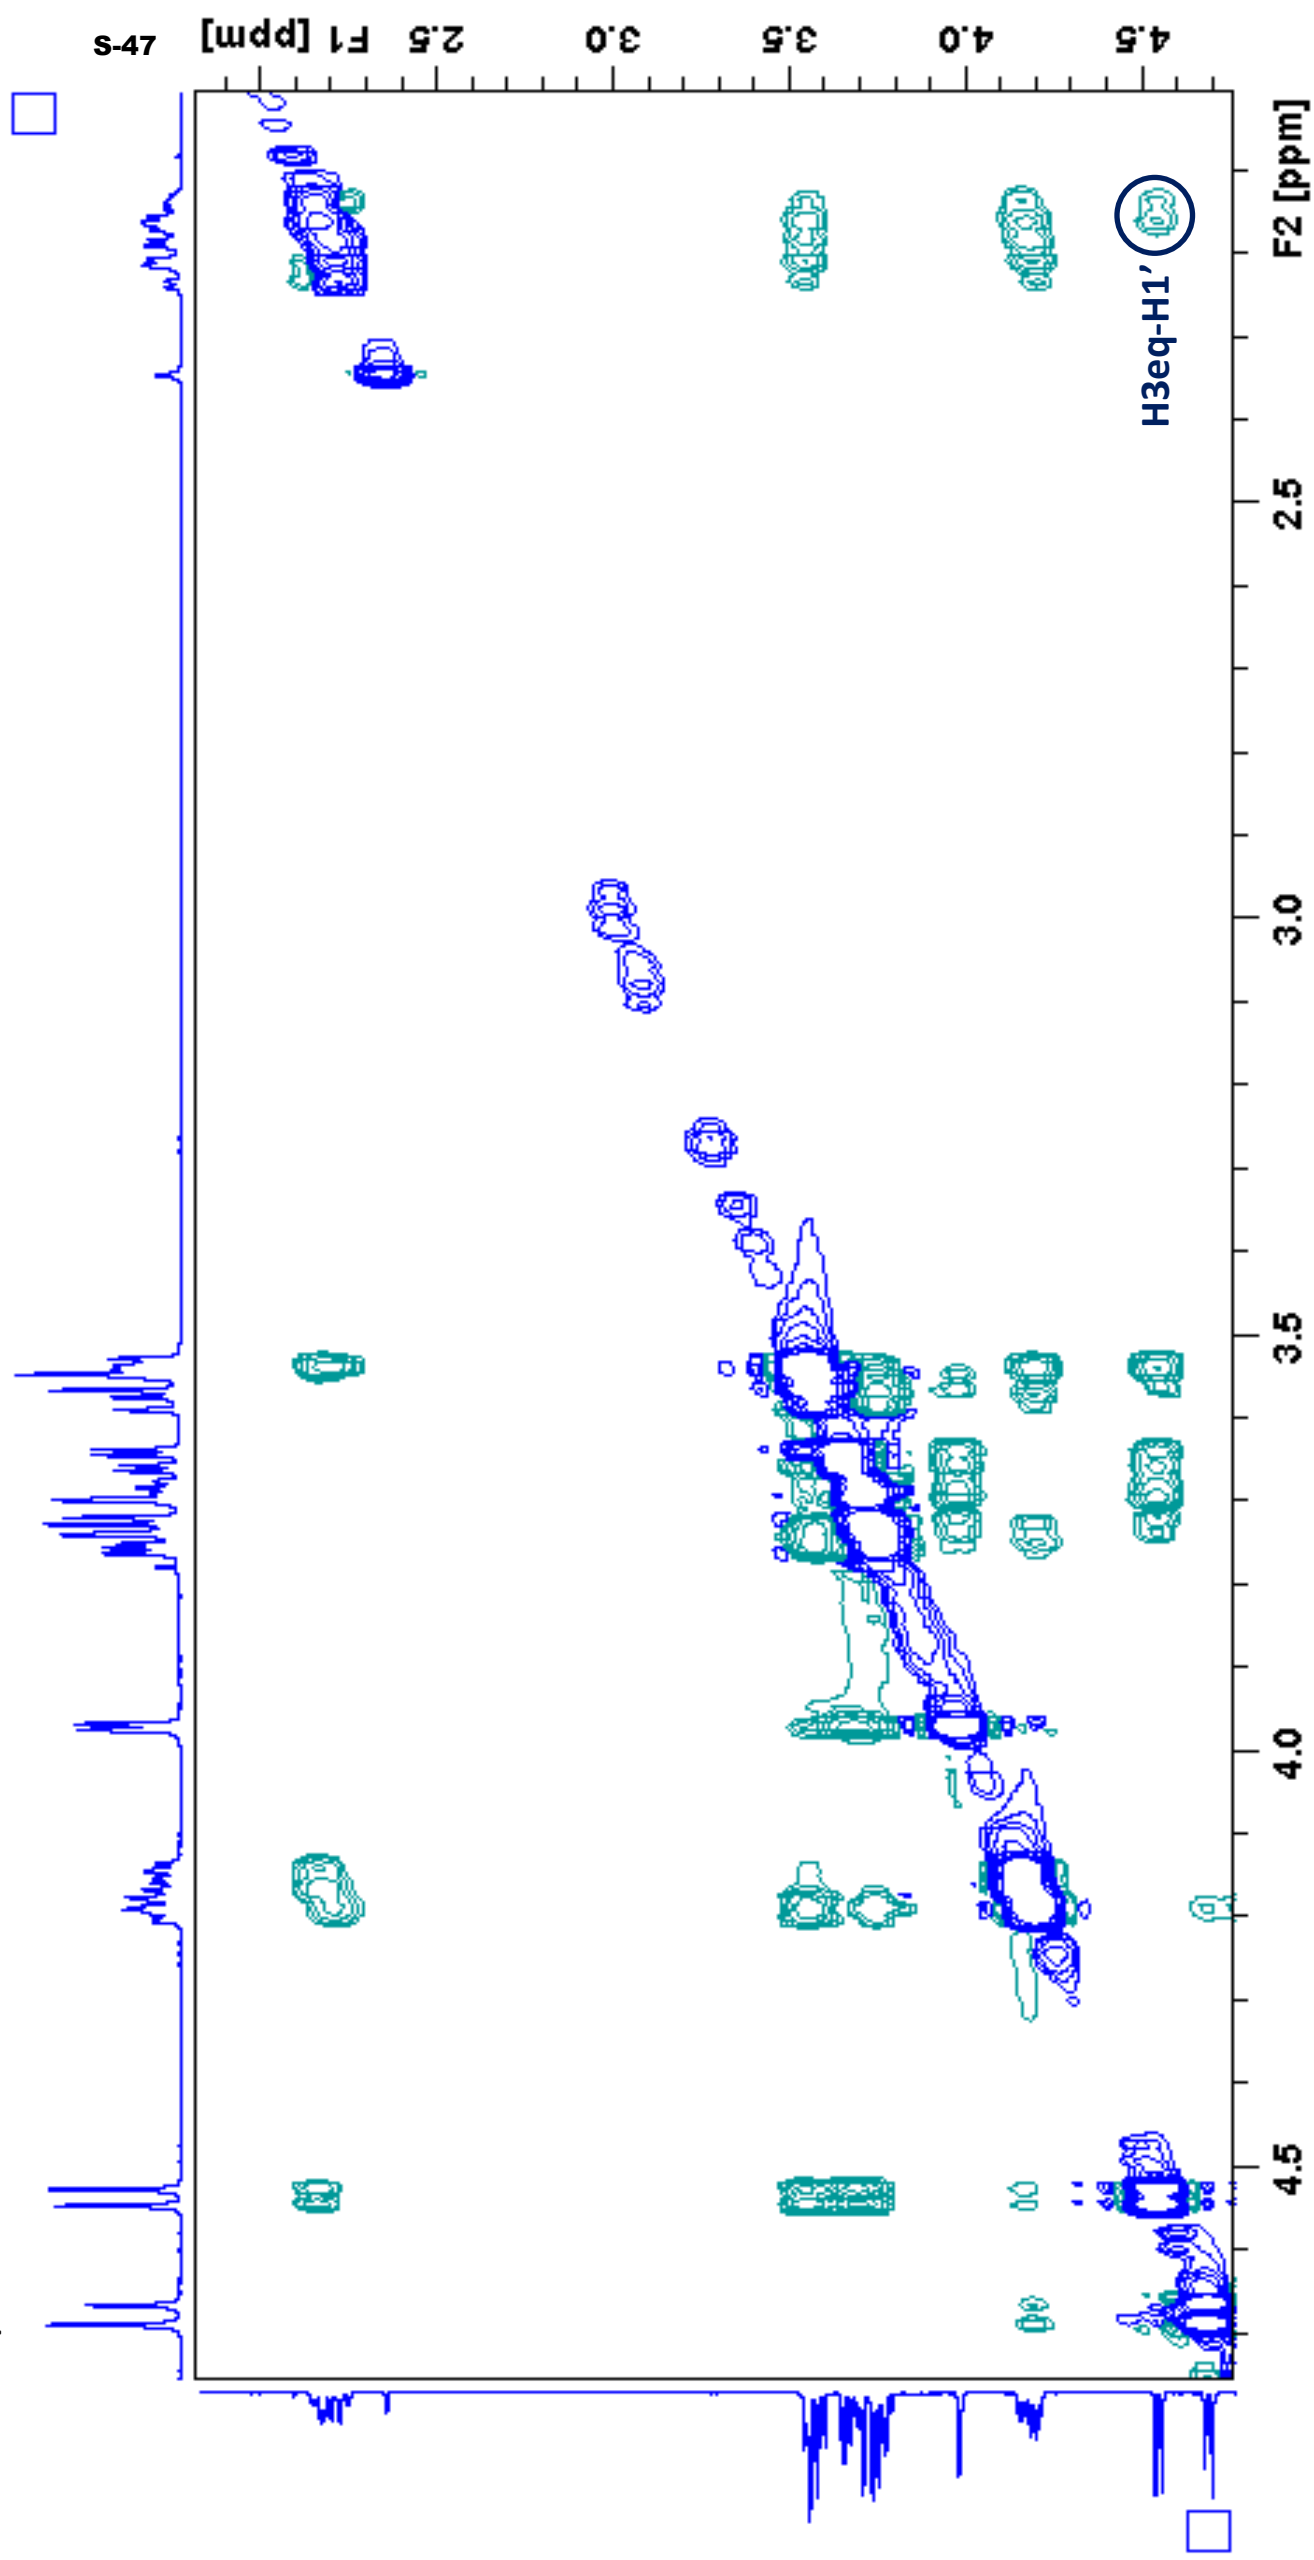

NOESY spectrum of **19**

□ anti  $\Phi$  /syn  $\Psi$    ○ syn  $\Phi$  /syn  $\Psi$    △ syn  $\Phi$  /anti  $\Psi$

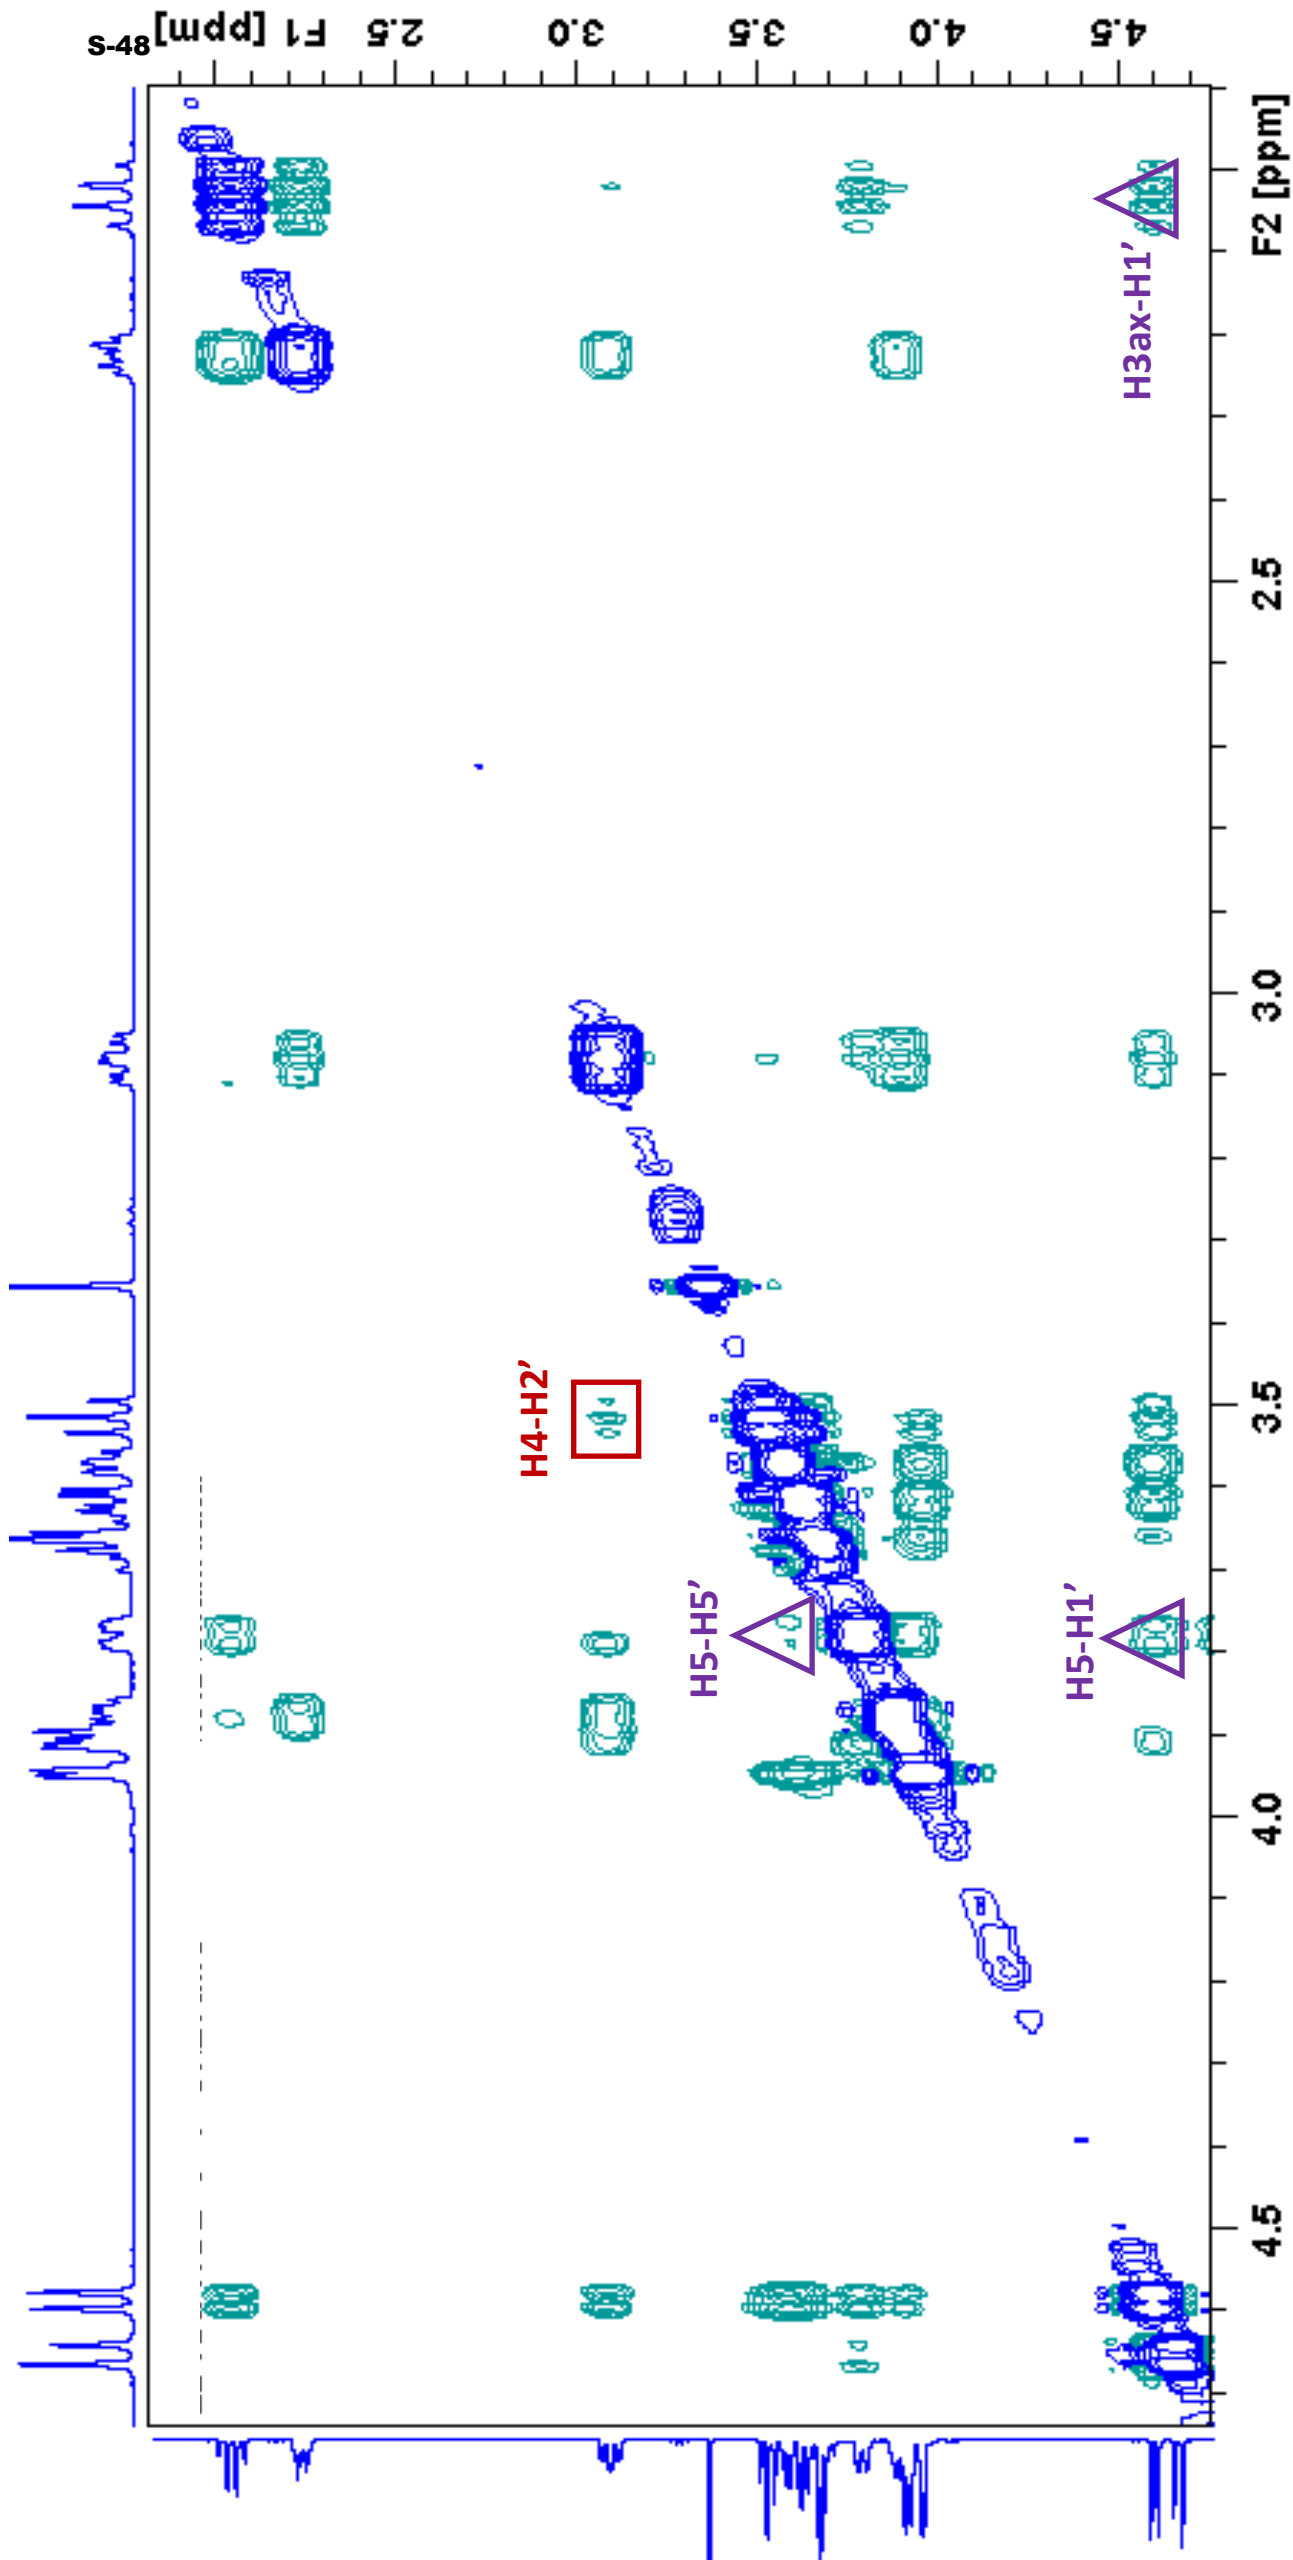



NOESY spectrum of **21**

□ anti  $\Phi$  /syn  $\Psi$    ○ syn  $\Phi$  /syn  $\Psi$    △ syn  $\Phi$  /anti  $\Psi$

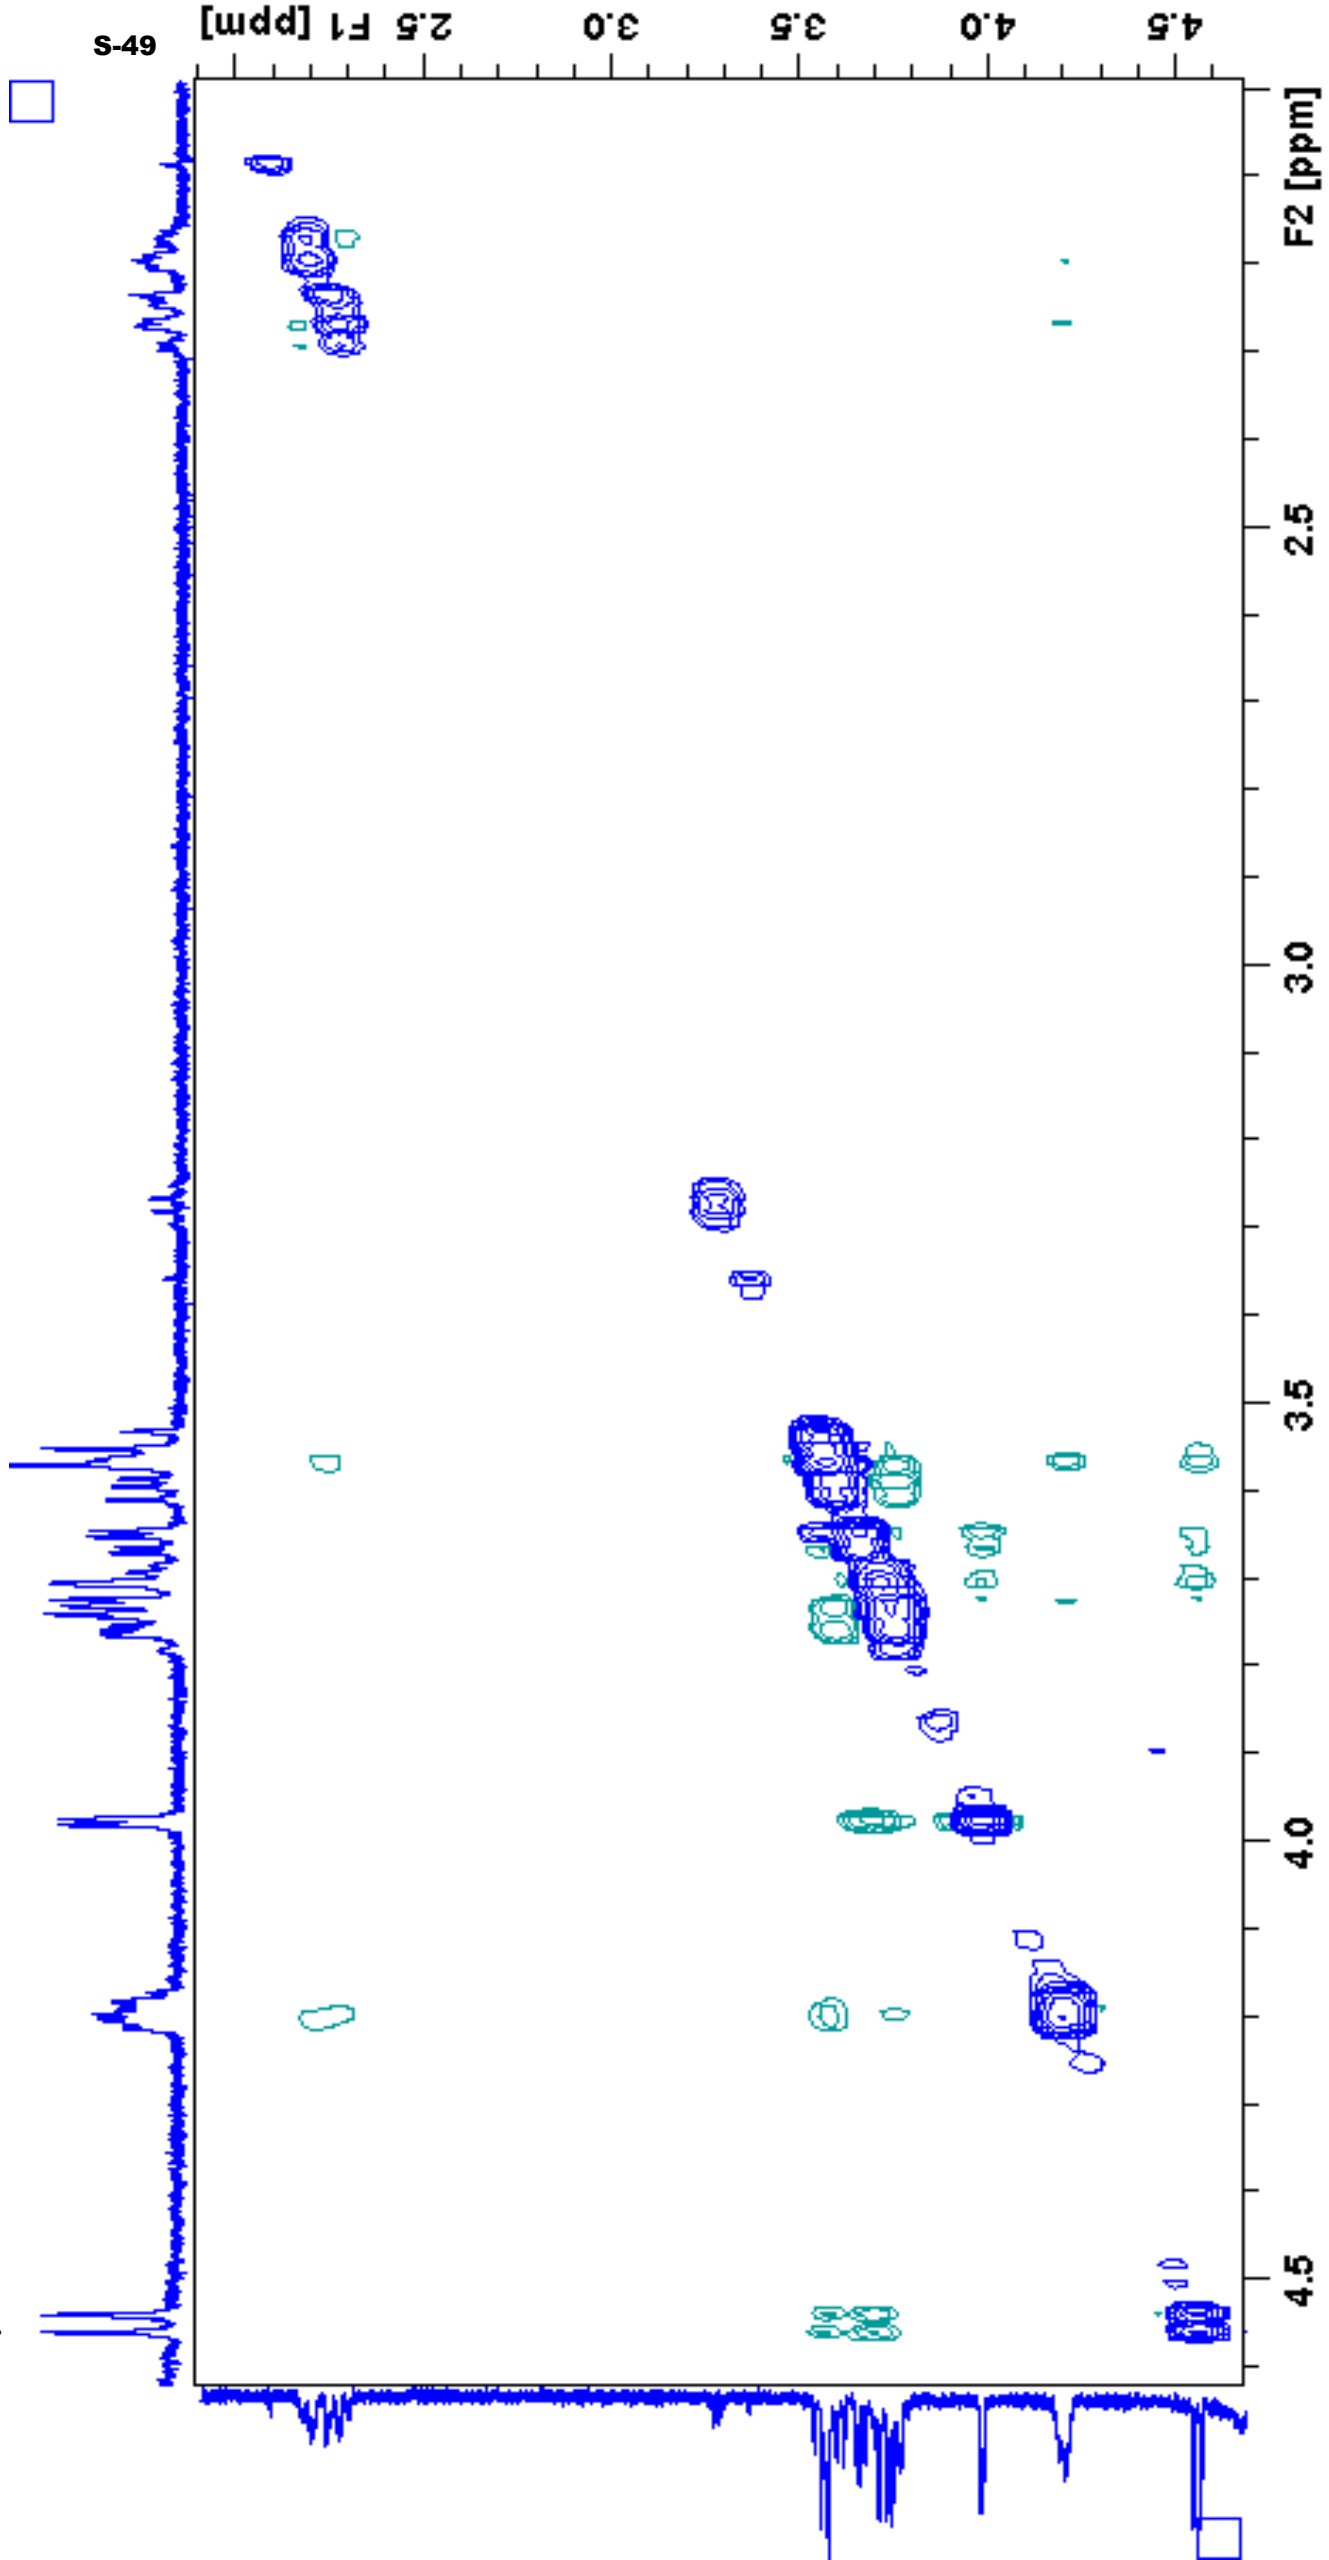

NOESY spectrum of **22**

□ anti  $\Phi$  /syn  $\Psi$     ○ syn  $\Phi$  /syn  $\Psi$     △ syn  $\Phi$  /anti  $\Psi$

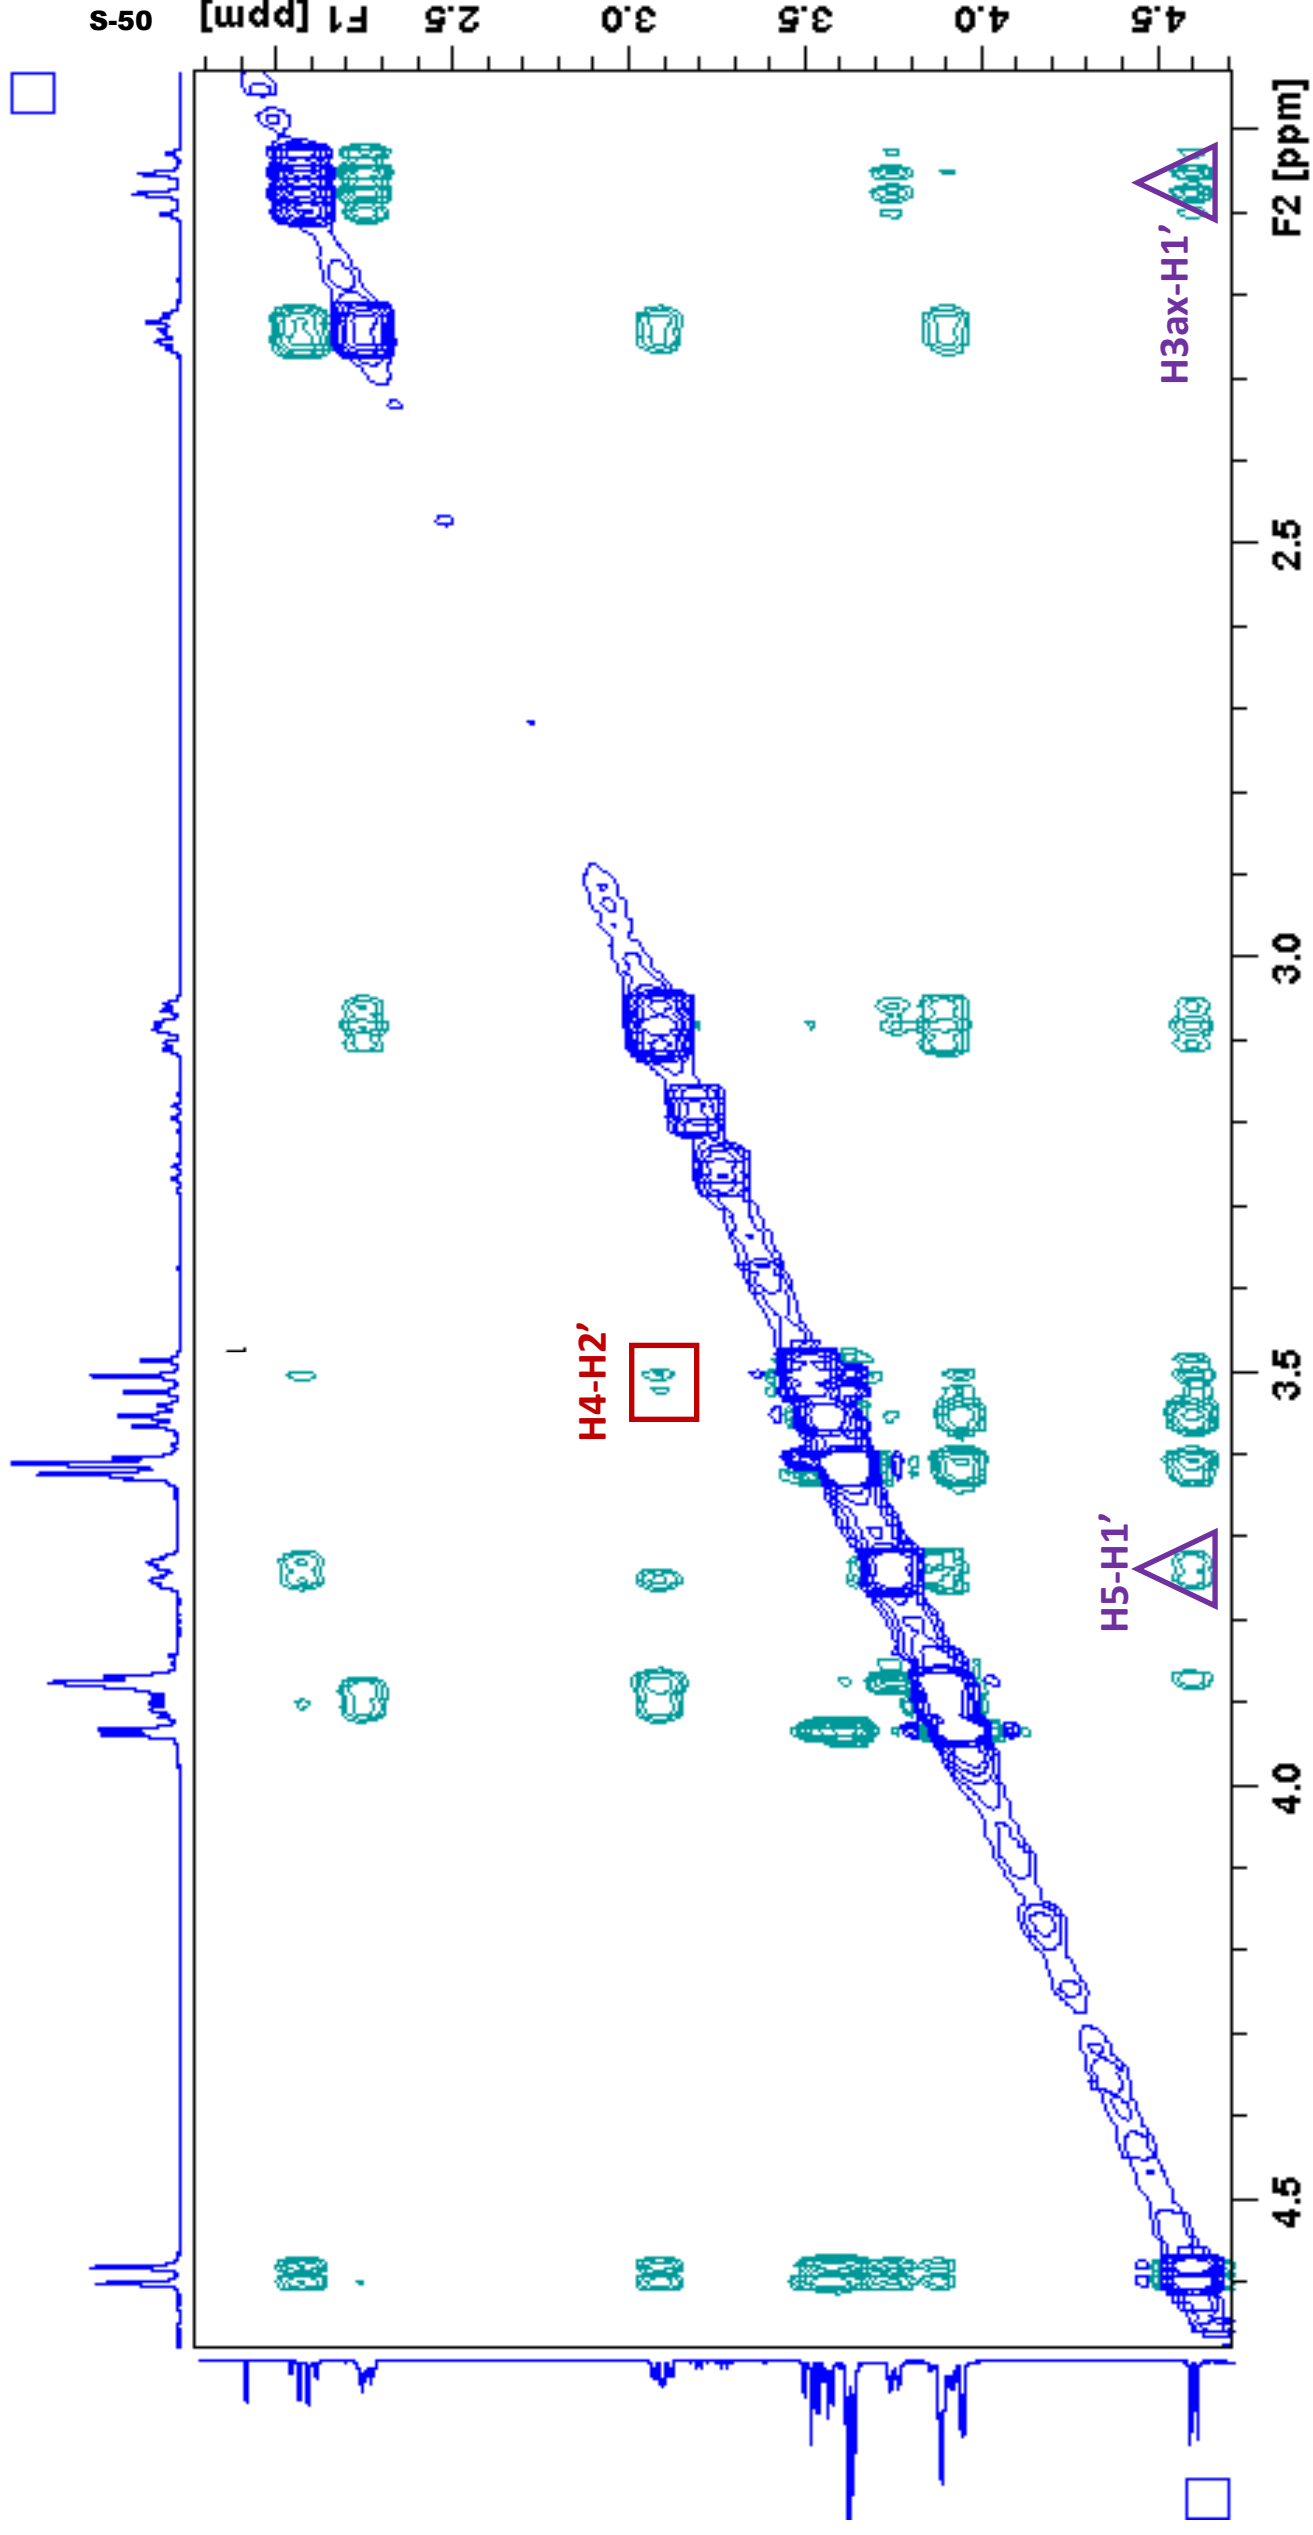

NOESY spectrum of **23**

□ anti  $\Phi$  /syn  $\Psi$     ○ syn  $\Phi$  /syn  $\Psi$     △ syn  $\Phi$  /anti  $\Psi$

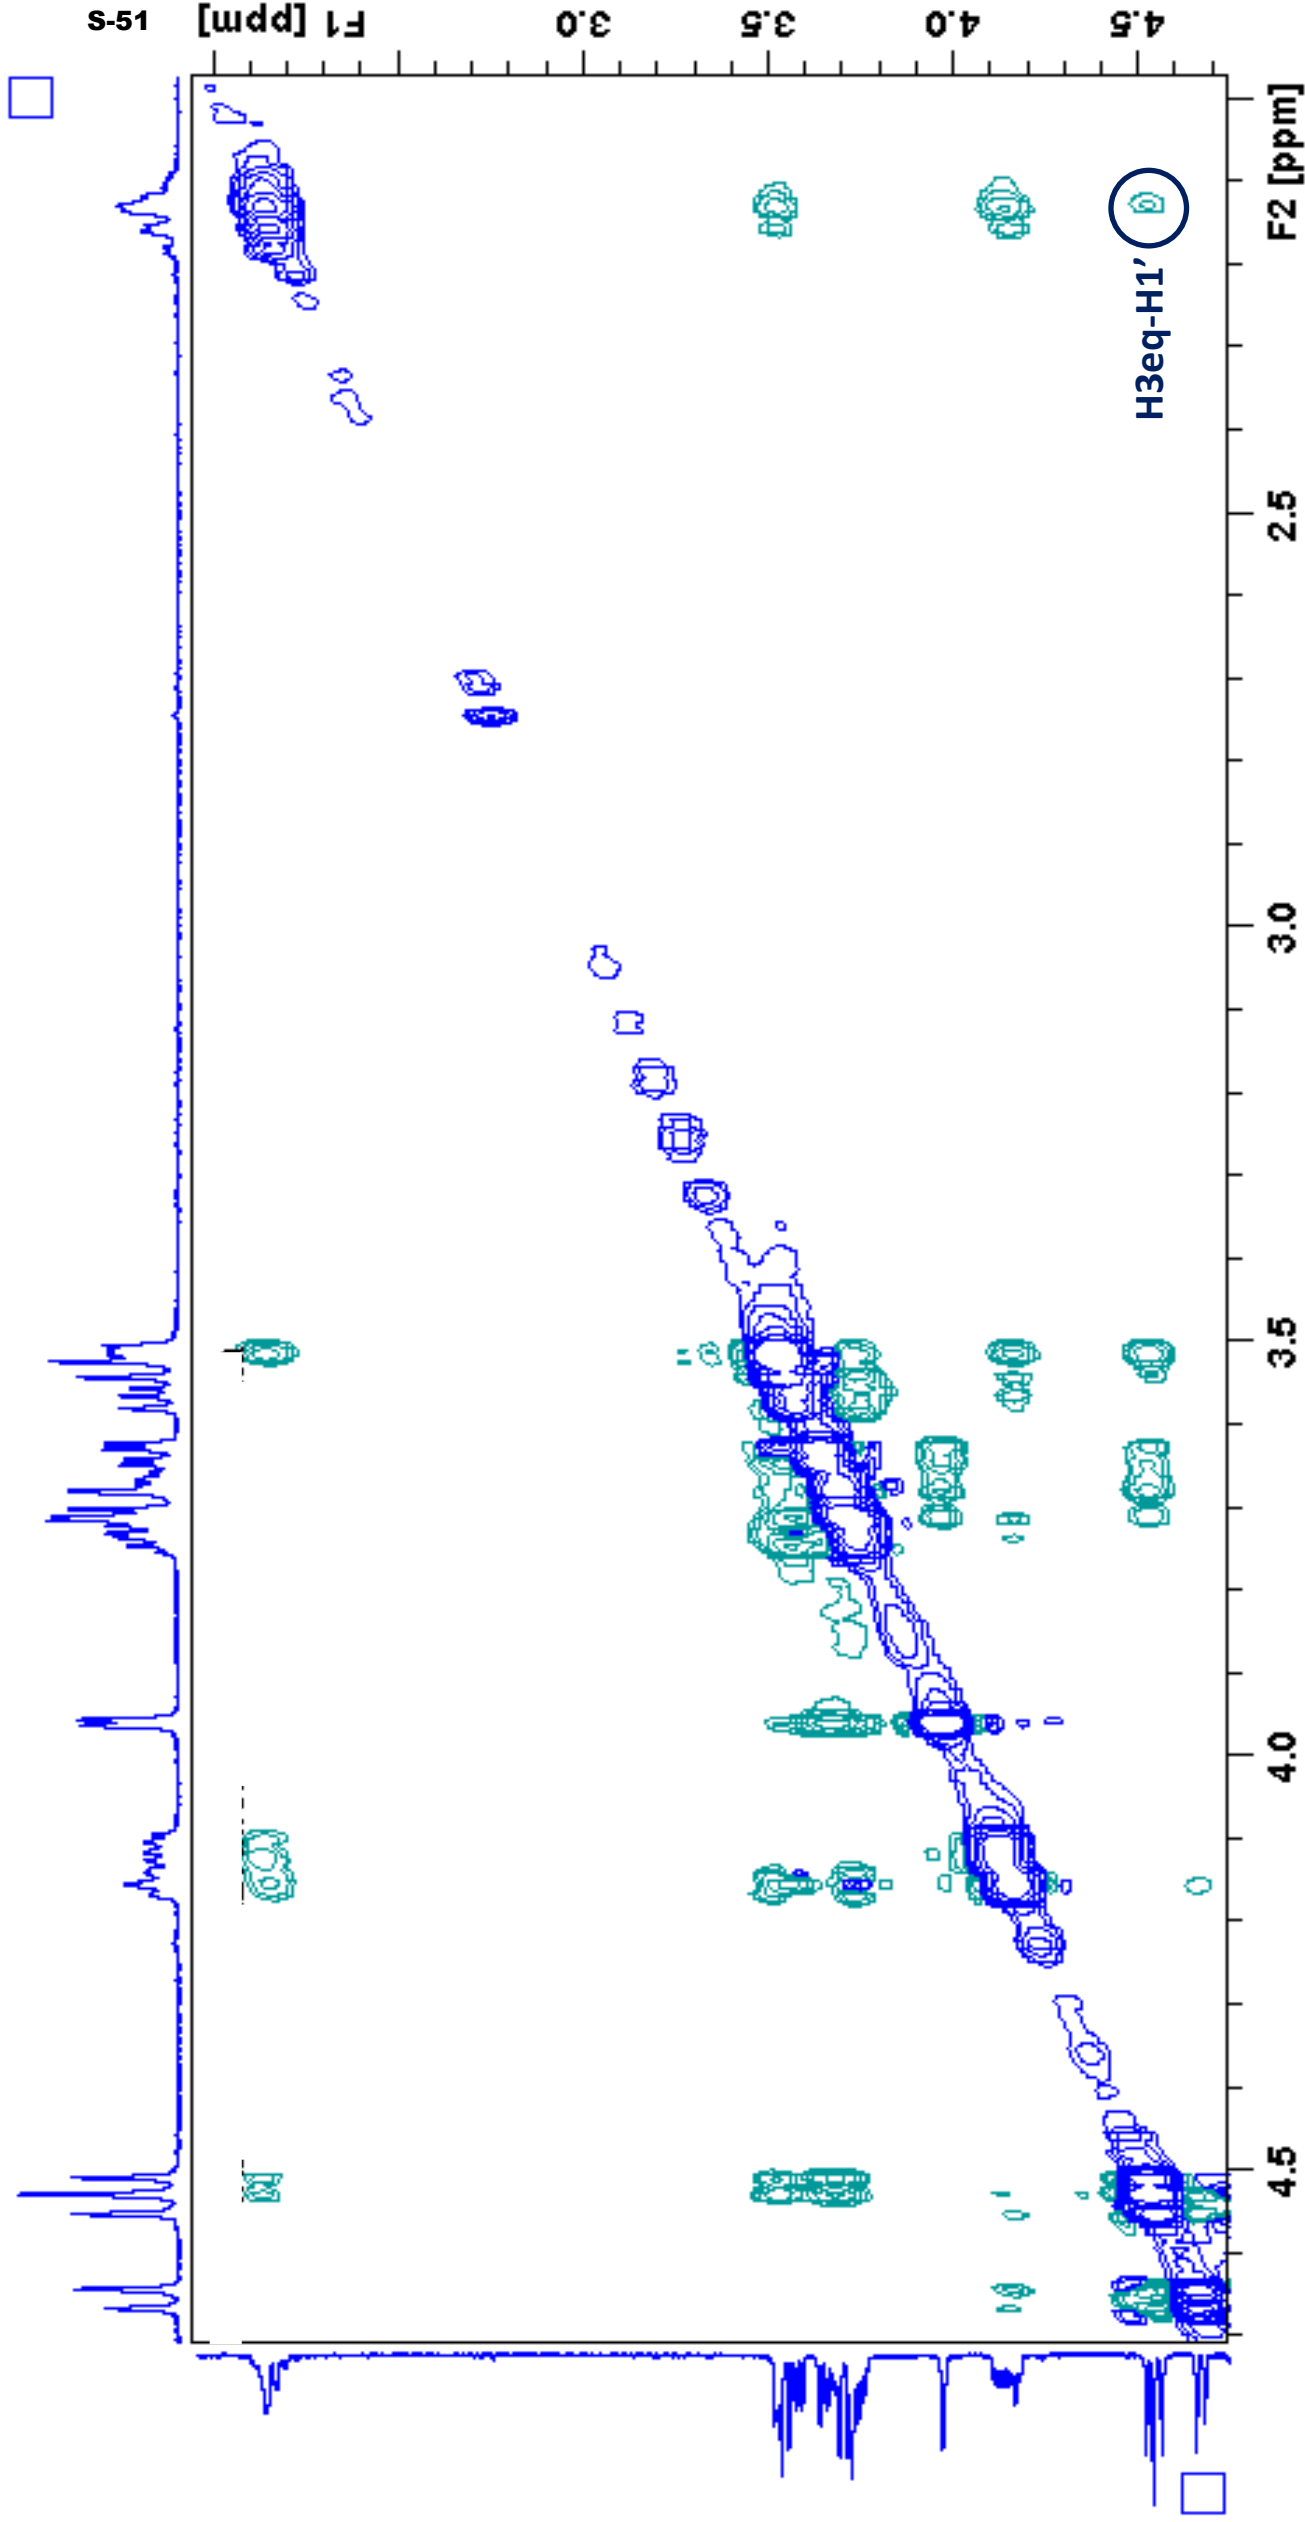

NOESY spectrum of 25

□ anti  $\Phi$  /syn  $\Psi$     ○ syn  $\Phi$  /syn  $\Psi$     △ syn  $\Phi$  /anti  $\Psi$

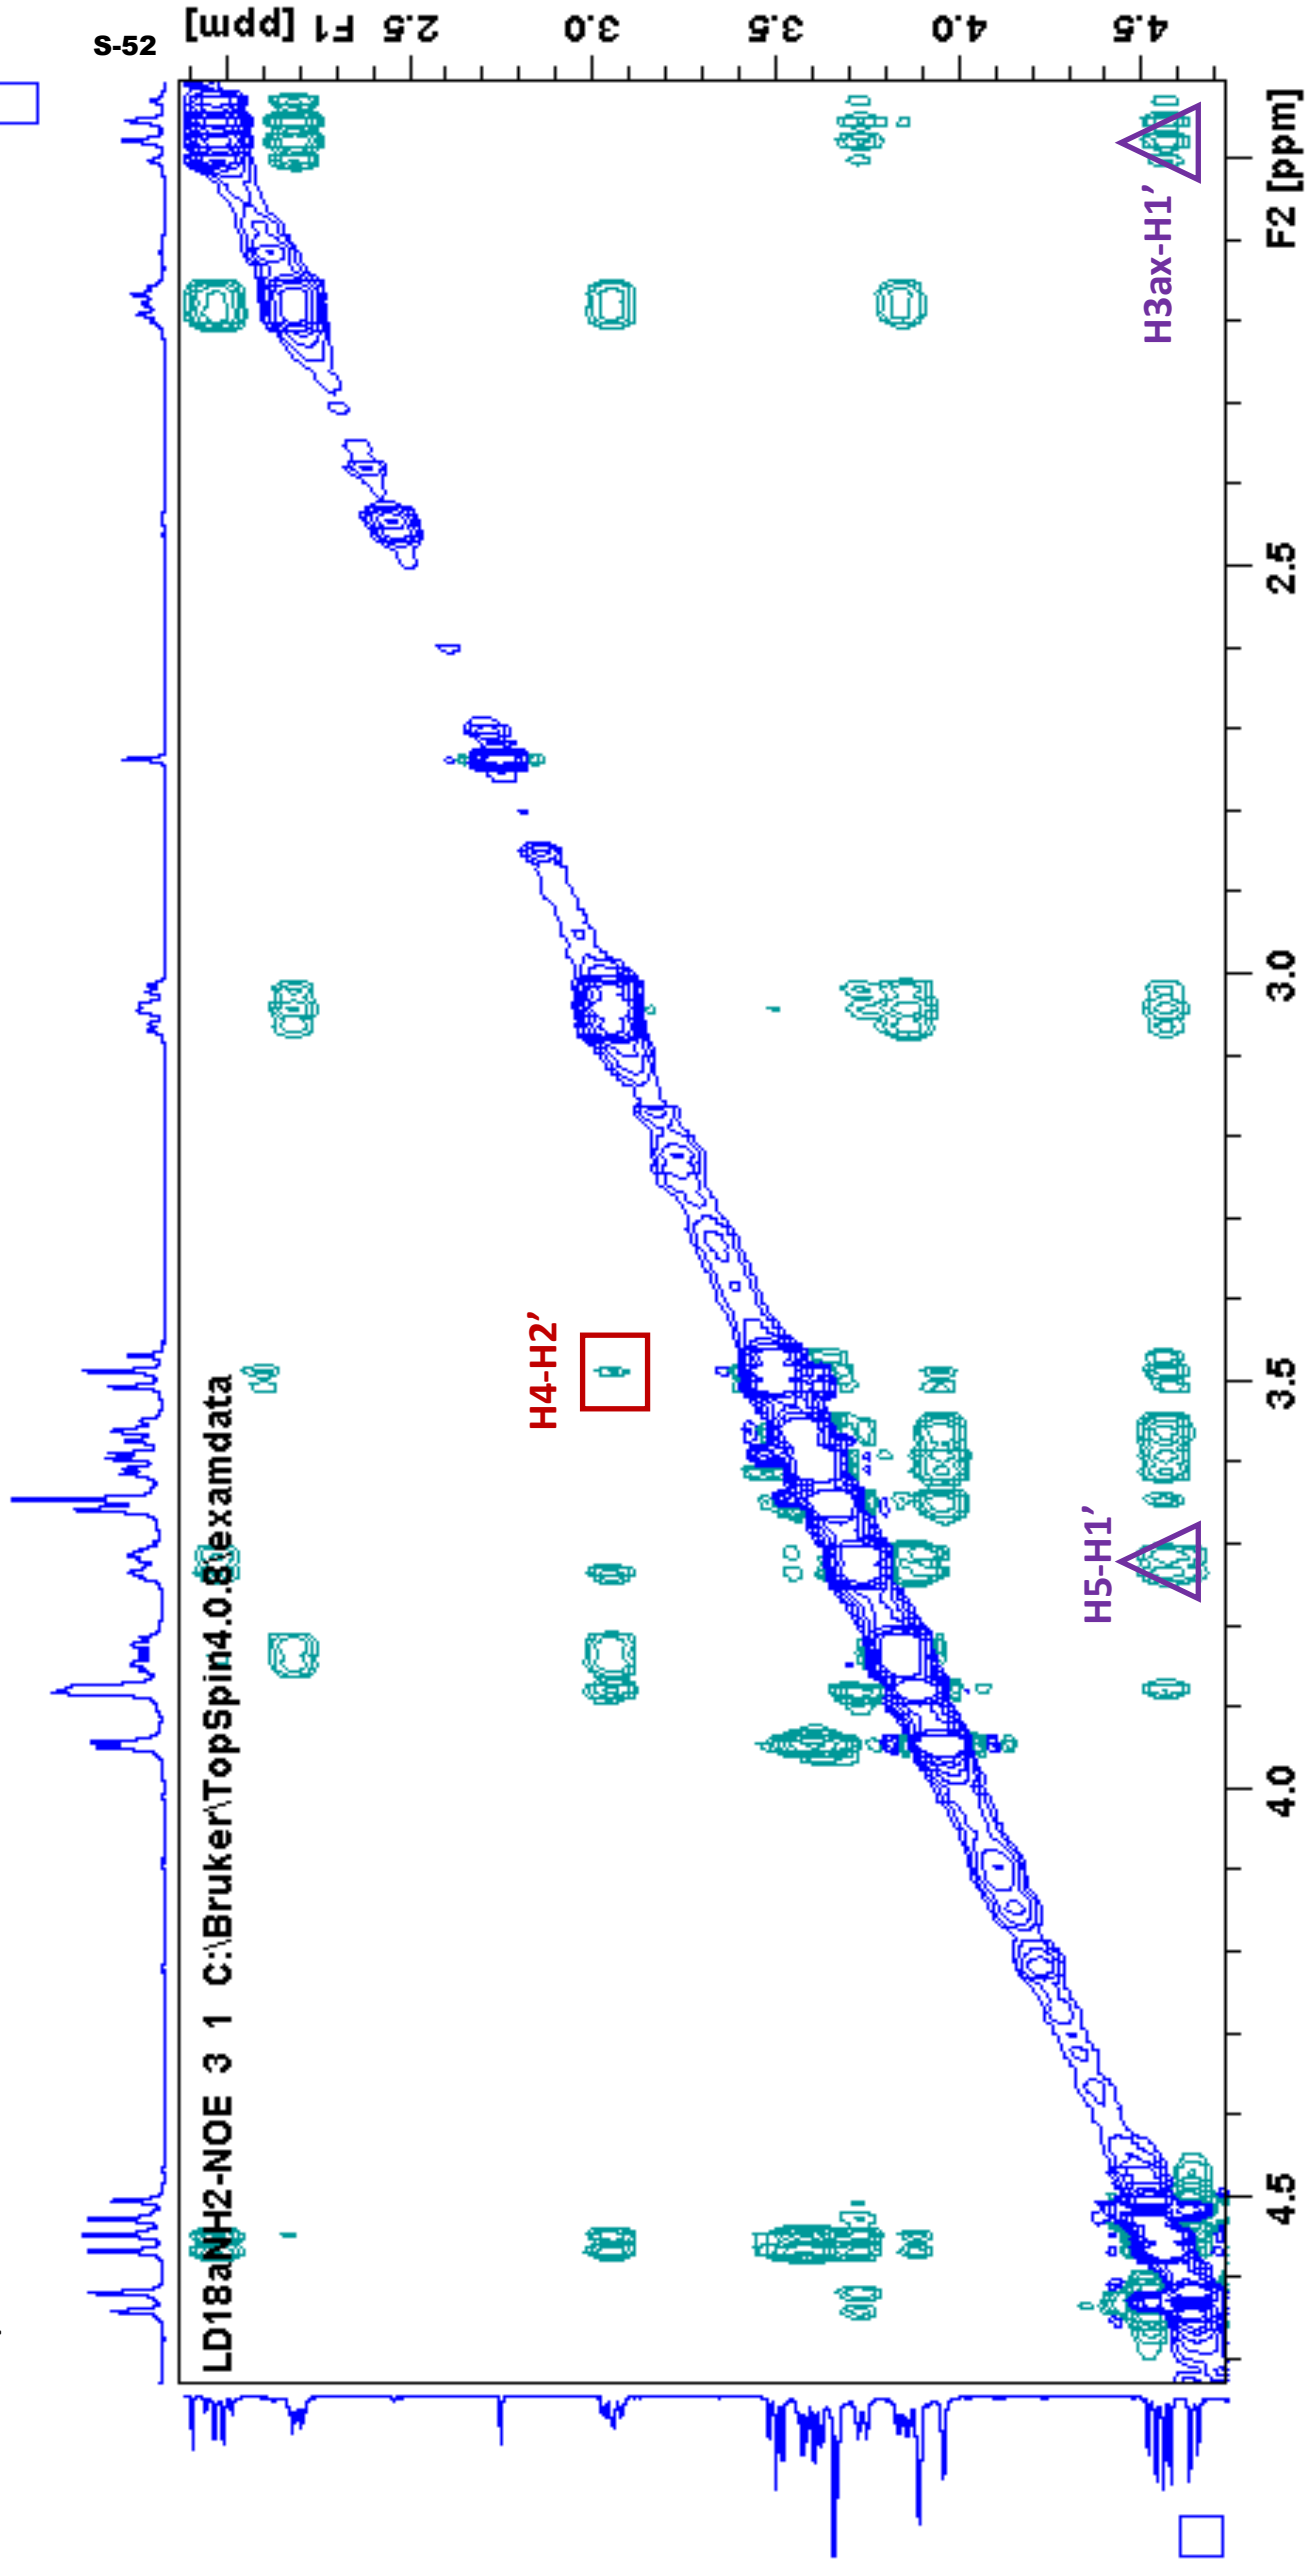

Supplement: d2ob02301f1.pdf [file d2ob02301f1.pdf]
